# Supplementary material for: Obesity in childhood, socioeconomic status, and completion of 12 or more school years: a prospective cohort study
Source: PubMed Central journal article supplement (PMC7957136; doi:10.1136/bmjopen-2020-040432), 2021-03-11
Supplement: bmjopen-2020-040432.draft_revisions.pdf [file bmjopen-2020-040432.draft_revisions.pdf]

# BMJ Open

BMJ Open is committed to open peer review. As part of this commitment we make the peer review history of every article we publish publicly available.

When an article is published we post the peer reviewers' comments and the authors' responses online. We also post the versions of the paper that were used during peer review. These are the versions that the peer review comments apply to.

The versions of the paper that follow are the versions that were submitted during the peer review process. They are not the versions of record or the final published versions. They should not be cited or distributed as the published version of this manuscript.

BMJ Open is an open access journal and the full, final, typeset and author-corrected version of record of the manuscript is available on our site with no access controls, subscription charges or pay-per-view fees (<http://bmjopen.bmj.com>).

If you have any questions on BMJ Open's open peer review process please email [info.bmjopen@bmj.com](mailto:info.bmjopen@bmj.com)

# BMJ Open

## Childhood obesity is negatively associated with completed educational level independent of socioeconomic status: a prospective cohort study

|                               |                                                                                                                                                                                                                                                                                                                                                                                                                                                                                                               |
|-------------------------------|---------------------------------------------------------------------------------------------------------------------------------------------------------------------------------------------------------------------------------------------------------------------------------------------------------------------------------------------------------------------------------------------------------------------------------------------------------------------------------------------------------------|
| Journal:                      | <i>BMJ Open</i>                                                                                                                                                                                                                                                                                                                                                                                                                                                                                               |
| Manuscript ID                 | bmjopen-2020-040432                                                                                                                                                                                                                                                                                                                                                                                                                                                                                           |
| Article Type:                 | Original research                                                                                                                                                                                                                                                                                                                                                                                                                                                                                             |
| Date Submitted by the Author: | 13-May-2020                                                                                                                                                                                                                                                                                                                                                                                                                                                                                                   |
| Complete List of Authors:     | Lindberg, Louise; Karolinska Institutet, Dept. Clinical Science, Intervention and Technology<br>Persson, Martina; Karolinska Institute, Department of Medicine, Clinical Epidemiology, Karolinska Institutet;<br>Liljeqvist, Pernilla; Karolinska Institutet, Dept. Clinical Science, Intervention and Technology<br>Hagman, Emilia; Karolinska Institutet, Dept. Clinical Science, Intervention and Technology<br>Marcus, Claude; Karolinska Institutet, Dept. Clinical Science, Intervention and Technology |
| Keywords:                     | Paediatric endocrinology < DIABETES & ENDOCRINOLOGY, EPIDEMIOLOGY, Paediatric endocrinology < PAEDIATRICS, PUBLIC HEALTH                                                                                                                                                                                                                                                                                                                                                                                      |
|                               |                                                                                                                                                                                                                                                                                                                                                                                                                                                                                                               |

SCHOLARONE™  
Manuscripts

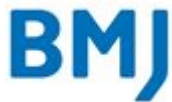

I, the Submitting Author has the right to grant and does grant on behalf of all authors of the Work (as defined in the below author licence), an exclusive licence and/or a non-exclusive licence for contributions from authors who are: i) UK Crown employees; ii) where BMJ has agreed a CC-BY licence shall apply, and/or iii) in accordance with the terms applicable for US Federal Government officers or employees acting as part of their official duties; on a worldwide, perpetual, irrevocable, royalty-free basis to BMJ Publishing Group Ltd ("BMJ") its licensees and where the relevant Journal is co-owned by BMJ to the co-owners of the Journal, to publish the Work in this journal and any other BMJ products and to exploit all rights, as set out in our [licence](#).

The Submitting Author accepts and understands that any supply made under these terms is made by BMJ to the Submitting Author unless you are acting as an employee on behalf of your employer or a postgraduate student of an affiliated institution which is paying any applicable article publishing charge ("APC") for Open Access articles. Where the Submitting Author wishes to make the Work available on an Open Access basis (and intends to pay the relevant APC), the terms of reuse of such Open Access shall be governed by a Creative Commons licence – details of these licences and which [Creative Commons](#) licence will apply to this Work are set out in our licence referred to above.

Other than as permitted in any relevant BMJ Author's Self Archiving Policies, I confirm this Work has not been accepted for publication elsewhere, is not being considered for publication elsewhere and does not duplicate material already published. I confirm all authors consent to publication of this Work and authorise the granting of this licence.

1  
2  
3  
4 1 Childhood obesity is negatively associated with completed  
5  
6 2 educational level independent of socioeconomic status: a  
7  
8  
9 3 prospective cohort study  
10  
11  
12 4  
13  
14

15 5 Louise Lindberg<sup>1</sup>, Martina Persson<sup>2,3,4</sup>, Pernilla Danielsson<sup>1</sup>, Emilia Hagman<sup>1\*</sup>, Claude  
16 6 Marcus<sup>1</sup>  
17  
18  
19  
20 7  
21  
22

23 8 <sup>1</sup>Department of Clinical Science, Intervention and Technology, Division of Pediatrics,  
24 9 Karolinska Institutet, Stockholm, Sweden  
25

26 10 <sup>2</sup>Department of Medicine Solna, Clinical Epidemiology Unit, Karolinska Institutet,  
27 11 Stockholm, Sweden  
28

29 12 <sup>3</sup>Department of Diabetes and Endocrinology, Sachska Children's Hospital Södersjukhuset,  
30 13 Stockholm, Sweden  
31  
32

33 14 <sup>4</sup>Department of Clinical Science and Education, Södersjukhuset, Karolinska Institutet,  
34 15 Stockholm, Sweden  
35

36 16 \*Corresponding author e-mail: [emilia.hagman@ki.se](mailto:emilia.hagman@ki.se) (EH)  
37

38 17 Other contributing authors e-mail: [louise.lindberg@ki.se](mailto:louise.lindberg@ki.se); [martina.persson@ki.se](mailto:martina.persson@ki.se);  
39 18 [pernilla.danielsson.liljeqvist@ki.se](mailto:pernilla.danielsson.liljeqvist@ki.se); [claudemarcus@ki.se](mailto:claudemarcus@ki.se)  
40

41 19 Keywords: Pediatric obesity, schools, epidemiology, social class, cohort study  
42

43 20 Word count: 3574  
44  
45  
46  
47  
48  
49  
50  
51  
52  
53  
54  
55  
56  
57  
58  
59  
60

## 21 **Abstract**

### 22 **Objectives**

23 Children with obesity achieve lower educational level compared with normal-weight peers.  
24 Parental socioeconomic status (SES) impacts both a child's academic achievement and risk  
25 of obesity. The degree to which the association between obesity and education depend on  
26 parental SES is unclear. Therefore, the primary aim is to investigate if individuals with  
27 obesity in childhood are less likely to complete  $\geq 12$  years of schooling, independently of  
28 parental SES. The secondary aim is to study how weight loss, level of education, and parental  
29 SES are associated.

### 31 **Methods**

32 In this nationwide prospective cohort study, children aged 10-17 years, recorded in the  
33 Swedish Childhood Obesity Treatment Register (BORIS), and aged 20 years or older at  
34 follow-up were included (n=3,942). A comparison group was matched by sex, year of birth,  
35 and living area (n=18,728). Parental SES was based on maternal and paternal level of  
36 education, income, and occupational status. The main outcome, completion of  $\geq 12$  years of  
37 schooling, was analysed with conditional logistic regression, and adjusted for group,  
38 migration background, ADHD/ADD, anxiety/depression, and parental SES.

### 40 **Results**

41 Among those with obesity in childhood, 56.7% completed  $\geq 12$  years in school compared  
42 with 74.4% in the comparison group (p<0.0001). High parental SES compared to low SES

1  
2  
3 43 was strongly associated with attained level of education in both children with and without  
4  
5 44 obesity, adjusted odds ratio (<sup>a</sup>OR) [99% confidence interval (CI)]=5.40 [4.45 to 6.55].  
6  
7  
8 45 However, obesity in childhood remains a strong risk factor of completing  $\geq 12$  school years,  
9  
10 46 independently of parental SES, <sup>a</sup>OR=0.57 [0.51 to 0.63]. Successful obesity treatment  
11  
12 47 increased the odds of completing  $\geq 12$  years in school even when taking parental SES into  
13  
14 48 account, <sup>a</sup>OR=1.34 [1.04 to 1.72].  
15  
16  
17  
18  
19

## 20 **Conclusions**

21  
22 51 Individuals with obesity in childhood have lower odds of completing  $\geq 12$  years of schooling,  
23  
24 52 independently of parental SES. Optimized obesity treatment may improve school results in  
25  
26  
27 53 this group.  
28  
29  
30  
31

## 32 **Article summary / Strengths and limitation of this study**

- 33  
34  
35 56 • In this prospective cohort study, we have been able to investigate the level of  
36  
37 57 education among a large number of individuals who have obesity in childhood (n=  
38  
39 58 3,942) in comparison with a matched group (n=18,728).  
40  
41  
42 59 • The study design of using longitudinal data from several national registers provided  
43  
44 60 the opportunity to control for important confounding factors, such as neuropsychiatric  
45  
46 61 disorders, anxiety, depression and family socioeconomic status.  
47  
48  
49 62 • Factors such as free education, school lunches, and students' health care may have an  
50  
51 63 impact on the generalizability of our data to other populations.  
52  
53  
54  
55  
56  
57  
58  
59  
60

## 65 Introduction

66 During the last 40 years, the prevalence of childhood obesity has increased exponentially in  
67 many parts of the world.<sup>1</sup> Childhood obesity is associated with increased risks of somatic  
68 morbidity and risk of premature death in adulthood.<sup>2-5</sup> Psychosocial maladjustment, anxiety  
69 and depression are also prevalent<sup>6 7</sup> and may contribute to the obesity-related long-term  
70 morbidity and mortality.<sup>5</sup> Most studies report that children with obesity more often have  
71 lower school grades and reach a lower level of education compared with normal-weight  
72 peers,<sup>8-10</sup> but in a recent study, only girls with obesity were affected.<sup>11</sup> We have previously  
73 confirmed the association between obesity and lower attained level of education among both  
74 girls and boys.<sup>9</sup> We also found that successful obesity treatment was positively correlated  
75 with completing  $\geq 12$  school years, although without taking socioeconomic status (SES) into  
76 account.<sup>9</sup>

77 Low parental SES is a well-established risk factor for both childhood obesity and poorer  
78 academic achievement.<sup>12</sup> In particular, parental education has been demonstrated to influence  
79 the child's performance at school.<sup>13-15</sup> In addition, depression<sup>16</sup> and neuropsychiatric  
80 disorders, including Attention Deficit Disorder with or without Hyperactivity  
81 (ADHD/ADD),<sup>17</sup> may adversely affect school results. Depression and neuropsychiatric  
82 disorders are more common in children with obesity compared to the general population.<sup>9 18</sup>  
83 Investigating the impact of obesity alone on attained level of education requires that these  
84 and other confounders are considered. The primary aim of this study was to disentangle the  
85 association of childhood obesity and parental SES on completed level of education. The

1  
2  
3 86 secondary aim was to study if positive effects of weight loss on attained level of education is  
4  
5 87 affected by parental SES.  
6  
7

## 8 88 **Methods**

### 9 89 **Study population**

10  
11  
12  
13  
14  
15  
16 90 This prospective cohort study included children with obesity,<sup>19</sup> aged 10-17 years at the start  
17  
18 91 of obesity treatment (December 1994 to December 2015), and aged 20 years or older and  
19  
20  
21 92 living in Sweden at follow-up (December 31<sup>st</sup> 2017; n=3,942). Data on subjects receiving  
22  
23 93 treatment for childhood obesity was collected from the Swedish Childhood Obesity  
24  
25 94 Treatment Register (BORIS). BORIS has been thoroughly described elsewhere,<sup>20</sup> but in  
26  
27  
28 95 short: The main purpose of the register is quality assessment and long-term evaluation of  
29  
30 96 childhood obesity treatment. Treatment is individualized and consists primarily of lifestyle  
31  
32 97 modification (i.e. diet and physical activity).  
33  
34

35 98 A comparison group from the general population was randomly identified using the Swedish  
36  
37 99 Total Population Register and matched by sex, year of birth, and living area at the year  
38  
39  
40 100 obesity treatment was initiated (n=18,728). Using density matching without replacement,  
41  
42 101 five individuals were matched to each individual from the childhood obesity cohort. Siblings  
43  
44 102 of children registered in the childhood obesity cohort were excluded from the comparison  
45  
46 103 group. Children with a diagnosis of mental retardation or genetic syndromes were excluded  
47  
48 104 from both the childhood obesity cohort and the comparison group (Fig 1 and S1 Table).  
49  
50

51  
52 105

53  
54  
55 106 **Fig 1. Participant flowchart.**  
56



1  
2  
3 107 Families were informed in written or verbal about data collection in the Swedish Childhood  
4  
5 108 Obesity Treatment Register. Post an opt-out approval by parents/guardians, data of the  
6  
7 109 children's weight and height were recorded by the local health care provider during treatment  
8  
9 110 visits. There was no data of weight and height of individuals in the comparison group.  
11  
12 111 However, less than 1% of the individuals in the comparison group were found in the National  
13  
14 112 Patient Register with a diagnosis of obesity in childhood. In Sweden, health care is free of  
15  
16 113 charge for children and adolescents until 18 years of age. The study was approved by the  
17  
18 114 regional Ethics Committee in Stockholm, Sweden (No. 2016/922-31/1).

## 115 **Data sources**

116 Using the Swedish identity number, which is unique to each resident in Sweden, data from  
117 several national registers were linked <sup>21</sup>. Data on education, income, and occupational status  
118 were obtained from the Longitudinal Integration Database for Health Insurance and Labour  
119 Market Studies. Information on migration background for children and their parents was  
120 obtained from the Swedish Total Population Register <sup>22</sup>. Both these registers are held by  
121 Statistics Sweden, a governmental agency that collects and provide official statistics  
122 ([www.scb.se/en](http://www.scb.se/en)).

123 Data on diagnoses of mental retardation, genetic syndromes, ADHD/ADD, anxiety, and  
124 depression were identified based on codes according the International Classification of  
125 Diseases (10<sup>th</sup> revision; S1 Table) and retrieved from the National Patient Register <sup>23</sup>.  
126 Information on prescriptions of psychostimulant drugs for ADHD/ADD as well as  
127 antidepressants and tranquilizers for anxiety and depression were identified using the  
128 Anatomical Therapeutic Chemical classification system (S1 Table) retrieved from the

1  
2  
3 129 Swedish Prescribed Drug Register<sup>24</sup>. Data on deaths were retrieved from the Cause of Death  
4  
5 130 Register<sup>25</sup>. These registers are held and were linked by the governmental agency the National  
6  
7 131 Board of Health and Welfare ([www.socialstyrelsen.se/english](http://www.socialstyrelsen.se/english)).

## 11 132 **Definition of outcome**

13 133 The main outcome was defined as completion of  $\geq 12$  years of schooling, and based on the  
14  
15 134 International Standard Classification of Education<sup>26</sup>. In Sweden, children start school at the  
16  
17 135 age of 6 or 7 years and attend compulsory school for 9 years. Upper secondary school  
18  
19 136 includes three additional years of schooling and provides the requirements to attend higher  
20  
21 137 education. Usually students graduate from secondary school at 18 or 19 years of age. All  
22  
23 138 education in Sweden is free of charge. Students in compulsory and upper secondary school  
24  
25 139 are provided school lunches and health care at schools, also free of charge.

## 31 140 **Definition of main exposures**

32  
33  
34 141 Body Mass Index Standard Deviation Score (BMI SDS) is standardized by sex and age and  
35  
36 142 used to measure degree of obesity in growing children<sup>19</sup>. Baseline measures (continuous)  
37  
38 143 were used for the variable BMI SDS at start of treatment. Response to obesity treatment was  
39  
40 144 based on the change of BMI SDS from the first to the last clinical visit and categorized into  
41  
42 145 four groups<sup>27 28</sup>: good response, a reduction of BMI SDS by 0.25 units or more; no response,  
43  
44 146 a change of BMI SDS by +/- 0.25 units; poor response, an increase of BMI SDS by 0.25 units  
45  
46 147 or more; and dropouts, children with less than one year between their first and last measure  
47  
48  
49  
50 148 or without clinical follow-up after their first registered visit.

1  
2  
3 149 Parental SES was based on maternal and paternal level of education, income, and  
4  
5 150 occupational status at the year the child turned 15 years, which is about the same time as the  
6  
7  
8 151 child starts upper secondary school. In case of the child was adopted, the SES of adoptive  
9  
10 152 parents was used (childhood obesity cohort n=24 and comparison group n=164). The  
11  
12 153 rationale of treating SES as a composite variable was to capture more of the social context  
13  
14 154 and a potential inequality embedded there. Thus, by taking three variables into account  
15  
16 155 instead of one, we get a more wide and robust measure of SES. Maternal and paternal  
17  
18 156 educational level was categorized into compulsory school, upper secondary school, or  
19  
20 157 university degree. Annual disposable income was used to reflect maternal and paternal  
21  
22 158 economic capacity. The annual disposable income includes all taxable (direct labour income,  
23  
24 159 capital gains from shares etc.) and tax-free income (housing and child benefits, student aid  
25  
26 160 etc.), minus final tax and other negative transfers such as capital loss from shares and  
27  
28 161 properties. Disposable income from different years was converted to 2017 prices using the  
29  
30 162 Consumer Price Index for Sweden provided by Statistics Sweden ([www.scb.se/en](http://www.scb.se/en)). Income  
31  
32 163 was categorized into quartiles based on data from the parents in the comparison group. No  
33  
34 164 occupation was defined as either unemployment 6 months or more, or income from long-  
35  
36 165 term sick leave exceeding any income from the individual's gross salary. Individuals  
37  
38 166 considered to have an occupation included those registered as employed or having an income  
39  
40 167 from student grants/loan equivalent to full-time studies for at least one semester. Parental  
41  
42 168 SES was weighted according to maternal and paternal education (0, 1, 2), income (0, 1, 2, 3),  
43  
44 169 and occupational status (0, 1). The mean parental SES score (i.e. the sum of the mother's and  
45  
46 170 father's all SES indicators divided by two) was applied to their child. The SES-variable was  
47  
48  
49  
50  
51  
52  
53  
54  
55  
56  
57  
58  
59  
60

1  
2  
3 171 categorized into four levels; low SES (0 to 1.5 points), medium-low SES (2 to 3 points),  
4  
5 172 medium-high SES (3.5 to 4.5 points), and high SES (5 to 6 points).  
6  
7

8 173 The prevalence of both ADHD/ADD<sup>9</sup> and depression<sup>18</sup> is higher in children with obesity  
9  
10 174 and may negatively influence attained level of education<sup>9 16 17</sup>. ADHD/ADD and  
11  
12 175 anxiety/depression in children were identified based on diagnosis or dispensed prescribed  
13  
14 176 medication (S1 Table).  
15  
16

## 177 **Definition of covariates**

178 The migration background of children in Sweden may impact school achievements and is  
19  
20 179 therefore an important factor to control for in the analyses<sup>9 14</sup>. Migration background was  
21  
22 180 categorized as Nordic or non-Nordic. Nordic was defined as born in a Nordic country  
23  
24 181 (Sweden, Norway, Denmark, Finland, or Iceland) with one or two parents born in the Nordic.  
25  
26 182 Children were classified as non-Nordic if born outside the Nordic or born in the Nordic with  
27  
28 183 two parents born outside the Nordic. Other covariates included sex and age (continuous) at  
29  
30 184 start of obesity treatment.  
31  
32  
33  
34  
35  
36  
37  
38

## 39 **Statistical analysis**

40  
41  
42 186 Descriptive statistics are presented as means and confidence intervals (CI), medians and  
43  
44 187 interquartile ranges (IQR), or frequencies and percentages. Conditional logistic regression  
45  
46 188 was used to calculate odds ratios (OR's) with 99% CI for the main outcome, i.e. completing  
47  
48 189  $\geq 12$  school years. Conditional logistic regression was used above ordinary logistic regression  
49  
50 190 as the childhood obesity cohort and the comparison group were matched by several variables.  
51  
52  
53 191 Independent variables included in the adjusted analyses were migration background,  
54  
55  
56  
57  
58  
59  
60

1  
2  
3 192 ADHD/ADD, anxiety/depression, parental SES, and group (childhood obesity cohort or  
4  
5 193 comparison group) in analyses including both groups, otherwise stratified by group.  
6  
7 194 Interaction between childhood obesity and parental SES was tested. The association of each  
8  
9 195 SES indicator on the odds of completing  $\geq 12$  school years was also analysed separately for  
10  
11 196 mothers and fathers. Sensitivity analyses excluding individuals with ADHD/ADD or  
12  
13 197 anxiety/depression were performed.  
14  
15

16  
17 198 Secondary analyses were performed within the childhood obesity cohort to examine  
18  
19 199 associations between patient characteristics and completed educational level. In ordinary  
20  
21 200 logistic regressions, odds were adjusted for sex, migration background, parental SES, age  
22  
23 201 and BMI SDS at start of treatment, treatment response, ADHD/ADD, and  
24  
25 202 anxiety/depression. We tested for possible interaction between parental SES and treatment  
26  
27 203 response for the odds of completing  $\geq 12$  years of schooling.  
28  
29  
30

31  
32 204 As missing data on parental SES was rare in both groups (Table 1), records with missing data  
33  
34 205 were excluded from the analyses, i.e. data were not imputed. P-values  $< 0.01$  were considered  
35  
36 206 statistically significant. All analyses were performed using SAS statistical software (version  
37  
38 207 9.4, Cary, NC, USA).  
39  
40

41  
42 208  
43  
44

45 209  
46  
47

48 210  
49  
50

51 211  
52  
53  
54  
55  
56  
57  
58  
59  
60

212

**Table 1. Characteristics of the participants (n=22,670)**

|                                 | Childhood obesity cohort<br>(n=3,942) |            | Comparison group<br>(n=18,728) |            |
|---------------------------------|---------------------------------------|------------|--------------------------------|------------|
|                                 | n                                     | %          | n                              | %          |
| Female sex                      | 1,825                                 | 46.3       | 8,701                          | 46.5       |
| Nordic                          | 2,905                                 | 73.7       | 14,048                         | 75.0       |
| Age at end of follow-up (years) | 23.4*                                 | 21.4-26.3* | 23.4*                          | 21.5-26.3* |
| ADHD/ADD                        | 617                                   | 15.7       | 1,044                          | 5.6        |
| Anxiety/Depression              | 831                                   | 21.1       | 2,158                          | 11.5       |
| Parental SES                    |                                       |            |                                |            |
| Low                             | 867                                   | 22.0       | 2,700                          | 14.4       |
| Medium-low                      | 1,540                                 | 39.1       | 6,023                          | 32.1       |
| Medium-high                     | 1,159                                 | 29.4       | 6,587                          | 35.2       |
| High                            | 355                                   | 9.0        | 3,218                          | 17.2       |
| Missing                         | 21                                    | 0.5        | 200                            | 1.1        |
| Maternal education              |                                       |            |                                |            |
| Compulsory school               | 1,582                                 | 40.1       | 5,615                          | 30.0       |
| Upper secondary school          | 1,541                                 | 39.1       | 7,167                          | 38.3       |
| University degree               | 730                                   | 18.5       | 5,383                          | 28.7       |
| Missing                         | 89                                    | 2.3        | 563                            | 3.0        |
| Paternal education              |                                       |            |                                |            |
| Compulsory school               | 1,273                                 | 32.3       | 4,402                          | 23.5       |
| Upper secondary school          | 1,890                                 | 48.0       | 9,095                          | 48.6       |
| University degree               | 482                                   | 12.2       | 3,912                          | 20.9       |
| Missing                         | 297                                   | 7.5        | 1,319                          | 7.0        |
| Maternal income                 |                                       |            |                                |            |
| Q1                              | 1,173                                 | 29.8       | 4,887                          | 26.1       |
| Q2                              | 1,281                                 | 32.5       | 5,843                          | 31.2       |
| Q3                              | 931                                   | 23.6       | 4,585                          | 24.5       |
| Q4                              | 486                                   | 12.3       | 2,988                          | 15.9       |
| Missing                         | 71                                    | 1.8        | 425                            | 2.3        |
| Paternal income                 |                                       |            |                                |            |
| Q1                              | 1,127                                 | 28.6       | 3,917                          | 20.9       |
| Q2                              | 760                                   | 19.3       | 3,128                          | 16.7       |
| Q3                              | 889                                   | 22.5       | 4,389                          | 23.4       |
| Q4                              | 864                                   | 21.9       | 5,986                          | 32.0       |
| Missing                         | 302                                   | 7.7        | 1,308                          | 7.0        |
| Maternal occupational status    |                                       |            |                                |            |
| Occupation                      | 2,963                                 | 75.2       | 15,405                         | 82.2       |
| No occupation                   | 916                                   | 23.2       | 2,956                          | 15.8       |
| Missing                         | 63                                    | 1.6        | 367                            | 2.0        |
| Paternal occupational status    |                                       |            |                                |            |
| Occupation                      | 2,868                                 | 72.8       | 14,906                         | 79.6       |
| No occupation                   | 800                                   | 20.3       | 2,627                          | 14.0       |
| Missing                         | 274                                   | 6.9        | 1,195                          | 6.4        |

Data are n % if not else stated. Abbreviation: SES, socioeconomic status; Q, quartile.

\*Median with interquartile ranges

213

214

## 215 **Results**

216 In total, 3,942 individuals in the childhood obesity cohort and 18,728 individuals in the  
217 comparison group were included in the study (Table 1). In both groups, 46% of the  
218 participants were girls and the median age at follow-up was 23.4 years. The proportions of  
219 individuals of Nordic origin were similar in both groups (73.7% vs. 75.0%;  $p=0.02$ ). Despite  
220 the groups being matched for living area, a greater proportion of children with obesity grew  
221 up in households with low SES compared with the comparison group (22.0% vs. 14.4%;  
222  $p<0.0001$ ).

### 224 **Parental SES, childhood obesity and the child's attained level of** 225 **education**

226 In the childhood obesity cohort, 56.7% completed  $\geq 12$  years in school, compared with 74.4%  
227 in the comparison group. Girls more frequently completed  $\geq 12$  years of schooling than boys  
228 in both groups (S2 Table).

229 Higher parental SES was positively associated with completion of  $\geq 12$  years of schooling in  
230 both the childhood obesity cohort and in the comparison group (Fig 2). The odds were more  
231 than five times higher among children growing up in high SES households compared with  
232 those growing up in low SES households (Table 2). However, even when taking parental  
233 SES and other risk factors into account, individuals in the childhood obesity cohort were  
234 almost half as likely to complete  $\geq 12$  school years compared with those in the comparison  
235 group (Table 2). The adjusted odds ratio (<sup>a</sup>OR) [99% CI] to complete  $\geq 12$  years of schooling

1  
2  
3 236 for the childhood obesity cohort versus the comparison group were lower in the higher level  
4  
5 237 of SES: <sup>a</sup>OR low parental SES = 0.69 [0.50 to 0.95], p=0.0026; <sup>a</sup>OR medium-low parental  
6  
7 238 SES = 0.59 [0.48 to 0.72], p<0.0001; <sup>a</sup>OR medium-high parental SES = 0.46 [0.35 to 0.60],  
8  
9 239 p<0.0001; <sup>a</sup>OR high parental SES = 0.27 [0.14 to 0.54], p<0.0001. P-value for interaction  
10  
11 240 test for childhood obesity and parental SES reaches a p of 0.0015.  
12  
13  
14

15 241 The association of parental SES on school performance was more pronounced in the  
16  
17 242 comparison group than in the childhood obesity cohort. For example, stratified analyses show  
18  
19 243 that adjusted OR of completing  $\geq 12$  years in school in low SES compared with high SES in  
20  
21 244 the comparison group was 0.17 (99% CI 0.14 to 0.21, p<0.0001) and in the childhood obesity  
22  
23 245 cohort 0.31 (99% CI 0.22 to 0.45, p<0.0001). Regardless of how we divide the childhood  
24  
25 246 obesity population (into age- or calendar year at start of obesity treatment, SES sub-scores),  
26  
27 247 large differences between the two groups remain (Table 2 and S3 Table).  
28  
29  
30  
31

32 248

33  
34 249 **Fig 2. Percentage of individuals completing  $\geq 12$  years of schooling by SES level in the**  
35  
36 250 **childhood obesity cohort (n=3,921, solid bars) and the comparison group (n=18,528,**  
37  
38 251 **dotted bars).**  
39  
40  
41  
42  
43  
44  
45  
46  
47  
48  
49  
50  
51  
52  
53  
54  
55  
56  
57  
58  
59  
60



**Table 2. Crude and adjusted odds ratio (99% CI); p-value of subjects completing ≥12 years of schooling**

|                                               | Crude estimates              | Model 1, n=22 449            | Model 2, n=20 610            | Model 3, n=20 691            | Model 4, n=20 885            | Model 5, n=20 420            |
|-----------------------------------------------|------------------------------|------------------------------|------------------------------|------------------------------|------------------------------|------------------------------|
| Childhood obesity cohort vs. comparison group | 0.44 (0.40 to 0.48); <0.0001 | 0.57 (0.51 to 0.63); <0.0001 | 0.55 (0.50 to 0.62); <0.0001 | 0.54 (0.48 to 0.61); <0.0001 | 0.53 (0.48 to 0.59); <0.0001 | 0.59 (0.52 to 0.66); <0.0001 |
| Non-Nordic vs. Nordic                         | 0.70 (0.63 to 0.78); <0.0001 | 0.85 (0.75 to 0.97); 0.001   | 0.77 (0.67 to 0.88); <0.0001 | 0.87 (0.76 to 0.99); 0.0068  | 0.81 (0.71 to 0.92); <0.0001 | 0.97 (0.84 to 1.12); 0.5687  |
| ADHD/ADD vs. non-ADHD/ADD                     | 0.19 (0.17 to 0.23); <0.0001 | 0.28 (0.24 to 0.33); <0.0001 | 0.27 (0.22 to 0.33); <0.0001 | 0.27 (0.22 to 0.32); <0.0001 | 0.26 (0.22 to 0.31); <0.0001 | 0.28 (0.23 to 0.34); <0.0001 |
| Anxiety/depression vs. no anxiety/depression  | 0.31 (0.27 to 0.35); <0.0001 | 0.39 (0.34 to 0.45); <0.0001 | 0.36 (0.31 to 0.41); <0.0001 | 0.38 (0.33 to 0.44); <0.0001 | 0.39 (0.33 to 0.44); <0.0001 | 0.36 (0.31 to 0.42); <0.0001 |
| Parental SES                                  |                              |                              |                              |                              |                              |                              |
| Medium-low vs. low parental SES               | 1.74 (1.54 to 1.97); <0.0001 | 1.69 (1.48 to 1.93); <0.0001 |                              |                              |                              |                              |
| Medium-high vs. low parental SES              | 3.33 (2.92 to 3.81); <0.0001 | 2.99 (2.59 to 3.45); <0.0001 |                              |                              |                              |                              |
| High vs. low parental SES                     | 6.21 (5.19 to 7.44); <0.0001 | 5.40 (4.45 to 6.55); <0.0001 |                              |                              |                              |                              |
| Maternal education                            |                              |                              |                              |                              |                              |                              |
| Upper secondary school vs. compulsory school  | 1.88 (1.69 to 2.08); <0.0001 |                              | 1.63 (1.45 to 1.83); <0.0001 |                              |                              | 1.51 (1.34 to 1.71); <0.0001 |
| University degree vs. compulsory school       | 3.23 (2.86 to 3.66); <0.0001 |                              | 2.45 (2.12 to 2.83); <0.0001 |                              |                              | 2.17 (1.87 to 2.53); <0.0001 |
| Paternal education                            |                              |                              |                              |                              |                              |                              |
| Upper secondary school vs. compulsory school  | 1.88 (1.69 to 2.09); <0.0001 |                              | 1.58 (1.40 to 1.77); <0.0001 |                              |                              | 1.42 (1.26 to 1.60); <0.0001 |
| University degree vs. compulsory school       | 3.07 (2.66 to 3.55); <0.0001 |                              | 2.09 (1.77 to 2.45); <0.0001 |                              |                              | 1.81 (1.53 to 2.15); <0.0001 |
| Maternal income                               |                              |                              |                              |                              |                              |                              |
| Q2 vs. Q1                                     | 1.28 (1.15 to 1.43); <0.0001 |                              |                              | 1.25 (1.10 to 1.41); <0.0001 |                              | 1.07 (0.93 to 1.23); 0.2065  |
| Q3 vs. Q1                                     | 1.45 (1.28 to 1.63); <0.0001 |                              |                              | 1.35 (1.17 to 1.55); <0.0001 |                              | 1.05 (0.90 to 1.23); 0.4224  |
| Q4 vs. Q1                                     | 1.86 (1.60 to 2.15); <0.0001 |                              |                              | 1.52 (1.28 to 1.81); <0.0001 |                              | 1.07 (0.88 to 1.28); 0.3831  |
| Paternal income                               |                              |                              |                              |                              |                              |                              |
| Q2 vs. Q1                                     | 1.36 (1.19 to 1.55); <0.0001 |                              |                              | 1.31 (1.13 to 1.51); <0.0001 |                              | 1.07 (0.91 to 1.26); 0.2740  |
| Q3 vs. Q1                                     | 1.90 (1.67 to 2.17); <0.0001 |                              |                              | 1.70 (1.48 to 1.96); <0.0001 |                              | 1.24 (1.05 to 1.46); 0.0009  |
| Q4 vs. Q1                                     | 2.95 (2.58 to 3.36); <0.0001 |                              |                              | 2.47 (2.13 to 2.86); <0.0001 |                              | 1.58 (1.33 to 1.88); <0.0001 |
| Maternal occupational status                  |                              |                              |                              |                              |                              |                              |
| Occupation vs. no occupation                  | 2.15 (1.92 to 2.40); <0.0001 |                              |                              |                              | 1.72 (1.51 to 1.96); <0.0001 | 1.38 (1.19 to 1.61); <0.0001 |
| Paternal occupational status                  |                              |                              |                              |                              |                              |                              |
| Occupation vs. no occupation                  | 2.24 (1.99 to 2.52); <0.0001 |                              |                              |                              | 1.79 (1.57 to 2.04); <0.0001 | 1.41 (1.20 to 1.65); <0.0001 |

Abbreviations: CI, confidence interval; SES, socioeconomic status.

Model 1: Variables included were group (childhood obesity cohort vs. comparison group), migration background, ADHD/ADD, anxiety/depression, and parental SES

Model 2: Variables included were group, migration background, ADHD/ADD, anxiety/depression, maternal-, and paternal education

Model 3: Variables included were group, migration background, ADHD/ADD, anxiety/depression, maternal-, and paternal income

Model 4: Variables included were group, migration background, ADHD/ADD, anxiety/depression, maternal-, and paternal occupational status.

Model 5: Variables included were group, migration background, ADHD/ADD, anxiety/depression, maternal-, and paternal education, income, and occupational status.

253 Of note, having a non-Nordic-, compared to a Nordic background, was associated with  
254 reduced odds to complete 12 or more years of schooling (Table 2). This was however not  
255 observed in boys in the childhood obesity cohort ( $p=0.68$ ). Further, excluding individuals  
256 with ADHD/ADD or anxiety/depression in sensitivity analyses, did not alter the association  
257 between childhood obesity and attained level of education.

## 258 **Degree of obesity and treatment response on completed** 259 **educational level in children with obesity**

260 In the childhood obesity cohort, the mean age at start of treatment was 13.5 years (99% CI:  
261 13.45 to 13.62) and the mean BMI SDS was +2.91 (99% CI: 2.89 to 2.92). The median  
262 treatment duration was 2.83 years (IQR: 1.86 to 4.42) and the mean treatment response,  
263 calculated using BMI SDS from the first to the last clinical visit, was -0.13 (99% CI: -0.15  
264 to -0.10,  $n=2,709$ , 68.7%, dropouts excluded). At baseline, 50.7% had obesity and 49.3% had  
265 morbid obesity. At last measured weight and height, 33.4% had obesity and 47.2% had  
266 morbid obesity, while 19.4% of the children no longer had obesity (dropouts excluded).

267 A greater degree of obesity at start of treatment lowered the odds of completing  $\geq 12$  years of  
268 schooling,  $^a\text{OR}$  [99% CI] = 0.51 [0.40 to 0.64],  $p<0.0001$ , per one unit increase in BMI SDS,  
269 while age at start of obesity treatment did not influence the outcome (Table 3). Treatment  
270 response was categorized as good response ( $n=847$ ), no response ( $n=1\ 315$ ), poor response  
271 ( $n=547$ ), and dropouts ( $n=1,233$ ). Of those with good treatment response, 67% completed  
272  $\geq 12$  years in school compared with 58%, 52%, and 50% in the groups with no or poor  
273 response, and dropouts, respectively ( $p<0.0001$ ). Within all SES groups, except for high SES,  
274 greater treatment response resulted in higher odds of completing  $\geq 12$  years in school (Fig 3).

1  
2  
3 275 Dropouts were less likely to complete  $\geq 12$  years in school compared with non-responders  
4  
5 276 (Table 3) but this was not observed in the high SES group (Fig 3). Duration of treatment  
6  
7 277 differed between children with good and poor treatment response (3.5 vs. 4.0 years;  
8  
9 278  $p < 0.0001$ ). In the childhood obesity cohort, the association between parental SES and odds  
10  
11 279 of completing  $\geq 12$  years of schooling was not modified by treatment response ( $p = 0.603$ ).  
12  
13  
14  
15  
16  
17  
18  
19  
20  
21  
22  
23  
24  
25  
26  
27  
28  
29  
30  
31  
32  
33  
34  
35  
36  
37  
38  
39  
40  
41  
42  
43  
44  
45  
46  
47  
48  
49  
50  
51  
52  
53  
54  
55  
56  
57  
58  
59  
60

For peer review only

**Table 3. Crude and adjusted odds ratios of completing  $\geq 12$  years of schooling in the childhood obesity cohort**

|                                              | Odds ratio (99% CI) performed with ordinary logistic regression; p value |                              |                              |
|----------------------------------------------|--------------------------------------------------------------------------|------------------------------|------------------------------|
|                                              | Crude estimates                                                          | Model 1, n=3 921             | Model 2, n=3 575             |
| Sex (girls vs. boys)                         | 1.26 (1.06 to 1.48); 0.0004                                              | 1.30 (1.08 to 1.56); 0.0002  | 1.29 (1.06 to 1.56); 0.0008  |
| Migration background (non-Nordic vs. Nordic) | 0.78 (0.65 to 0.94); 0.0006                                              | 0.74 (0.60 to 0.91); 0.0002  | 0.69 (0.55 to 0.87); <0.0001 |
| ADHD/ADD (yes vs. no)                        | 0.31 (0.25 to 0.40); <0.0001                                             | 0.35 (0.27 to 0.45); <0.0001 | 0.33 (0.26 to 0.44); <0.0001 |
| Anxiety/depression (yes vs. no)              | 0.43 (0.35 to 0.53); <0.0001                                             | 0.45 (0.36 to 0.57); <0.0001 | 0.43 (0.34 to 0.55); <0.0001 |
| BMI SDS at start of treatment                | 0.47 (0.38 to 0.58); <0.0001                                             | 0.51 (0.40 to 0.64); <0.0001 | 0.48 (0.38 to 0.62); <0.0001 |
| Age at start of treatment                    | 0.96 (0.93 to 1.01); 0.0234                                              | 1.01 (0.96 to 1.06); 0.60    | 1.01 (0.96 to 1.06); 0.805   |
| Treatment response                           |                                                                          |                              |                              |
| Good response vs. no response                | 1.46 (1.15 to 1.85); <0.0001                                             | 1.34 (1.04 to 1.72); 0.0031  | 1.28 (0.98 to 1.67); 0.0182  |
| Poor response vs. no response                | 0.78 (0.60 to 1.02); 0.0167                                              | 0.72 (0.54 to 0.96); 0.0028  | 0.71 (0.53 to 0.96); 0.003   |
| Dropouts vs. no response                     | 0.71 (0.58 to 0.87); <0.0001                                             | 0.69 (0.55 to 0.86); <0.0001 | 0.68 (0.54 to 0.87); <0.0001 |
| Parental SES                                 |                                                                          |                              |                              |
| Medium-low vs. low parental SES              | 1.63 (1.31 to 2.03); <0.0001                                             | 1.56 (1.24 to 1.98); <0.0001 |                              |
| Medium-high vs. low parental SES             | 2.40 (1.90 to 3.05); <0.0001                                             | 2.19 (1.69 to 2.83); <0.0001 |                              |
| High vs. low parental SES                    | 2.99 (2.11 to 4.22); <0.0001                                             | 2.83 (1.95 to 4.12); <0.0001 |                              |
| Maternal education                           |                                                                          |                              |                              |
| Upper secondary school vs. compulsory school | 1.74 (1.44 to 2.09); <0.0001                                             |                              | 1.57 (1.27 to 1.94); <0.0001 |
| University degree vs. compulsory school      | 2.47 (1.94 to 3.16); <0.0001                                             |                              | 2.23 (1.67 to 2.98); <0.0001 |
| Paternal education                           |                                                                          |                              |                              |
| Upper secondary school vs. compulsory school | 1.48 (1.23 to 1.79); <0.0001                                             |                              | 1.26 (1.03 to 1.55); 0.004   |
| University degree vs. compulsory school      | 1.92 (1.44 to 2.56); <0.0001                                             |                              | 1.41 (1.01 to 1.95); 0.0076  |

Abbreviations: CI, confidence interval; BMI SDS, BMI standard deviation score; SES, socioeconomic status.

Model 1: Variables included were sex, migration background, ADHD/ADD, anxiety/depression, BMI SDS- and age at start of treatment, treatment response, and parental SES.

Model 2: Variables included were sex, migration background, ADHD/ADD, anxiety/depression, BMI SDS- and age at start of treatment, treatment response, maternal-, and paternal education.

280

1  
2  
3 281 **Fig 3. Crude percentage of individuals with obesity in childhood (n=3,921) completing  $\geq 12$**   
4  
5 282 **school years by parental SES and treatment response (black bars=dropouts; white**  
6  
7 283 **bars=poor response; striped bars=no response; dotted bars=good response). p=p for**  
8  
9 284 **trend; n=refers to number of individuals in each category.**  
10  
11  
12  
13 285

## 16 286 **Discussion**

17  
18  
19  
20 287 In this prospective cohort study, we have compared level of education among individuals  
21  
22 288 recorded in the Swedish Childhood Obesity Treatment Register, and a comparison group  
23  
24 289 matched by sex, year of birth, and living area. Individuals in the childhood obesity cohort were  
25  
26 290 half as likely to complete 12 or more years of schooling, independently of parental  
27  
28 291 socioeconomic status (SES).

29  
30  
31  
32 292 Among individuals from high SES families, those in the childhood obesity cohort were  
33  
34 293 approximately one third as likely to complete  $\geq 12$  years of schooling as individuals from high  
35  
36 294 SES families in the comparison group. Furthermore, our results indicate that parental SES was  
37  
38 295 more important to complete  $\geq 12$  school years in the comparison group than in the childhood  
39  
40 296 obesity cohort. An association between obesity and impaired academic achievements has been  
41  
42 297 demonstrated before.<sup>8 9</sup> To which extent other psychosocial factors contribute to this finding  
43  
44 298 has not been evaluated. It is well established that low parental SES,<sup>13-15</sup> immigrant background,<sup>9</sup>  
45  
46 299 <sup>14</sup> ADHD/ADD,<sup>9 17</sup> and depression,<sup>9 14 16</sup> may negatively affect performance in school. These  
47  
48 300 factors are also overrepresented in the paediatric population with obesity. In this study, we can  
49  
50 301 confirm that low parental SES, neuropsychiatric disorders, and anxiety/depression are more  
51  
52 302 common in children with obesity and contribute to the decreased odds of completing  $\geq 12$  school  
53  
54 303 years. However, we found that obesity in childhood is a considerable risk factor for not  
55  
56  
57  
58  
59  
60

1  
2  
3 304 completing  $\geq 12$  years of schooling even after taking these and other important risk factors into  
4  
5 305 account.

## 306 **Obesity treatment outcome and educational level**

307 We identified a positive association between weight-loss during obesity treatment and  
308 completed educational level, which confirms our previously reported data unadjusted for SES  
309 <sup>9</sup>. Children with good treatment response, compared with those with no response, were more  
310 likely to complete  $\geq 12$  school years in all SES groups. A decrease of 0.25 BMI SDS, that has  
311 previously been shown to improve metabolic health <sup>27</sup>, we can now also show may have a  
312 positive association on completing  $\geq 12$  years of schooling. However, the positive effects of  
313 successful obesity treatment did not compensate for the observed SES differences on attained  
314 level of education.

315 In Sweden, 12 years of schooling is not mandatory, but the long-term social effects are  
316 considerable for those who fail. It has been estimated that 50% of those who fail to complete  
317  $\geq 12$  school years face a situation of being left outside the society with poor psychosocial health  
318 and large costs for the society <sup>29</sup>. Thus, it is possible that school failure will further worsen the  
319 health perspective of adolescents with obesity.

## 320 **Potential mechanisms between obesity, weight loss, and school** 321 **performance**

322 The mechanisms by which obesity influences school performance are unclear but are likely  
323 multifactorial and complex. Possible mechanisms may include psychosocial aspects such as  
324 stigma<sup>30</sup> and increased risk for anxiety and depression.<sup>7</sup> Physiological mechanisms may be  
325 mediated by anatomical changes such as atrophy of the frontal lobe and reduced hippocampal  
326 volume have been demonstrated in individuals with obesity.<sup>31</sup> Some of the reported cognitive

1  
2  
3 327 dysfunctions in children and adolescents with obesity include slower response times when  
4  
5 328 performing visuospatial attention tasks,<sup>32</sup> diminished executive functions, such as working  
6  
7 329 memory,<sup>33</sup> and slower cognitive performance speed<sup>34</sup>. In addition, obesity-related  
8  
9 330 comorbidities such as insulin resistance,<sup>35</sup> type 2 diabetes mellitus,<sup>36</sup> chronic low-grade  
10  
11 331 inflammation,<sup>37</sup> and the metabolic syndrome<sup>38</sup> have also been associated with impaired  
12  
13 332 executive function, memory performance, attention, and cognitive flexibility. A high fat diet in  
14  
15 333 rodents demonstrated detrimental effects on memory and executive functions.<sup>31</sup>

16  
17 334 At least some of these effects seem to be reversible, which may add to the positive associations  
18  
19 335 we observed of weight loss on school outcome. Weight loss may have a direct positive effect  
20  
21 336 on cognitive functions.<sup>39</sup> Extensive weight loss via bariatric surgery improves insulin sensitivity  
22  
23 337 and decreases systematic inflammation,<sup>40</sup> and it has been suggested that these factors affect  
24  
25 338 cognitive functions.<sup>41</sup>

26  
27 339 However, children with obesity are often stigmatized,<sup>42</sup> have a low self-esteem, and are exposed  
28  
29 340 to bullying and social exclusion.<sup>43</sup> All these factors have most likely a negative impact on school  
30  
31 341 performance. In contrast, a strong social network is most probably an important factor both for  
32  
33 342 good treatment response and achievement in school. An inverse association has been observed  
34  
35 343 between familial social support and child weight status<sup>44</sup> Thus, it is likely that both negative  
36  
37 344 social effects of obesity and obesity-related morbidity, as well as genetic factors, contribute to  
38  
39 345 the adverse association of childhood obesity on completed educational level.

## 346 **Limitations**

347 Using longitudinal data from several national registers provided an opportunity to assess the  
348 impact of obesity on completed educational level, adjusted for several important confounders.  
349 Data on both exposure and outcome were prospectively collected and defined according to  
350 standardized international classifications.<sup>19 26</sup>

1  
2  
3 351 However, some important limitations should be recognized. We did not have anthropometric  
4  
5 352 data on children in the comparison group. There is no representative national data on children  
6  
7 353 with obesity in Sweden. As our comparison group includes children with obesity, although  
8  
9 354 likely less than 1% according to obesity diagnoses found in the National Patient Register, odds  
10  
11 355 of lower level of education associated with obesity might be underestimated. It is also important  
12  
13 356 to consider that children receiving obesity treatment may not be representative of all children  
14  
15 357 with obesity. However, such bias is reduced as a large proportion of children are referred to  
16  
17 358 treatment from school. It should be noted that parental SES was based on data from one specific  
18  
19 359 year in the child's life and not over the child's entire adolescent lifetime, and that the SES  
20  
21 360 indicators used may not reflect the whole SES spectrum. In addition, the impact of anxiety and  
22  
23 361 depression on educational level may be underestimated since these conditions often are under-  
24  
25 362 diagnosed. Lastly, factors such as free education, school lunches, and students' health care may  
26  
27 363 have an impact on the generalizability of our data to other populations.  
28  
29  
30  
31  
32  
33

## 34 **Conclusion**

35  
36  
37 365 In this longitudinal, population-based study, individuals with obesity in childhood were less  
38  
39 366 likely to complete 12 or more years of schooling, compared with a group from the general  
40  
41 367 population. The odds associated with obesity remained significantly increased even after taking  
42  
43 368 parental SES and other important risk factors, such as ADHD, into consideration. The  
44  
45 369 underlying mechanisms are unclear but previous studies indicate that the effects of obesity both  
46  
47 370 involve psychosocial effects and cognitive functions. The negative impact of childhood obesity  
48  
49 371 on educational level could partly be reversed by successful obesity treatment in childhood.  
50  
51 372 Results from this study underline the wide effects of childhood obesity on public health and the  
52  
53 373 importance of continued efforts to reduce the prevalence of obesity in children. It is of clinical  
54  
55  
56  
57  
58  
59  
60



1  
2  
3 374 importance to increase awareness of the potential need for extra support at school of children  
4  
5 375 and adolescents with obesity.  
6  
7

## 8 9 376 **Acknowledgements**

10  
11  
12 377 The authors would like to thank all local health care professionals in Sweden working with  
13  
14 378 children and adolescents with obesity and their valuable work with BORIS, and the BORIS  
15  
16  
17 379 steering committee for establishing and maintaining the register.  
18  
19

20 380

## 21 22 23 381 **Author contributions**

24  
25  
26  
27 382 Conceptualization: Louise Lindberg, Pernilla Danielsson, Martina Persson, Claude Marcus,  
28  
29 383 Emilia Hagman.

30  
31  
32 384 Data curation: Louise Lindberg.

33  
34 385 Formal analysis: Louise Lindberg, Emilia Hagman.

35  
36 386 Funding acquisition: Louise Lindberg, Claude Marcus, Emilia Hagman.

37  
38 387 Methodology: Louise Lindberg, Emilia Hagman.

39  
40 388 Project administration: Louise Lindberg, Emilia Hagman.

41  
42  
43 389 Supervision: Martina Persson, Emilia Hagman, Pernilla Danielsson, Claude Marcus.

44  
45 390 Writing – original draft: Louise Lindberg.

46  
47  
48 391 Writing – review & editing: Louise Lindberg, Pernilla Danielsson, Martina Persson, Claude

49  
50 392 Marcus, Emilia Hagman.

51  
52 393

## 53 394 **Funding statement**

54 395 This study was supported by funds to LL by Crown Princess Lovisa's Foundation (2017-  
55  
56  
57 396 00348), Samariten Foundation (2017-0305), the Stockholm FreeMason Foundation for  
58  
59 397 Children's Welfare, Sällskapet Barnavård, Anna-Lisa och Arne Gustafssons Foundation,

1  
2  
3 398 Solstickan Foundation and Sven Jerring Foundation. EH was supported by the Swedish Society  
4  
5 399 for Medical Research, Fredrik and Ingrid Thuring's Foundation (2017-00309) and Magnus  
6  
7 400 Bergvall Foundation (2017-02113), and CM by the Swedish Heart and Lung Foundation  
8  
9 401 (20150790).

## 402 **Data Sharing statement**

13  
14  
15  
16 403 The data that support the findings of this study contains sensitive information. Restrictions  
17  
18 404 therefore apply to the availability of these data, which were used under license for the current  
19  
20 405 study, and so are not publicly available. According to Swedish law and the General Data  
21  
22 406 Protection Regulation, the authors are not permitted to share the datasets used in this study with  
23  
24 407 third parties. Given that an ethical approval is obtained, any individual may apply for data from  
25  
26 408 Statistics Sweden via [information@scb.se](mailto:information@scb.se), the Swedish National Board of Health and Welfare  
27  
28 409 via [registerservice@socialstyrelsen.se](mailto:registerservice@socialstyrelsen.se), and the Swedish Childhood Obesity Treatment Register  
29  
30 410 via <http://www.e-boris.se/kontaktuppgifter/>.

## 36 411 **Competing interests**

37  
38  
39 412 All authors have completed the ICMJE uniform disclosure form at  
40  
41 413 [www.icmje.org/coi\\_disclosure.pdf](http://www.icmje.org/coi_disclosure.pdf) and declare: no support from any organisation for the  
42  
43 414 submitted work; no financial relationships with any organisations that might have an interest in  
44  
45 415 the submitted work in the previous three years; no other relationships or activities that could  
46  
47 416 appear to have influenced the submitted.

417 **References**

- 418 1. Abarca-Gómez L, Abdeen ZA, Hamid ZA, et al. Worldwide trends in body-mass index, underweight,  
419 overweight, and obesity from 1975 to 2016: a pooled analysis of 2416 population-based  
420 measurement studies in 128.9 million children, adolescents, and adults. *The Lancet* 2017 doi:  
421 10.1016/S0140-6736(17)32129-3
- 422 2. Hagman E, Danielsson P, Brandt L, et al. Association between impaired fasting glycaemia in  
423 pediatric obesity and type 2 diabetes in young adulthood. *Nutr Diabetes* 2016;6(8):e227. doi:  
424 10.1038/nutd.2016.34 [published Online First: 2016/08/23]
- 425 3. Hagman E, Danielsson P, Elimam A, et al. The effect of weight loss and weight gain on blood  
426 pressure in children and adolescents with obesity. *Int J Obes (Lond)* 2019;43(10):1988-94.  
427 doi: 10.1038/s41366-019-0384-2 [published Online First: 2019/06/04]
- 428 4. Lindberg L, Danielsson P, Persson M, et al. Association of childhood obesity with risk of early all-  
429 cause and cause-specific mortality: A Swedish prospective cohort study. *PLoS medicine*  
430 2020;17(3):e1003078. doi: 10.1371/journal.pmed.1003078 [published Online First:  
431 2020/03/19]
- 432 5. Reilly JJ, Kelly J. Long-term impact of overweight and obesity in childhood and adolescence on  
433 morbidity and premature mortality in adulthood: systematic review. *Int J Obes (Lond)*  
434 2011;35(7):891-8. doi: 10.1038/ijo.2010.222
- 435 6. Viner RM, Cole TJ. Adult socioeconomic, educational, social, and psychological outcomes of  
436 childhood obesity: a national birth cohort study. *BMJ* 2005;330(7504):1354. doi:  
437 10.1136/bmj.38453.422049.E0 [published Online First: 2005/05/20]
- 438 7. Lindberg L, Hagman E, Danielsson P, et al. Anxiety and depression in children and adolescents with  
439 obesity: a nationwide study in Sweden. *BMC medicine* 2020;18(1):30. doi: 10.1186/s12916-  
440 020-1498-z [published Online First: 2020/02/23]
- 441 8. Laitinen J, Power C, Ek E, et al. Unemployment and obesity among young adults in a northern  
442 Finland 1966 birth cohort. *International journal of obesity and related metabolic disorders :  
443 journal of the International Association for the Study of Obesity* 2002;26(10):1329-38. doi:  
444 10.1038/sj.ijo.0802134
- 445 9. Hagman E, Danielsson P, Brandt L, et al. Childhood Obesity, Obesity Treatment Outcome, and  
446 Achieved Education: A Prospective Cohort Study. *The Journal of adolescent health : official  
447 publication of the Society for Adolescent Medicine* 2017 doi:  
448 10.1016/j.jadohealth.2017.04.009 [published Online First: 2017/07/12]
- 449 10. Karnehed N, Rasmussen F, Hemmingsson T, et al. Obesity and attained education: cohort study of  
450 more than 700,000 Swedish men. *Obesity* 2006;14(8):1421-28.
- 451 11. French SA, Wall M, Corbeil T, et al. Obesity in Adolescence Predicts Lower Educational Attainment  
452 and Income in Adulthood: The Project EAT Longitudinal Study. *Obesity (Silver Spring)*  
453 2018;26(9):1467-73. doi: 10.1002/oby.22273 [published Online First: 2018/09/19]
- 454 12. Shrewsbury V, Wardle J. Socioeconomic status and adiposity in childhood: a systematic review of  
455 cross-sectional studies 1990-2005. *Obesity (Silver Spring)* 2008;16(2):275-84. doi:  
456 10.1038/oby.2007.35 [published Online First: 2008/02/02]
- 457 13. Koivusilta LK, West P, Saaristo VM, et al. From childhood socio-economic position to adult  
458 educational level - do health behaviours in adolescence matter? A longitudinal study. *BMC  
459 public health* 2013;13:711. doi: 10.1186/1471-2458-13-711
- 460 14. Kark M, Hjern A, Rasmussen F. Poor school performance is associated with a larger gain in body  
461 mass index during puberty. *Acta Paediatr* 2014;103(2):207-13. doi: 10.1111/apa.12471
- 462 15. DeGarmo DS, Forgatch MS, Martinez CR, Jr. Parenting of divorced mothers as a link between  
463 social status and boys' academic outcomes: unpacking the effects of socioeconomic status.  
464 *Child development* 1999;70(5):1231-45. [published Online First: 1999/11/05]

- 1  
2  
3 465 16. Freeman A, Tyrovolas S, Koyanagi A, et al. The role of socio-economic status in depression: results  
4 466 from the COURAGE (aging survey in Europe). *BMC public health* 2016;16(1):1098. doi:  
5 467 10.1186/s12889-016-3638-0 [published Online First: 2016/10/21]  
6 468 17. Scholtens S, Rydell AM, Yang-Wallentin F. ADHD symptoms, academic achievement, self-  
7 469 perception of academic competence and future orientation: a longitudinal study.  
8 470 *Scandinavian journal of psychology* 2013;54(3):205-12. doi: 10.1111/sjop.12042 [published  
9 471 Online First: 2013/03/21]  
11 472 18. Quek YH, Tam WWS, Zhang MWB, et al. Exploring the association between childhood and  
12 473 adolescent obesity and depression: a meta-analysis. *Obesity reviews : an official journal of*  
13 474 *the International Association for the Study of Obesity* 2017;18(7):742-54. doi:  
14 475 10.1111/obr.12535 [published Online First: 2017/04/13]  
15 476 19. Cole TJ, Lobstein T. Extended international (IOTF) body mass index cut-offs for thinness,  
16 477 overweight and obesity. *Pediatr Obes* 2012;7(4):284-94. doi: 10.1111/j.2047-  
17 478 6310.2012.00064.x  
19 479 20. Hagman E, Danielsson P, Lindberg L, et al. Paediatric obesity treatment during 14 years in  
20 480 Sweden: Lessons from the Swedish Childhood Obesity Treatment Register-BORIS. *Pediatr*  
21 481 *Obes* 2020:e12626. doi: 10.1111/ijpo.12626 [published Online First: 2020/02/20]  
22 482 21. Ludvigsson JF, Otterblad-Olausson P, Pettersson BU, et al. The Swedish personal identity number:  
23 483 possibilities and pitfalls in healthcare and medical research. *European journal of*  
24 484 *epidemiology* 2009;24(11):659-67. doi: 10.1007/s10654-009-9350-y  
25 485 22. Ludvigsson JF, Almqvist C, Bonamy AK, et al. Registers of the Swedish total population and their  
26 486 use in medical research. *European journal of epidemiology* 2016;31(2):125-36. doi:  
27 487 10.1007/s10654-016-0117-y [published Online First: 2016/01/16]  
28 488 23. Ludvigsson JF, Andersson E, Ekblom A, et al. External review and validation of the Swedish  
29 489 national inpatient register. *BMC public health* 2011;11:450. doi: 10.1186/1471-2458-11-450  
30 490 [published Online First: 2011/06/11]  
31 491 24. Wallerstedt SM, Wettermark B, Hoffmann M. The First Decade with the Swedish Prescribed Drug  
32 492 Register - A Systematic Review of the Output in the Scientific Literature. *Basic & clinical*  
33 493 *pharmacology & toxicology* 2016;119(5):464-69. doi: 10.1111/bcpt.12613 [published Online  
34 494 First: 2016/04/27]  
35 495 25. Brooke HL, Talback M, Hornblad J, et al. The Swedish cause of death register. *European journal of*  
36 496 *epidemiology* 2017;32(9):765-73. doi: 10.1007/s10654-017-0316-1 [published Online First:  
37 497 2017/10/07]  
38 498 26. UNESCO. International standard classification of education: Isced 1997. Re-edition. Paris: UNESCO  
39 499 Institute for Statistics. 2011  
40 500 27. Ford AL, Hunt LP, Cooper A, et al. What reduction in BMI SDS is required in obese adolescents to  
41 501 improve body composition and cardiometabolic health? *Archives of disease in childhood*  
42 502 2010;95(4):256-61. doi: 10.1136/adc.2009.165340 [published Online First: 2009/12/08]  
43 503 28. Hagman E, Danielsson P, Elimam A, et al. The effect of weight loss and weight gain on blood  
44 504 pressure in children and adolescents with obesity. *Int J Obes (Lond)* 2019 doi:  
45 505 10.1038/s41366-019-0384-2  
46 506 29. Nilsson I, Wadeskog A. Utanförskapets Ekonomiska Sociotoper: Socioekonomisk analys på  
47 507 stadsdelsnivå inom ramen för Healthy Cities 2012  
48 508 30. Finn KE, Seymour CM, Phillips AE. Weight bias and grading among middle and high school  
49 509 teachers. *Br J Educ Psychol* 2019 doi: 10.1111/bjep.12322 [published Online First:  
50 510 2019/10/28]  
51 511 31. Nguyen JC, Killcross AS, Jenkins TA. Obesity and cognitive decline: role of inflammation and  
52 512 vascular changes. *Frontiers in neuroscience* 2014;8:375. doi: 10.3389/fnins.2014.00375  
53 513 [published Online First: 2014/12/06]  
54 514 32. Tsai C-L, Chen F-C, Pan C-Y, et al. The neurocognitive performance of visuospatial attention in  
55 515 children with obesity. *Frontiers in psychology* 2016;7

- 1  
2  
3 516 33. Laurent JS, Watts R, Adise S, et al. Associations Among Body Mass Index, Cortical Thickness, and  
4 517 Executive Function in Children. *JAMA Pediatr* 2019 doi: 10.1001/jamapediatrics.2019.4708  
5 518 [published Online First: 2019/12/10]  
6 519 34. Sweat V, Yates KF, Migliaccio R, et al. Obese adolescents show reduced cognitive processing  
7 520 speed compared with healthy weight peers. *Childhood Obesity* 2017  
8 521 35. Cheke LG, Bonnici HM, Clayton NS, et al. Obesity and insulin resistance are associated with  
9 522 reduced activity in core memory regions of the brain. *Neuropsychologia* 2017;96:137-49.  
10 523 36. Bruehl H, Sweat V, Tirsi A, et al. Obese Adolescents with Type 2 Diabetes Mellitus Have  
11 524 Hippocampal and Frontal Lobe Volume Reductions. *Neuroscience and medicine* 2011;2(1):34-  
12 525 42. doi: 10.4236/nm.2011.21005  
13 526 37. Spyridaki EC, Simos P, Avgoustinaki PD, et al. The association between obesity and fluid  
14 527 intelligence impairment is mediated by chronic low-grade inflammation. *British Journal of*  
15 528 *Nutrition* 2014;112(10):1724-34.  
16 529 38. Mangone A, Yates KF, Sweat V, et al. Cognitive functions among predominantly minority urban  
17 530 adolescents with metabolic syndrome. *Applied Neuropsychology: Child* 2017:1-7.  
18 531 39. Alosco ML, Spitznagel MB, Strain G, et al. Improved memory function two years after bariatric  
19 532 surgery. *Obesity* 2014;22(1):32-38.  
20 533 40. Olbers T, Beamish AJ, Gronowitz E, et al. Laparoscopic Roux-en-Y gastric bypass in adolescents  
21 534 with severe obesity (AMOS): a prospective, 5-year, Swedish nationwide study. *Lancet*  
22 535 *Diabetes Endocrinol* 2017;5(3):174-83. doi: 10.1016/S2213-8587(16)30424-7  
23 536 41. Biessels GJ, Reagan LP. Hippocampal insulin resistance and cognitive dysfunction. *Nature Reviews*  
24 537 *Neuroscience* 2015;16(11):660.  
25 538 42. Latner JD, Stunkard AJ. Getting worse: the stigmatization of obese children. *Obesity research*  
26 539 2003;11(3):452-6. doi: 10.1038/oby.2003.61  
27 540 43. Pierce JW, Wardle J. Cause and effect beliefs and self-esteem of overweight children. *Journal of*  
28 541 *child psychology and psychiatry, and allied disciplines* 1997;38(6):645-50. [published Online  
29 542 First: 1997/10/08]  
30 543 44. Lindberg L, Ek A, Nyman J, et al. Low grandparental social support combined with low parental  
31 544 socioeconomic status is closely associated with obesity in preschool-aged children: a pilot  
32 545 study. *Pediatr Obes* 2015 doi: 10.1111/ijpo.12049  
33  
34  
35  
36  
37 546  
38  
39  
40  
41  
42  
43  
44  
45  
46  
47  
48  
49  
50  
51  
52  
53  
54  
55  
56  
57  
58  
59  
60

1  
2  
3  
4 547 **Supporting information**  
5  
6

7 548 **S1 Table. International Classification of Diseases (ICD 10<sup>th</sup> revision) codes and**  
8  
9 549 **Anatomical Therapeutic Chemical (ATC) classification system codes used.**  
10  
11

12 550 **S2 Table. Proportion of children completing  $\geq 12$  years of schooling.**  
13  
14

15 551 **S3 Table. Proportion of individuals who have undergone obesity treatment in childhood**  
16 **who completed  $\geq 12$  years of schooling by calendar year and by age at start of obesity**  
17 **treatment (n=3,942).**  
18  
19  
20  
21  
22

23 554  
24  
25  
26  
27  
28  
29  
30  
31  
32  
33  
34  
35  
36  
37  
38  
39  
40  
41  
42  
43  
44  
45  
46  
47  
48  
49  
50  
51  
52  
53  
54  
55  
56  
57  
58  
59  
60

1  
2  
3  
4  
5  
6  
7  
8  
9  
10  
11  
12  
13  
14  
15  
16  
17  
18  
19  
20  
21  
22  
23  
24  
25  
26  
27  
28  
29  
30  
31  
32  
33  
34  
35  
36  
37  
38  
39  
40  
41  
42  
43  
44  
45  
46  
47  
48  
49  
50  
51  
52  
53  
54  
55  
56  
57  
58  
59  
60

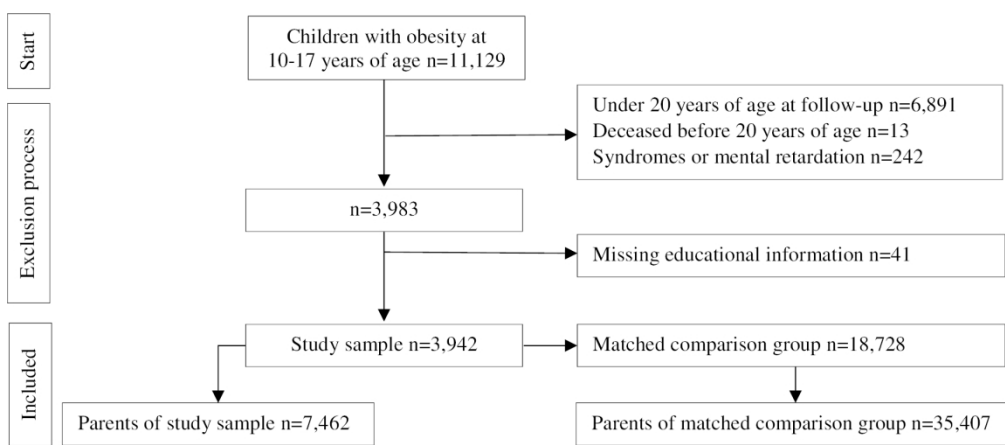

Figure 1

169x73mm (300 x 300 DPI)

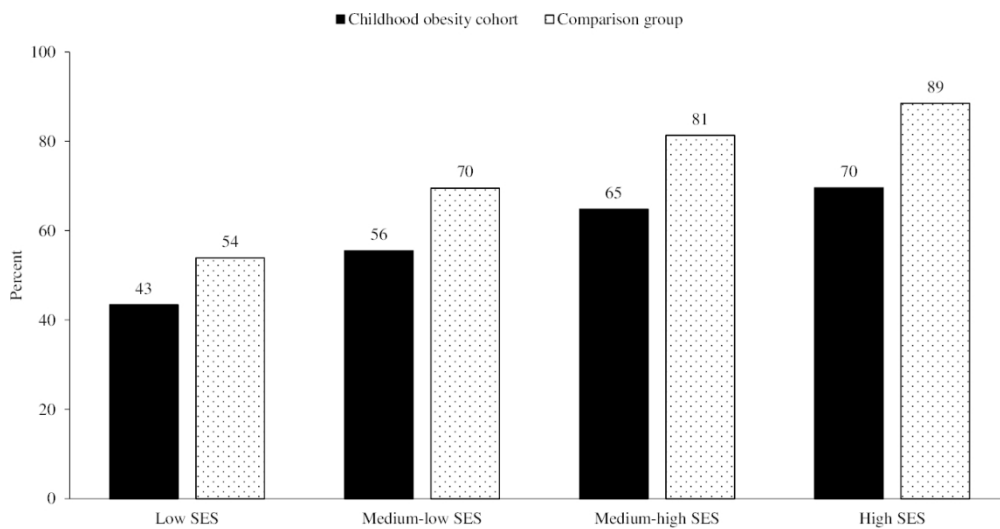

118x60mm (300 x 300 DPI)



1  
2  
3  
4  
5  
6  
7  
8  
9  
10  
11  
12  
13  
14  
15  
16  
17  
18  
19  
20  
21  
22  
23  
24  
25  
26  
27  
28  
29  
30  
31  
32  
33  
34  
35  
36  
37  
38  
39  
40  
41  
42  
43  
44  
45  
46  
47  
48  
49  
50  
51  
52  
53  
54  
55  
56  
57  
58  
59  
60

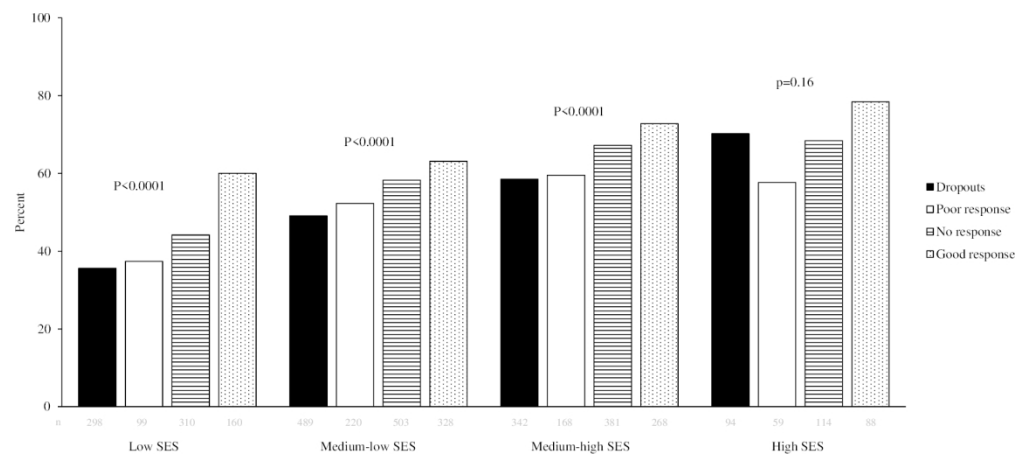

150x66mm (300 x 300 DPI)

**S1 Table. International Classification of Diseases (ICD 10<sup>th</sup> revision) codes and Anatomical Therapeutic Chemical (ATC) classification system codes used.**

| Condition                  | ICD-10                                         | ATC Code |
|----------------------------|------------------------------------------------|----------|
| Anxiety/sedatives          | F40.0-F40.1, F41-F42, F51.4-F51.9, F93.0-F93.2 | N05B     |
| Depression/antidepressants | F32-F39, F92                                   | N06A     |
| ADHD/ADD                   | F90                                            | N06B     |
| Mental retardation         | F70-F79                                        |          |
| Genetic syndromes          |                                                |          |
| Fragile X                  | Q99.2                                          |          |
| Klinefelter                | Q98                                            |          |
| Laurence-Moon-Bardet-Biedl | Q87.8B                                         |          |
| Mb Down                    | Q90                                            |          |
| Noonan                     | Q87.1E                                         |          |
| Prader-Willi               | Q87.1F                                         |          |
| Silver Russell             | Q87.1G                                         |          |
| Turner                     | Q96                                            |          |

**S2 Table. Proportion of children completing  $\geq 12$  years of schooling**

|                              | Childhood obesity cohort |      | Comparison group |      | p-value <sup>¶</sup> |
|------------------------------|--------------------------|------|------------------|------|----------------------|
|                              | n                        | %    | n                | %    |                      |
| Total                        | 2,236                    | 56.7 | 13,939           | 74.4 | <0.0001              |
| Sex                          |                          |      |                  |      |                      |
| Girl                         | 1,090                    | 59.7 | 6,843            | 78.7 | <0.0001              |
| Boy                          | 1,146                    | 54.1 | 7,096            | 70.8 | <0.0001              |
| Migration background         |                          |      |                  |      |                      |
| Nordic                       | 1,695                    | 58.4 | 10,974           | 78.1 | <0.0001              |
| Non-Nordic                   | 541                      | 52.2 | 2,965            | 63.4 | <0.0001              |
| ADHD/ADD                     |                          |      |                  |      |                      |
| Non-ADHD/ADD                 | 2,032                    | 61.1 | 13,528           | 76.5 | <0.0001              |
| ADHD/ADD                     | 204                      | 33.1 | 411              | 39.4 | 0.01                 |
| Anxiety/depression           |                          |      |                  |      |                      |
| No anxiety/depression        | 1,902                    | 61.1 | 12,754           | 77.0 | <0.0001              |
| Anxiety/depression           | 334                      | 40.2 | 1,185            | 54.9 | <0.0001              |
| Parental SES                 |                          |      |                  |      |                      |
| Low                          | 376                      | 43.4 | 1,455            | 53.9 | <0.0001              |
| Medium-low                   | 855                      | 55.5 | 4,187            | 69.5 | <0.0001              |
| Medium-high                  | 751                      | 64.8 | 5,358            | 81.3 | <0.0001              |
| High                         | 247                      | 69.6 | 2,848            | 88.5 | <0.0001              |
| Maternal education           |                          |      |                  |      |                      |
| Compulsory school            | 755                      | 47.7 | 3,474            | 61.9 | <0.0001              |
| Upper secondary school       | 945                      | 61.3 | 5,582            | 77.9 | <0.0001              |
| University degree            | 506                      | 69.3 | 4,589            | 85.3 | <0.0001              |
| Paternal education           |                          |      |                  |      |                      |
| Compulsory school            | 639                      | 50.2 | 2,775            | 63.0 | <0.0001              |
| Upper secondary school       | 1,132                    | 59.9 | 7,085            | 77.9 | <0.0001              |
| University degree            | 318                      | 66.0 | 3,333            | 85.2 | <0.0001              |
| Maternal income              |                          |      |                  |      |                      |
| Q1                           | 614                      | 52.3 | 3,327            | 68.1 | <0.0001              |
| Q2                           | 750                      | 58.6 | 4,391            | 75.2 | <0.0001              |
| Q3                           | 542                      | 58.2 | 3,534            | 77.1 | <0.0001              |
| Q4                           | 304                      | 62.6 | 2,429            | 81.3 | <0.0001              |
| Paternal income              |                          |      |                  |      |                      |
| Q1                           | 556                      | 49.3 | 2,453            | 62.6 | <0.0001              |
| Q2                           | 410                      | 54.0 | 2,260            | 72.3 | <0.0001              |
| Q3                           | 549                      | 61.8 | 3,404            | 77.6 | <0.0001              |
| Q4                           | 572                      | 66.2 | 5,056            | 84.5 | <0.0001              |
| Maternal occupational status |                          |      |                  |      |                      |
| No occupation                | 438                      | 47.8 | 1,722            | 58.3 | <0.0001              |
| Occupation                   | 1,777                    | 60.0 | 12,005           | 77.9 | <0.0001              |
| Paternal occupational status |                          |      |                  |      |                      |
| No occupation                | 363                      | 45.4 | 1,543            | 58.7 | <0.0001              |
| Occupation                   | 1,736                    | 60.5 | 11,703           | 78.5 | <0.0001              |

Abbreviations: SES, socioeconomic status; Q, quartile. <sup>¶</sup>Performed with chi-square.

1 EUR  $\approx$  9.83 SEK December 31<sup>st</sup> 2017. Q1: <18,652 EUR; Q2: 18,652 to 25,025 EUR; Q3: 25,026 to 32,309 EUR; Q4: >32,309 EUR.

**S3 Table. Proportion of individuals who have undergone obesity treatment in childhood who completed  $\geq 12$  years of schooling by calendar year and by age at start of obesity treatment (n=3,942).**

| <b>Individuals completing <math>\geq 12</math> years of schooling</b> |          |          |
|-----------------------------------------------------------------------|----------|----------|
|                                                                       | <u>n</u> | <u>%</u> |
| Calendar year at start of obesity treatment                           |          |          |
| 1995-2001                                                             | 229      | 62.6     |
| 2002-2008                                                             | 1,262    | 58.1     |
| 2009-2014                                                             | 745      | 53.1     |
| Age at start of obesity treatment                                     |          |          |
| 10 - 12.99                                                            | 960      | 59.0     |
| 13 - 16.99                                                            | 1,276    | 55.1     |

STROBE Statement—Checklist of items that should be included in reports of *cohort studies*

|                              | Item No | Recommendation                                                                                                                                                                                                                                                                                                         | Page No     |
|------------------------------|---------|------------------------------------------------------------------------------------------------------------------------------------------------------------------------------------------------------------------------------------------------------------------------------------------------------------------------|-------------|
| <b>Title and abstract</b>    | 1       | (a) Indicate the study's design with a commonly used term in the title or the abstract<br>(b) Provide in the abstract an informative and balanced summary of what was done and what was found                                                                                                                          | 1-2<br>2-3  |
| <b>Introduction</b>          |         |                                                                                                                                                                                                                                                                                                                        |             |
| Background/rationale         | 2       | Explain the scientific background and rationale for the investigation being reported                                                                                                                                                                                                                                   | 4           |
| Objectives                   | 3       | State specific objectives, including any prespecified hypotheses                                                                                                                                                                                                                                                       | 4.5         |
| <b>Methods</b>               |         |                                                                                                                                                                                                                                                                                                                        |             |
| Study design                 | 4       | Present key elements of study design early in the paper                                                                                                                                                                                                                                                                | 5           |
| Setting                      | 5       | Describe the setting, locations, and relevant dates, including periods of recruitment, exposure, follow-up, and data collection                                                                                                                                                                                        | 5-9         |
| Participants                 | 6       | (a) Give the eligibility criteria, and the sources and methods of selection of participants. Describe methods of follow-up<br>(b) For matched studies, give matching criteria and number of exposed and unexposed                                                                                                      | 5<br>5      |
| Variables                    | 7       | Clearly define all outcomes, exposures, predictors, potential confounders, and effect modifiers. Give diagnostic criteria, if applicable                                                                                                                                                                               | 7-9         |
| Data sources/<br>measurement | 8*      | For each variable of interest, give sources of data and details of methods of assessment (measurement). Describe comparability of assessment methods if there is more than one group                                                                                                                                   | 7-9         |
| Bias                         | 9       | Describe any efforts to address potential sources of bias                                                                                                                                                                                                                                                              | 7-9         |
| Study size                   | 10      | Explain how the study size was arrived at                                                                                                                                                                                                                                                                              | 5           |
| Quantitative variables       | 11      | Explain how quantitative variables were handled in the analyses. If applicable, describe which groupings were chosen and why                                                                                                                                                                                           | 9-10        |
| Statistical methods          | 12      | (a) Describe all statistical methods, including those used to control for confounding<br>(b) Describe any methods used to examine subgroups and interactions<br>(c) Explain how missing data were addressed<br>(d) If applicable, explain how loss to follow-up was addressed<br>(e) Describe any sensitivity analyses | 9-10        |
| <b>Results</b>               |         |                                                                                                                                                                                                                                                                                                                        |             |
| Participants                 | 13*     | (a) Report numbers of individuals at each stage of study—eg numbers potentially eligible, examined for eligibility, confirmed eligible, included in the study, completing follow-up, and analysed<br>(b) Give reasons for non-participation at each stage<br>(c) Consider use of a flow diagram                        | 12 +<br>fig |
| Descriptive data             | 14*     | (a) Give characteristics of study participants (eg demographic, clinical, social) and information on exposures and potential confounders<br>(b) Indicate number of participants with missing data for each variable of interest<br>(c) Summarise follow-up time (eg, average and total amount)                         | 11          |
| Outcome data                 | 15*     | Report numbers of outcome events or summary measures over time                                                                                                                                                                                                                                                         | 12          |

|    |                          |    |                                                                                                                                                                                                              |       |
|----|--------------------------|----|--------------------------------------------------------------------------------------------------------------------------------------------------------------------------------------------------------------|-------|
| 1  | Main results             | 16 | (a) Give unadjusted estimates and, if applicable, confounder-adjusted estimates and their precision (eg, 95% confidence interval). Make clear which confounders were adjusted for and why they were included | 12-17 |
| 2  |                          |    | (b) Report category boundaries when continuous variables were categorized                                                                                                                                    |       |
| 3  |                          |    | (c) If relevant, consider translating estimates of relative risk into absolute risk for a meaningful time period                                                                                             |       |
| 4  |                          |    |                                                                                                                                                                                                              |       |
| 5  |                          |    |                                                                                                                                                                                                              |       |
| 6  |                          |    |                                                                                                                                                                                                              |       |
| 7  |                          |    |                                                                                                                                                                                                              |       |
| 8  |                          |    |                                                                                                                                                                                                              |       |
| 9  | Other analyses           | 17 | Report other analyses done—eg analyses of subgroups and interactions, and sensitivity analyses                                                                                                               | 12-17 |
| 10 |                          |    |                                                                                                                                                                                                              |       |
| 11 | <b>Discussion</b>        |    |                                                                                                                                                                                                              |       |
| 12 |                          |    |                                                                                                                                                                                                              |       |
| 13 | Key results              | 18 | Summarise key results with reference to study objectives                                                                                                                                                     | 18    |
| 14 | Limitations              | 19 | Discuss limitations of the study, taking into account sources of potential bias or imprecision. Discuss both direction and magnitude of any potential bias                                                   | 20-21 |
| 15 |                          |    |                                                                                                                                                                                                              |       |
| 16 | Interpretation           | 20 | Give a cautious overall interpretation of results considering objectives, limitations, multiplicity of analyses, results from similar studies, and other relevant evidence                                   | 18-21 |
| 17 |                          |    |                                                                                                                                                                                                              |       |
| 18 |                          |    |                                                                                                                                                                                                              |       |
| 19 | Generalisability         | 21 | Discuss the generalisability (external validity) of the study results                                                                                                                                        | 21    |
| 20 |                          |    |                                                                                                                                                                                                              |       |
| 21 | <b>Other information</b> |    |                                                                                                                                                                                                              |       |
| 22 | Funding                  | 22 | Give the source of funding and the role of the funders for the present study and, if applicable, for the original study on which the present article is based                                                | 22-23 |
| 23 |                          |    |                                                                                                                                                                                                              |       |
| 24 |                          |    |                                                                                                                                                                                                              |       |

\*Give information separately for exposed and unexposed groups.

**Note:** An Explanation and Elaboration article discusses each checklist item and gives methodological background and published examples of transparent reporting. The STROBE checklist is best used in conjunction with this article (freely available on the Web sites of PLoS Medicine at <http://www.plosmedicine.org/>, Annals of Internal Medicine at <http://www.annals.org/>, and Epidemiology at <http://www.epidem.com/>). Information on the STROBE Initiative is available at <http://www.strobe-statement.org>.

# BMJ Open

## Obesity in childhood, socioeconomic status, and completion of 12 or more school years: a prospective cohort study

|                                 |                                                                                                                                                                                                                                                                                                                                                                                                                                                                                                               |
|---------------------------------|---------------------------------------------------------------------------------------------------------------------------------------------------------------------------------------------------------------------------------------------------------------------------------------------------------------------------------------------------------------------------------------------------------------------------------------------------------------------------------------------------------------|
| Journal:                        | <i>BMJ Open</i>                                                                                                                                                                                                                                                                                                                                                                                                                                                                                               |
| Manuscript ID                   | bmjopen-2020-040432.R1                                                                                                                                                                                                                                                                                                                                                                                                                                                                                        |
| Article Type:                   | Original research                                                                                                                                                                                                                                                                                                                                                                                                                                                                                             |
| Date Submitted by the Author:   | 03-Nov-2020                                                                                                                                                                                                                                                                                                                                                                                                                                                                                                   |
| Complete List of Authors:       | Lindberg, Louise; Karolinska Institutet, Dept. Clinical Science, Intervention and Technology<br>Persson, Martina; Karolinska Institute, Department of Medicine, Clinical Epidemiology, Karolinska Institutet;<br>Danielsson, Pernilla; Karolinska Institutet, Dept. Clinical Science, Intervention and Technology<br>Hagman, Emilia; Karolinska Institutet, Dept. Clinical Science, Intervention and Technology<br>Marcus, Claude; Karolinska Institutet, Dept. Clinical Science, Intervention and Technology |
| <b>Primary Subject Heading</b>: | Paediatrics                                                                                                                                                                                                                                                                                                                                                                                                                                                                                                   |
| Secondary Subject Heading:      | Epidemiology, Nutrition and metabolism, Public health                                                                                                                                                                                                                                                                                                                                                                                                                                                         |
| Keywords:                       | Paediatric endocrinology < DIABETES & ENDOCRINOLOGY, EPIDEMIOLOGY, Paediatric endocrinology < PAEDIATRICS, PUBLIC HEALTH                                                                                                                                                                                                                                                                                                                                                                                      |
|                                 |                                                                                                                                                                                                                                                                                                                                                                                                                                                                                                               |

SCHOLARONE™  
Manuscripts



I, the Submitting Author has the right to grant and does grant on behalf of all authors of the Work (as defined in the below author licence), an exclusive licence and/or a non-exclusive licence for contributions from authors who are: i) UK Crown employees; ii) where BMJ has agreed a CC-BY licence shall apply, and/or iii) in accordance with the terms applicable for US Federal Government officers or employees acting as part of their official duties; on a worldwide, perpetual, irrevocable, royalty-free basis to BMJ Publishing Group Ltd ("BMJ") its licensees and where the relevant Journal is co-owned by BMJ to the co-owners of the Journal, to publish the Work in this journal and any other BMJ products and to exploit all rights, as set out in our [licence](#).

The Submitting Author accepts and understands that any supply made under these terms is made by BMJ to the Submitting Author unless you are acting as an employee on behalf of your employer or a postgraduate student of an affiliated institution which is paying any applicable article publishing charge ("APC") for Open Access articles. Where the Submitting Author wishes to make the Work available on an Open Access basis (and intends to pay the relevant APC), the terms of reuse of such Open Access shall be governed by a Creative Commons licence – details of these licences and which [Creative Commons](#) licence will apply to this Work are set out in our licence referred to above.

Other than as permitted in any relevant BMJ Author's Self Archiving Policies, I confirm this Work has not been accepted for publication elsewhere, is not being considered for publication elsewhere and does not duplicate material already published. I confirm all authors consent to publication of this Work and authorise the granting of this licence.



1  
2  
3  
4 1 Obesity in childhood, socioeconomic status, and completion of 12 or  
5  
6  
7 2 more school years: a prospective cohort study  
8  
9  
10 3

11 4 Louise Lindberg<sup>1</sup>, Martina Persson<sup>2,3,4</sup>, Pernilla Danielsson<sup>1</sup>, Emilia Hagman<sup>1\*</sup>, Claude  
12  
13  
14 5 Marcus<sup>1</sup>  
15  
16  
17 6

18  
19  
20 7 <sup>1</sup>Department of Clinical Science, Intervention and Technology, Division of Pediatrics,  
21 8 Karolinska Institutet, Stockholm, Sweden  
22

23 9 <sup>2</sup>Department of Medicine Solna, Clinical Epidemiology Unit, Karolinska Institutet,  
24 10 Stockholm, Sweden  
25

26 11 <sup>3</sup>Department of Diabetes and Endocrinology, Sachska Children's Hospital Södersjukhuset,  
27 12 Stockholm, Sweden  
28

29  
30 13 <sup>4</sup>Department of Clinical Science and Education, Södersjukhuset, Karolinska Institutet,  
31 14 Stockholm, Sweden  
32

33 15 \*Corresponding author e-mail: [emilia.hagman@ki.se](mailto:emilia.hagman@ki.se) (EH)  
34

35 16 Other contributing authors e-mail: [louise.lindberg@ki.se](mailto:louise.lindberg@ki.se); [martina.persson@ki.se](mailto:martina.persson@ki.se);  
36 17 [pernilla.danielsson.liljeqvist@ki.se](mailto:pernilla.danielsson.liljeqvist@ki.se); [claudio.marcus@ki.se](mailto:claudio.marcus@ki.se)  
37

38 18 Keywords: Pediatric obesity, schools, epidemiology, social class, cohort study  
39

40 19 Word count: 3722  
41  
42  
43  
44  
45  
46  
47  
48  
49  
50  
51  
52  
53  
54  
55  
56  
57  
58  
59  
60

## 20 Abstract

21 **Objectives:** Children with obesity achieve lower educational level compared with normal-  
22 weight peers. Parental socioeconomic status (SES) impacts both a child's academic  
23 achievement and risk of obesity. The degree to which the association between obesity and  
24 education depend on parental SES is unclear. Therefore, the primary aim is to investigate if  
25 individuals with obesity in childhood are less likely to complete  $\geq 12$  years of schooling,  
26 independently of parental SES. The secondary aim is to study how weight loss, level of  
27 education, and parental SES are associated.

28 **Design:** Nationwide prospective cohort study.

29 **Setting:** Swedish national register data.

30 **Participants:** Children aged 10-17 years, recorded in the Swedish Childhood Obesity  
31 Treatment Register (BORIS), and aged 20 years or older at follow-up were included  
32 (n=3,942). A comparison group was matched by sex, year of birth, and living area  
33 (n=18,728). Parental SES was based on maternal and paternal level of education, income,  
34 and occupational status.

35 **Primary outcome measure:** Completion of  $\geq 12$  years of schooling was analysed with  
36 conditional logistic regression, and adjusted for group, migration background, ADHD/ADD,  
37 anxiety/depression, and parental SES.

38 **Results:** Among those with obesity in childhood, 56.7% completed  $\geq 12$  school years  
39 compared with 74.4% in the comparison group ( $p < 0.0001$ ). High parental SES compared  
40 with low SES was strongly associated with attained level of education in both children with  
41 and without obesity, adjusted odds ratio (<sup>a</sup>OR) [99% confidence interval (CI)]=5.40 [4.45 to  
42 6.55]. However, obesity in childhood remains a strong risk factor of not completing  $\geq 12$

1  
2  
3 43 school years, independently of parental SES, <sup>a</sup>OR=0.57 [0.51 to 0.63]. Successful obesity  
4  
5 44 treatment increased the odds of completing  $\geq 12$  years in school even when taking parental  
6  
7  
8 45 SES into account, <sup>a</sup>OR=1.34 [1.04 to 1.72].  
9

10 46 **Conclusions:** Individuals with obesity in childhood have lower odds of completing  $\geq 12$   
11  
12 47 school years, independently of parental SES. Optimized obesity treatment may improve  
13  
14  
15 48 school results in this group.  
16

## 17 49

### 20 50 **Strengths and limitation of this study**

- 23 51 • In this prospective cohort study, we have been able to investigate the level of  
24  
25 52 education among a large number of individuals who have obesity in childhood (n=  
26  
27 53 3,942) in comparison with a matched group (n=18,728).  
28  
29
- 30 54 • The study design of using longitudinal data from several national registers provided  
31  
32 55 the opportunity to control for important confounding factors, such as neuropsychiatric  
33  
34 56 disorders, anxiety, depression, and family socioeconomic status.  
35  
36
- 37 57 • Factors such as free education, school lunches, and students' health care may have an  
38  
39 58 impact on the generalizability of our data to other populations.  
40  
41

42 59  
43  
44  
45  
46  
47  
48  
49  
50  
51  
52  
53  
54  
55  
56  
57  
58  
59  
60

## 60 Introduction

61 During the last 40 years, the prevalence of childhood obesity has increased exponentially in  
62 many parts of the world.<sup>1</sup> Childhood obesity is associated with increased risks of somatic  
63 morbidity and risk of premature death in adulthood.<sup>2-5</sup> Psychosocial maladjustment, anxiety  
64 and depression are also prevalent<sup>6 7</sup> and may contribute to the obesity-related long-term  
65 morbidity and mortality.<sup>5</sup> Most studies report that children with obesity more often have  
66 lower school grades and reach a lower level of education compared with normal-weight  
67 peers,<sup>8-10</sup> but in a recent study, only girls with obesity were affected.<sup>11</sup> We have previously  
68 confirmed the association between obesity and lower attained level of education among both  
69 girls and boys.<sup>9</sup> We also found that successful obesity treatment was positively correlated  
70 with completing  $\geq 12$  school years, although without taking socioeconomic status (SES) into  
71 account.<sup>9</sup>

72 Low parental SES is a well-established risk factor for both childhood obesity and poorer  
73 academic achievement.<sup>12</sup> In particular, parental education has been demonstrated to influence  
74 the child's performance at school.<sup>13-15</sup> In addition, depression<sup>16</sup> and neuropsychiatric  
75 disorders, including Attention Deficit Disorder with or without Hyperactivity  
76 (ADHD/ADD),<sup>17</sup> may adversely affect school results. Depression and neuropsychiatric  
77 disorders are more common in children with obesity compared to the general population.<sup>9 18</sup>  
78 Investigating the impact of obesity alone on attained level of education requires that these  
79 and other confounders are considered. The primary aim of this study was to disentangle the  
80 association of childhood obesity and parental SES on completed level of education. The

1  
2  
3 81 secondary aim was to study if positive effects of weight loss on attained level of education is  
4  
5 82 affected by parental SES.  
6  
7

## 8 83 **Methods**

### 9 84 **Study population**

10  
11  
12  
13  
14  
15  
16 85 This prospective cohort study included children with obesity,<sup>19</sup> aged 10-17 years at the start  
17  
18 86 of obesity treatment (December 1994 to December 2015), and aged 20 years or older and  
19  
20  
21 87 living in Sweden at follow-up (December 31<sup>st</sup> 2017; n=3,942). Data on subjects receiving  
22  
23 88 treatment for childhood obesity was collected from the Swedish Childhood Obesity  
24  
25 89 Treatment Register (BORIS). BORIS has been thoroughly described elsewhere,<sup>20</sup> but in  
26  
27  
28 90 short: The main purpose of the register is quality assessment and long-term evaluation of  
29  
30 91 childhood obesity treatment. Treatment is individualized and consists primarily of lifestyle  
31  
32 92 modification (i.e. diet and physical activity).  
33  
34

35 93 A comparison group from the general population was randomly identified using the Swedish  
36  
37 94 Total Population Register and matched by sex, year of birth, and living area at the year  
38  
39 95 obesity treatment was initiated (n=18,728). Using density matching without replacement,  
40  
41 96 five individuals were matched to each individual from the childhood obesity cohort. Siblings  
42  
43 97 of children registered in the childhood obesity cohort were excluded from the comparison  
44  
45 98 group. Children with a diagnosis of mental retardation or genetic syndromes were excluded  
46  
47  
48 99 from both the childhood obesity cohort and the comparison group (Fig 1 and S1 Table).  
49  
50

51  
52 100

1  
2  
3 101 Families were informed in written or verbal about data collection in the Swedish Childhood  
4  
5 102 Obesity Treatment Register. Post an opt-out approval by parents/guardians, data of the  
6  
7 103 children's weight and height were recorded by the local health care provider during treatment  
8  
9 104 visits. There was no data of weight and height of individuals in the comparison group.  
10  
11 105 However, less than 1% of the individuals in the comparison group were found in the National  
12  
13 106 Patient Register with a diagnosis of obesity in childhood. In Sweden, health care is free of  
14  
15 107 charge for children and adolescents until 18 years of age. The study was approved by the  
16  
17 108 regional Ethics Committee in Stockholm, Sweden (No. 2016/922-31/1).

## 109 **Data sources**

110 Using the Swedish identity number, which is unique to each resident in Sweden, data from  
111 several national registers were linked.<sup>21</sup> Data on education, income, and occupational status  
112 were obtained from the Longitudinal Integration Database for Health Insurance and Labour  
113 Market Studies. Information on migration background for children and their parents was  
114 obtained from the Swedish Total Population Register.<sup>22</sup> Both these registers are held by  
115 Statistics Sweden, a governmental agency that collects and provide official statistics  
116 ([www.scb.se/en](http://www.scb.se/en)).

117 Data on diagnoses of mental retardation, genetic syndromes, ADHD/ADD, anxiety, and  
118 depression were identified based on codes according the International Classification of  
119 Diseases (10<sup>th</sup> revision; S1 Table) and retrieved from the National Patient Register.<sup>23</sup>  
120 Information on prescriptions of psychostimulant drugs for ADHD/ADD as well as  
121 antidepressants and tranquilizers for anxiety and depression were identified using the  
122 Anatomical Therapeutic Chemical classification system (S1 Table) retrieved from the

1  
2  
3 123 Swedish Prescribed Drug Register.<sup>24</sup> Data on deaths were retrieved from the Cause of Death  
4  
5 124 Register.<sup>25</sup> These registers are held and were linked by the governmental agency the National  
6  
7  
8 125 Board of Health and Welfare ([www.socialstyrelsen.se/english](http://www.socialstyrelsen.se/english)).

## 11 126 **Definition of outcome**

13  
14 127 The main outcome was defined as completion of  $\geq 12$  years of schooling, and based on the  
15  
16 128 International Standard Classification of Education.<sup>26</sup> In Sweden, children start school at the  
17  
18 129 age of 6 or 7 years and attend compulsory school for 9 years. Upper secondary school  
19  
20 130 includes three additional years of schooling and provides the requirements to attend higher  
21  
22 131 education. Usually students graduate from upper secondary school at 18 or 19 years of age.  
23  
24 132 All education in Sweden is free of charge. Students in compulsory and upper secondary  
25  
26 133 school are provided school lunches and health care at schools, also free of charge.

## 31 134 **Definition of exposure variables**

32  
33  
34  
35 135 Degree of obesity in children from BORIS was assessed with Body Mass Index Standard  
36  
37 136 Deviation Score (BMI SDS), which is standardized by sex and age and used to measure  
38  
39 137 degree of obesity in growing children.<sup>19</sup> Baseline measures (continuous) were used for the  
40  
41 138 variable BMI SDS at start of treatment. Response to obesity treatment was based on the  
42  
43 139 change of BMI SDS from the first to the last clinical visit and categorized into four groups:<sup>3</sup>  
44  
45 140 <sup>27</sup> good response, a reduction of BMI SDS by 0.25 units or more; no response, a change of  
46  
47 141 BMI SDS by +/- 0.24 units; poor response, an increase of BMI SDS by 0.25 units or more;  
48  
49 142 and dropouts, children with less than one year between their first and last measure or without  
50  
51 143 clinical follow-up after their first registered visit.  
52  
53  
54  
55  
56  
57  
58  
59  
60

1  
2  
3 144 Parental SES was based on maternal and paternal level of education, income, and  
4  
5 145 occupational status at the year the child turned 15 years, which is about the same time as the  
6  
7 146 child starts upper secondary school. In case of the child was adopted, the SES of adoptive  
8  
9  
10 147 parents was used (childhood obesity cohort n=24 and comparison group n=164). The  
11  
12 148 rationale of treating SES as a composite variable was to capture more of the social context  
13  
14 149 and a potential inequality embedded there. Thus, by taking three variables into account  
15  
16 150 instead of one, we get a more wide and robust measure of SES. Maternal and paternal  
17  
18 151 educational level was categorized into compulsory school, upper secondary school, or  
19  
20 152 university degree. Annual disposable income was used to reflect maternal and paternal  
21  
22 153 economic capacity. The annual disposable income includes all taxable (direct labour income,  
23  
24 154 capital gains from shares etc.) and tax-free income (housing and child benefits, student aid  
25  
26 155 etc.), minus final tax and other negative transfers such as capital loss from shares and  
27  
28 156 properties. Disposable income from different years was converted to 2017 prices using the  
29  
30 157 Consumer Price Index for Sweden provided by Statistics Sweden ([www.scb.se/en](http://www.scb.se/en)). Income  
31  
32 158 was categorized into quartiles based on data from the parents in the comparison group. No  
33  
34 159 occupation was defined as either unemployment 6 months or more, or income from long-  
35  
36 160 term sick leave exceeding any income from the individual's gross salary. Individuals  
37  
38 161 considered to have an occupation included those registered as employed or having an income  
39  
40 162 from student grants/loan equivalent to full-time studies for at least one semester. Parental  
41  
42 163 SES was weighted according to maternal and paternal education (0, 1, 2), income (0, 1, 2, 3),  
43  
44 164 and occupational status (0, 1). The mean parental SES score (i.e. the sum of the mother's and  
45  
46 165 father's all SES indicators divided by two) was applied to their child. The SES-variable was  
47  
48  
49  
50  
51  
52  
53  
54  
55  
56  
57  
58  
59  
60



1  
2  
3 166 categorized into four levels; low SES (0 to 1.5 points), medium-low SES (2 to 3 points),  
4  
5 167 medium-high SES (3.5 to 4.5 points), and high SES (5 to 6 points).  
6  
7

8 168 The prevalence of both ADHD/ADD<sup>9</sup> and depression<sup>18</sup> is higher in children with obesity and  
9  
10 169 may negatively influence attained level of education.<sup>9 16 17</sup> ADHD/ADD and  
11  
12 170 anxiety/depression in children were identified based on diagnosis or dispensed prescribed  
13  
14 171 medication (S1 Table).  
15  
16  
17

## 18 172 **Definition of covariates**

19  
20  
21  
22 173 The migration background of children in Sweden may impact school achievements and is  
23  
24 174 therefore an important factor to control for in the analyses.<sup>9 14</sup> Migration background was  
25  
26 175 categorized as Nordic or non-Nordic. Nordic was defined as born in a Nordic country  
27  
28 176 (Sweden, Norway, Denmark, Finland, or Iceland) with one or two parents born in the Nordic.  
29  
30 177 Children were classified as non-Nordic if born outside the Nordic or born in the Nordic with  
31  
32 178 two parents born outside the Nordic. Other covariates included sex and age (continuous) at  
33  
34 179 start of obesity treatment.  
35  
36  
37  
38

## 39 180 **Patient and public involvement**

40  
41  
42 181 No patient involved.  
43  
44  
45  
46 182

## 49 183 **Statistical analysis**

50  
51  
52  
53 184 Descriptive statistics are presented as means and confidence intervals (CI), medians and  
54  
55 185 interquartile ranges (IQR), or frequencies and percentages. Conditional logistic regression  
56  
57

1  
2  
3 186 was used to calculate odds ratios (OR's) with 99% CI for the main outcome, i.e. completing  
4  
5 187  $\geq 12$  school years. Conditional logistic regression was used above ordinary logistic regression  
6  
7 188 as the childhood obesity cohort and the comparison group were matched by several variables.  
8  
9  
10 189 Independent variables included in the adjusted analyses were migration background,  
11  
12 190 ADHD/ADD, anxiety/depression, parental SES, and group (childhood obesity cohort or  
13  
14 191 comparison group) in analyses including both groups, otherwise stratified by group.  
15  
16  
17 192 Interaction between childhood obesity and parental SES was tested. The association of each  
18  
19 193 SES indicator on the odds of completing  $\geq 12$  school years was also analysed separately for  
20  
21 194 mothers and fathers. Sensitivity analyses excluding individuals with a non-Swedish  
22  
23 195 background (defined as child born in Sweden with at least one parent also born in Sweden),  
24  
25  
26 196 or ADHD/ADD, or anxiety/depression were performed.  
27  
28

29 197 Secondary analyses were performed within the childhood obesity cohort to examine  
30  
31 198 associations between patient characteristics and completed educational level. In ordinary  
32  
33 199 logistic regressions, odds were adjusted for sex, migration background, parental SES, age  
34  
35 200 and BMI SDS at start of treatment, treatment response, ADHD/ADD, and  
36  
37 201 anxiety/depression. We tested for possible interaction between parental SES and treatment  
38  
39 202 response for the odds of completing  $\geq 12$  years of schooling.  
40  
41  
42

43 203 As missing data on parental SES was rare in both groups (Table 1), records with missing data  
44  
45 204 were excluded from the analyses, i.e. data were not imputed. P-values  $< 0.01$  were considered  
46  
47 205 statistically significant. All analyses were performed using SAS statistical software (version  
48  
49 206 9.4, Cary, NC, USA).  
50  
51

52  
53 207  
54  
55  
56  
57  
58  
59  
60

208

**Table 1. Characteristics of the participants (n=22,670)**

|                                 | Childhood obesity cohort<br>(n=3,942) |            | Comparison group<br>(n=18,728) |            |
|---------------------------------|---------------------------------------|------------|--------------------------------|------------|
|                                 | n                                     | %          | n                              | %          |
| Female sex                      | 1,825                                 | 46.3       | 8,701                          | 46.5       |
| Nordic                          | 2,905                                 | 73.7       | 14,048                         | 75.0       |
| Age at end of follow-up (years) | 23.4*                                 | 21.4-26.3* | 23.4*                          | 21.5-26.3* |
| ADHD/ADD                        | 617                                   | 15.7       | 1,044                          | 5.6        |
| Anxiety/Depression              | 831                                   | 21.1       | 2,158                          | 11.5       |
| Parental SES                    |                                       |            |                                |            |
| Low                             | 867                                   | 22.0       | 2,700                          | 14.4       |
| Medium-low                      | 1,540                                 | 39.1       | 6,023                          | 32.1       |
| Medium-high                     | 1,159                                 | 29.4       | 6,587                          | 35.2       |
| High                            | 355                                   | 9.0        | 3,218                          | 17.2       |
| Missing                         | 21                                    | 0.5        | 200                            | 1.1        |
| Maternal education              |                                       |            |                                |            |
| Compulsory school               | 1,582                                 | 40.1       | 5,615                          | 30.0       |
| Upper secondary school          | 1,541                                 | 39.1       | 7,167                          | 38.3       |
| University degree               | 730                                   | 18.5       | 5,383                          | 28.7       |
| Missing                         | 89                                    | 2.3        | 563                            | 3.0        |
| Paternal education              |                                       |            |                                |            |
| Compulsory school               | 1,273                                 | 32.3       | 4,402                          | 23.5       |
| Upper secondary school          | 1,890                                 | 48.0       | 9,095                          | 48.6       |
| University degree               | 482                                   | 12.2       | 3,912                          | 20.9       |
| Missing                         | 297                                   | 7.5        | 1,319                          | 7.0        |
| Maternal income                 |                                       |            |                                |            |
| Q1                              | 1,173                                 | 29.8       | 4,887                          | 26.1       |
| Q2                              | 1,281                                 | 32.5       | 5,843                          | 31.2       |
| Q3                              | 931                                   | 23.6       | 4,585                          | 24.5       |
| Q4                              | 486                                   | 12.3       | 2,988                          | 15.9       |
| Missing                         | 71                                    | 1.8        | 425                            | 2.3        |
| Paternal income                 |                                       |            |                                |            |
| Q1                              | 1,127                                 | 28.6       | 3,917                          | 20.9       |
| Q2                              | 760                                   | 19.3       | 3,128                          | 16.7       |
| Q3                              | 889                                   | 22.5       | 4,389                          | 23.4       |
| Q4                              | 864                                   | 21.9       | 5,986                          | 32.0       |
| Missing                         | 302                                   | 7.7        | 1,308                          | 7.0        |
| Maternal occupational status    |                                       |            |                                |            |
| Occupation                      | 2,963                                 | 75.2       | 15,405                         | 82.2       |
| No occupation                   | 916                                   | 23.2       | 2,956                          | 15.8       |
| Missing                         | 63                                    | 1.6        | 367                            | 2.0        |
| Paternal occupational status    |                                       |            |                                |            |
| Occupation                      | 2,868                                 | 72.8       | 14,906                         | 79.6       |
| No occupation                   | 800                                   | 20.3       | 2,627                          | 14.0       |
| Missing                         | 274                                   | 6.9        | 1,195                          | 6.4        |

Data are n % if not else stated. Abbreviation: SES, socioeconomic status; Q, quartile.

\*Median with interquartile ranges

209

210

## 211 **Results**

212 In total, 3,942 individuals in the childhood obesity cohort and 18,728 individuals in the  
213 comparison group were included in the study (Table 1). In both groups, 46% of the  
214 participants were girls and the median age at follow-up was 23.4 years. The proportions of  
215 individuals of Nordic origin were similar in both groups (73.7% vs. 75.0%;  $p=0.02$ ). Despite  
216 the groups being matched for living area, a greater proportion of children with obesity grew  
217 up in households with low SES compared with the comparison group (22.0% vs. 14.4%;  
218  $p<0.0001$ ).

### 219 **Parental SES, childhood obesity and the child's attained level of** 220 **education**

221 In the childhood obesity cohort, 56.7% completed  $\geq 12$  years in school, compared with 74.4%  
222 in the comparison group. Girls more frequently completed  $\geq 12$  years of schooling than boys  
223 in both groups (S2 Table).

224 Higher parental SES was positively associated with completion of  $\geq 12$  years of schooling in  
225 both the childhood obesity cohort and in the comparison group (Fig 2). The odds were more  
226 than five times higher among children growing up in high SES households compared with  
227 those growing up in low SES households (Table 2). However, even when taking parental  
228 SES and other risk factors into account, individuals in the childhood obesity cohort were  
229 almost half as likely to complete  $\geq 12$  school years compared with those in the comparison  
230 group (Table 2). The adjusted odds ratio (<sup>a</sup>OR) [99% CI] to complete  $\geq 12$  years of schooling  
231 stratified by parental SES, when comparing the childhood obesity cohort with the comparison

1  
2  
3 232 group, showed a trend towards lower OR in the higher level of SES: low parental SES = 0.69  
4  
5 233 [0.50 to 0.95],  $p=0.0026$ ; medium-low parental SES = 0.59 [0.48 to 0.72],  $p<0.0001$ ;  
6  
7 234 medium-high parental SES = 0.46 [0.35 to 0.60],  $p<0.0001$ ; high parental SES = 0.27 [0.14  
8  
9  
10 235 to 0.54],  $p<0.0001$ . P-value for interaction test for childhood obesity and parental SES  
11  
12 236 reaches a  $p$  of 0.0015.

13  
14  
15 237 The association of parental SES on school performance was more pronounced in the  
16  
17 238 comparison group than in the childhood obesity cohort. For example, stratified analyses show  
18  
19 239 that adjusted OR of completing  $\geq 12$  years in school in low SES compared with high SES in  
20  
21 240 the comparison group was 0.17 (99% CI 0.14 to 0.21,  $p<0.0001$ ) and in the childhood obesity  
22  
23 241 cohort 0.31 (99% CI 0.22 to 0.45,  $p<0.0001$ ). Regardless of how we divide the childhood  
24  
25 242 obesity population (into age- or calendar year at start of obesity treatment, SES sub-scores),  
26  
27 243 large differences between the two groups remain (Table 2 and S3 Table).

28  
29  
30  
31  
32 244  
33  
34  
35  
36  
37  
38  
39  
40  
41  
42  
43  
44  
45  
46  
47  
48  
49  
50  
51  
52  
53  
54  
55  
56  
57  
58  
59  
60

**Table 2. Crude and adjusted odds ratio (99% CI); p-value of subjects completing ≥12 years of schooling**

|                                               | Crude estimates              | Model 1, n=22 449            | Model 2, n=20 610            | Model 3, n=20 691            | Model 4, n=20 885            | Model 5, n=20 420            |
|-----------------------------------------------|------------------------------|------------------------------|------------------------------|------------------------------|------------------------------|------------------------------|
| Childhood obesity cohort vs. comparison group | 0.44 (0.40 to 0.48); <0.0001 | 0.57 (0.51 to 0.63); <0.0001 | 0.55 (0.50 to 0.62); <0.0001 | 0.54 (0.48 to 0.61); <0.0001 | 0.53 (0.48 to 0.59); <0.0001 | 0.59 (0.52 to 0.66); <0.0001 |
| Non-Nordic vs. Nordic                         | 0.70 (0.63 to 0.78); <0.0001 | 0.85 (0.75 to 0.97); 0.001   | 0.77 (0.67 to 0.88); <0.0001 | 0.87 (0.76 to 0.99); 0.0068  | 0.81 (0.71 to 0.92); <0.0001 | 0.97 (0.84 to 1.12); 0.5687  |
| ADHD/ADD vs. non-ADHD/ADD                     | 0.19 (0.17 to 0.23); <0.0001 | 0.28 (0.24 to 0.33); <0.0001 | 0.27 (0.22 to 0.33); <0.0001 | 0.27 (0.22 to 0.32); <0.0001 | 0.26 (0.22 to 0.31); <0.0001 | 0.28 (0.23 to 0.34); <0.0001 |
| Anxiety/depression vs. no anxiety/depression  | 0.31 (0.27 to 0.35); <0.0001 | 0.39 (0.34 to 0.45); <0.0001 | 0.36 (0.31 to 0.41); <0.0001 | 0.38 (0.33 to 0.44); <0.0001 | 0.39 (0.33 to 0.44); <0.0001 | 0.36 (0.31 to 0.42); <0.0001 |
| Parental SES                                  |                              |                              |                              |                              |                              |                              |
| Medium-low vs. low parental SES               | 1.74 (1.54 to 1.97); <0.0001 | 1.69 (1.48 to 1.93); <0.0001 |                              |                              |                              |                              |
| Medium-high vs. low parental SES              | 3.33 (2.92 to 3.81); <0.0001 | 2.99 (2.59 to 3.45); <0.0001 |                              |                              |                              |                              |
| High vs. low parental SES                     | 6.21 (5.19 to 7.44); <0.0001 | 5.40 (4.45 to 6.55); <0.0001 |                              |                              |                              |                              |
| Maternal education                            |                              |                              |                              |                              |                              |                              |
| Upper secondary school vs. compulsory school  | 1.88 (1.69 to 2.08); <0.0001 |                              | 1.63 (1.45 to 1.83); <0.0001 |                              |                              | 1.51 (1.34 to 1.71); <0.0001 |
| University degree vs. compulsory school       | 3.23 (2.86 to 3.66); <0.0001 |                              | 2.45 (2.12 to 2.83); <0.0001 |                              |                              | 2.17 (1.87 to 2.53); <0.0001 |
| Paternal education                            |                              |                              |                              |                              |                              |                              |
| Upper secondary school vs. compulsory school  | 1.88 (1.69 to 2.09); <0.0001 |                              | 1.58 (1.40 to 1.77); <0.0001 |                              |                              | 1.42 (1.26 to 1.60); <0.0001 |
| University degree vs. compulsory school       | 3.07 (2.66 to 3.55); <0.0001 |                              | 2.09 (1.77 to 2.45); <0.0001 |                              |                              | 1.81 (1.53 to 2.15); <0.0001 |
| Maternal income                               |                              |                              |                              |                              |                              |                              |
| Q2 vs. Q1                                     | 1.28 (1.15 to 1.43); <0.0001 |                              |                              | 1.25 (1.10 to 1.41); <0.0001 |                              | 1.07 (0.93 to 1.23); 0.2065  |
| Q3 vs. Q1                                     | 1.45 (1.28 to 1.63); <0.0001 |                              |                              | 1.35 (1.17 to 1.55); <0.0001 |                              | 1.05 (0.90 to 1.23); 0.4224  |
| Q4 vs. Q1                                     | 1.86 (1.60 to 2.15); <0.0001 |                              |                              | 1.52 (1.28 to 1.81); <0.0001 |                              | 1.07 (0.88 to 1.28); 0.3831  |
| Paternal income                               |                              |                              |                              |                              |                              |                              |
| Q2 vs. Q1                                     | 1.36 (1.19 to 1.55); <0.0001 |                              |                              | 1.31 (1.13 to 1.51); <0.0001 |                              | 1.07 (0.91 to 1.26); 0.2740  |
| Q3 vs. Q1                                     | 1.90 (1.67 to 2.17); <0.0001 |                              |                              | 1.70 (1.48 to 1.96); <0.0001 |                              | 1.24 (1.05 to 1.46); 0.0009  |
| Q4 vs. Q1                                     | 2.95 (2.58 to 3.36); <0.0001 |                              |                              | 2.47 (2.13 to 2.86); <0.0001 |                              | 1.58 (1.33 to 1.88); <0.0001 |
| Maternal occupational status                  |                              |                              |                              |                              |                              |                              |
| Occupation vs. no occupation                  | 2.15 (1.92 to 2.40); <0.0001 |                              |                              |                              | 1.72 (1.51 to 1.96); <0.0001 | 1.38 (1.19 to 1.61); <0.0001 |
| Paternal occupational status                  |                              |                              |                              |                              |                              |                              |
| Occupation vs. no occupation                  | 2.24 (1.99 to 2.52); <0.0001 |                              |                              |                              | 1.79 (1.57 to 2.04); <0.0001 | 1.41 (1.20 to 1.65); <0.0001 |

Abbreviations: CI, confidence interval; SES, socioeconomic status.

Model 1: Variables included were group (childhood obesity cohort vs. comparison group), migration background, ADHD/ADD, anxiety/depression, and parental SES

Model 2: Variables included were group, migration background, ADHD/ADD, anxiety/depression, maternal-, and paternal education

Model 3: Variables included were group, migration background, ADHD/ADD, anxiety/depression, maternal-, and paternal income

Model 4: Variables included were group, migration background, ADHD/ADD, anxiety/depression, maternal-, and paternal occupational status.

Model 5: Variables included were group, migration background, ADHD/ADD, anxiety/depression, maternal-, and paternal education, income, and occupational status.

1  
2  
3 246 Of note, having a non-Nordic-, compared to a Nordic background, was associated with  
4  
5 247 reduced odds to complete 12 or more years of schooling (Table 2). This was however not  
6  
7 248 observed in boys in the childhood obesity cohort ( $p=0.68$ ). Further, excluding individuals  
8  
9 249 with a non-Swedish background, or ADHD/ADD, or anxiety/depression in sensitivity  
10  
11 250 analyses, did not alter the association between childhood obesity and attained level of  
12  
13 251 education. For example, when excluding individuals with a non-Swedish background, the  
14  
15 252 <sup>a</sup>OR to complete  $\geq 12$  years in school for the obesity cohort vs. the comparison group was  
16  
17 253 0.55 [0.48 to 0.63],  $p < 0.0001$ .

## 22 254 **Degree of obesity and treatment response on completed**

### 23 255 **educational level in children with obesity**

24  
25  
26  
27  
28  
29 256 In the childhood obesity cohort, the mean age at start of treatment was 13.5 years (99% CI:  
30  
31 257 13.45 to 13.62) and the mean BMI SDS was +2.91 (99% CI: 2.89 to 2.92). The median  
32  
33 258 treatment duration was 2.83 years (IQR: 1.86 to 4.42) and the mean treatment response,  
34  
35 259 calculated using BMI SDS from the first to the last clinical visit, was -0.13 (99% CI: -0.15  
36  
37 260 to -0.10,  $n=2,709$ , 68.7%, dropouts excluded). At baseline, 50.7% had obesity and 49.3% had  
38  
39 261 morbid obesity. At last measured weight and height, 33.4% had obesity and 47.2% had  
40  
41 262 morbid obesity, while 19.4% of the children no longer had obesity (dropouts excluded).

42  
43  
44  
45  
46 263 A greater degree of obesity at start of treatment lowered the odds of completing  $\geq 12$  years of  
47  
48 264 schooling, <sup>a</sup>OR [99% CI] = 0.51 [0.40 to 0.64],  $p < 0.0001$ , per one unit increase in BMI SDS,  
49  
50 265 while age at start of obesity treatment did not influence the outcome (Table 3). Treatment  
51  
52 266 response was categorized as good response ( $n=847$ ), no response ( $n=1\ 315$ ), poor response  
53  
54 267 ( $n=547$ ), and dropouts ( $n=1,233$ ). Of those with good treatment response, 67% completed

1  
2  
3 268  $\geq 12$  years in school compared with 58%, 52%, and 50% in the groups with no or poor  
4  
5 269 response, and dropouts, respectively ( $p < 0.0001$ ). Within all SES groups, except for high SES,  
6  
7 270 greater treatment response resulted in higher odds of completing  $\geq 12$  years in school (Fig 3).  
8  
9 271 Dropouts were less likely to complete  $\geq 12$  years in school compared with non-responders  
10  
11 272 (Table 3) but this was not observed in the high SES group (Fig 3). Duration of treatment  
12  
13 273 differed between children with good and poor treatment response (3.5 vs. 4.0 years;  
14  
15 274  $p < 0.0001$ ). In the childhood obesity cohort, the association between parental SES and odds  
16  
17 275 of completing  $\geq 12$  years of schooling was not modified by treatment response ( $p = 0.603$ ).  
18  
19  
20  
21  
22  
23  
24  
25  
26  
27  
28  
29  
30  
31  
32  
33  
34  
35  
36  
37  
38  
39  
40  
41  
42  
43  
44  
45  
46  
47  
48  
49  
50  
51  
52  
53  
54  
55  
56  
57  
58  
59  
60



**Table 3. Crude and adjusted odds ratios of completing  $\geq 12$  years of schooling in the childhood obesity cohort**

|                                              | Odds ratio (99% CI) performed with ordinary logistic regression; p value |                              |                              |
|----------------------------------------------|--------------------------------------------------------------------------|------------------------------|------------------------------|
|                                              | Crude estimates                                                          | Model 1, n=3 921             | Model 2, n=3 575             |
| Sex (girls vs. boys)                         | 1.26 (1.06 to 1.48); 0.0004                                              | 1.30 (1.08 to 1.56); 0.0002  | 1.29 (1.06 to 1.56); 0.0008  |
| Migration background (non-Nordic vs. Nordic) | 0.78 (0.65 to 0.94); 0.0006                                              | 0.74 (0.60 to 0.91); 0.0002  | 0.69 (0.55 to 0.87); <0.0001 |
| ADHD/ADD (yes vs. no)                        | 0.31 (0.25 to 0.40); <0.0001                                             | 0.35 (0.27 to 0.45); <0.0001 | 0.33 (0.26 to 0.44); <0.0001 |
| Anxiety/depression (yes vs. no)              | 0.43 (0.35 to 0.53); <0.0001                                             | 0.45 (0.36 to 0.57); <0.0001 | 0.43 (0.34 to 0.55); <0.0001 |
| BMI SDS at start of treatment                | 0.47 (0.38 to 0.58); <0.0001                                             | 0.51 (0.40 to 0.64); <0.0001 | 0.48 (0.38 to 0.62); <0.0001 |
| Age at start of treatment                    | 0.96 (0.93 to 1.01); 0.0234                                              | 1.01 (0.96 to 1.06); 0.60    | 1.01 (0.96 to 1.06); 0.805   |
| Treatment response*                          |                                                                          |                              |                              |
| Good response vs. no response                | 1.46 (1.15 to 1.85); <0.0001                                             | 1.34 (1.04 to 1.72); 0.0031  | 1.28 (0.98 to 1.67); 0.0182  |
| Poor response vs. no response                | 0.78 (0.60 to 1.02); 0.0167                                              | 0.72 (0.54 to 0.96); 0.0028  | 0.71 (0.53 to 0.96); 0.003   |
| Dropouts vs. no response                     | 0.71 (0.58 to 0.87); <0.0001                                             | 0.69 (0.55 to 0.86); <0.0001 | 0.68 (0.54 to 0.87); <0.0001 |
| Parental SES                                 |                                                                          |                              |                              |
| Medium-low vs. low parental SES              | 1.63 (1.31 to 2.03); <0.0001                                             | 1.56 (1.24 to 1.98); <0.0001 |                              |
| Medium-high vs. low parental SES             | 2.40 (1.90 to 3.05); <0.0001                                             | 2.19 (1.69 to 2.83); <0.0001 |                              |
| High vs. low parental SES                    | 2.99 (2.11 to 4.22); <0.0001                                             | 2.83 (1.95 to 4.12); <0.0001 |                              |
| Maternal education                           |                                                                          |                              |                              |
| Upper secondary school vs. compulsory school | 1.74 (1.44 to 2.09); <0.0001                                             |                              | 1.57 (1.27 to 1.94); <0.0001 |
| University degree vs. compulsory school      | 2.47 (1.94 to 3.16); <0.0001                                             |                              | 2.23 (1.67 to 2.98); <0.0001 |
| Paternal education                           |                                                                          |                              |                              |
| Upper secondary school vs. compulsory school | 1.48 (1.23 to 1.79); <0.0001                                             |                              | 1.26 (1.03 to 1.55); 0.004   |
| University degree vs. compulsory school      | 1.92 (1.44 to 2.56); <0.0001                                             |                              | 1.41 (1.01 to 1.95); 0.0076  |

Abbreviations: CI, confidence interval; BMI SDS, BMI standard deviation score; SES, socioeconomic status.

\* Good response=decrease of BMI SDS  $\geq 0.25$  units; No response=BMI SDS +/- 0.24 units; Poor response=increase of BMI SDS  $\geq 0.25$  units; Dropouts=no follow-up measure or less than one year between their first and last measure.

Model 1: Variables included were sex, migration background, ADHD/ADD, anxiety/depression, BMI SDS- and age at start of treatment, treatment response, and parental SES.

Model 2: Variables included were sex, migration background, ADHD/ADD, anxiety/depression, BMI SDS- and age at start of treatment, treatment response, maternal-, and paternal education.

276

277

## 278 Discussion

279 In this prospective cohort study, we have compared level of education among individuals  
280 recorded in the Swedish Childhood Obesity Treatment Register, and a comparison group  
281 matched by sex, year of birth, and living area. Individuals in the childhood obesity cohort were  
282 half as likely to complete 12 or more years of schooling, independently of parental  
283 socioeconomic status (SES).

284 Among individuals from high SES families, those in the childhood obesity cohort were  
285 approximately one third as likely to complete  $\geq 12$  years of schooling as individuals from high  
286 SES families in the comparison group. Furthermore, our results indicate that parental SES was  
287 more important to complete  $\geq 12$  school years in the comparison group than in the childhood  
288 obesity cohort. An association between obesity and impaired academic achievements has been  
289 demonstrated before.<sup>8 9</sup> To which extent other psychosocial factors contribute to this finding  
290 has not been evaluated. It is well established that low parental SES,<sup>13-15</sup> immigrant background,<sup>9</sup>  
291 <sup>14</sup> ADHD/ADD,<sup>9 17</sup> and depression,<sup>9 14 16</sup> may negatively affect performance in school. These  
292 factors are also overrepresented in the paediatric population with obesity. In this study, we can  
293 confirm that low parental SES, neuropsychiatric disorders, and anxiety/depression are more  
294 common in children with obesity and contribute to the decreased odds of completing  $\geq 12$  school  
295 years. However, we found that obesity in childhood is a considerable risk factor for not  
296 completing  $\geq 12$  years of schooling even after taking these and other important risk factors into  
297 account.

## 298 Obesity treatment outcome and educational level

1  
2  
3 299 We identified a positive association between weight-loss during obesity treatment and  
4  
5 300 completed educational level, which confirms our previously reported data unadjusted for SES.<sup>9</sup>  
6  
7 301 Children with good treatment response, compared with those with no response, were more  
8  
9 302 likely to complete  $\geq 12$  school years in all SES groups. A decrease of 0.25 BMI SDS, that has  
10  
11 303 previously been shown to improve metabolic health,<sup>27</sup> we can now also show may have a  
12  
13 304 positive association on completing  $\geq 12$  years of schooling. However, the positive effects of  
14  
15 305 successful obesity treatment did not compensate for the observed SES differences on attained  
16  
17 306 level of education.

18  
19  
20  
21  
22 307 In Sweden, 12 years of schooling is not mandatory, but the long-term social effects are  
23  
24 308 considerable for those who fail. It has been estimated that 50% of those who fail to complete  
25  
26 309  $\geq 12$  school years face a situation of being left outside the society with poor psychosocial health  
27  
28 310 and large costs for the society.<sup>28</sup> Thus, it is possible that school failure will further worsen the  
29  
30 311 health perspective of adolescents with obesity.

## 312 **Potential mechanisms between obesity, weight loss, and school** 313 **performance**

314 Several parameters may interplay when measuring school completion, e.g. resourcefulness,  
315 intelligence, or ability to conform. Nevertheless, the mechanisms by which obesity influences  
316 school performance are unclear but are likely multifactorial and complex. Possible mechanisms  
317 may include psychosocial aspects such as stigma<sup>29</sup> and increased risk for anxiety and  
318 depression.<sup>7</sup> Physiological mechanisms may be mediated by anatomical changes such as  
319 atrophy of the frontal lobe and reduced hippocampal volume have been demonstrated in  
320 individuals with obesity.<sup>30</sup> Some of the reported cognitive dysfunctions in children and  
321 adolescents with obesity include slower response times when performing visuospatial attention  
322 tasks,<sup>31</sup> diminished executive functions, such as working memory,<sup>32</sup> and slower cognitive

1  
2  
3 323 performance speed.<sup>33</sup> In addition, obesity-related comorbidities such as insulin resistance,<sup>34</sup>  
4  
5 324 type 2 diabetes mellitus,<sup>35</sup> chronic low-grade inflammation,<sup>36</sup> and the metabolic syndrome<sup>37</sup>  
6  
7 325 have also been associated with impaired executive function, memory performance, attention,  
8  
9 326 and cognitive flexibility. A high fat diet in rodents demonstrated detrimental effects on memory  
10  
11 327 and executive functions.<sup>30</sup>  
12  
13  
14

15 328 At least some of these effects seem to be reversible, which may add to the positive associations  
16  
17 329 we observed of weight loss on school outcome. Weight loss may have a direct positive effect  
18  
19 330 on cognitive functions.<sup>38</sup> Extensive weight loss via bariatric surgery improves insulin sensitivity  
20  
21 331 and decreases systematic inflammation,<sup>39</sup> and it has been suggested that these factors affect  
22  
23 332 cognitive functions.<sup>40</sup>  
24  
25  
26

27 333 However, children with obesity are often stigmatized,<sup>41</sup> have a low self-esteem, and are exposed  
28  
29 334 to bullying and social exclusion.<sup>42</sup> All these factors have most likely a negative impact on school  
30  
31 335 performance. In contrast, a strong social network is most probably an important factor both for  
32  
33 336 good treatment response and achievement in school. An inverse association has been observed  
34  
35 337 between familial social support and child weight status.<sup>43</sup> The relationship between BMI and  
36  
37 338 school completion may also be biased from e.g. assortative mating and dynastic effects which  
38  
39 339 have shown to reduce causal effects.<sup>44</sup> There is also a suggested interplay between genetic  
40  
41 340 variants and environmental factors that may affect intelligence.<sup>45</sup> Thus, it is likely that both  
42  
43 341 negative social effects of obesity and obesity-related morbidity, as well as genetic factors,  
44  
45 342 contribute to the adverse association of childhood obesity on completed educational level.<sup>7 29 41</sup>  
46  
47  
48  
49

50 343 <sup>45</sup>  
51  
52

## 53 344 **Limitations**

54  
55  
56  
57 345 Using longitudinal data from several national registers provided an opportunity to assess the  
58  
59 346 impact of obesity on completed educational level, adjusted for several important confounders.  
60

1  
2  
3 347 Data on both exposure and outcome were prospectively collected and defined according to  
4  
5 348 standardized international classifications.<sup>19 26</sup>  
6  
7

8 349 However, some important limitations should be recognized. We did not have anthropometric  
9  
10 350 data on children in the comparison group. There is no representative national data on children  
11  
12 351 with obesity in Sweden. As our comparison group includes children with obesity, although  
13  
14 352 likely less than 1% according to obesity diagnoses found in the National Patient Register, odds  
15  
16 353 of lower level of education associated with obesity might be underestimated. It is also important  
17  
18 354 to consider that children receiving obesity treatment may not be representative of all children  
19  
20 355 with obesity. It should further be noted that parental SES was based on data from one specific  
21  
22 356 year in the child's life and not over the child's entire adolescent lifetime, and that the SES  
23  
24 357 indicators used may not reflect the whole SES spectrum. In addition, the impact of anxiety and  
25  
26 358 depression on educational level may be underestimated since these conditions often are under-  
27  
28 359 diagnosed. We urge the reader to bear in mind that despite several possible mechanisms have  
29  
30 360 been proposed, causal relationships of obesity and the effect of treatment on the outcome  
31  
32 361 remains to be established. Lastly, factors such as free education, school lunches, and students'  
33  
34 362 health care may have an impact on the generalizability of our data to other populations.  
35  
36  
37  
38  
39  
40

## 41 363 **Conclusion**

42  
43  
44  
45 364 In this longitudinal, population-based study, individuals with obesity in childhood were less  
46  
47 365 likely to complete 12 or more years of schooling, compared with a group from the general  
48  
49 366 population. The odds associated with obesity remained significantly increased even after taking  
50  
51 367 parental SES and other important risk factors, such as ADHD, into consideration. The  
52  
53 368 underlying mechanisms are unclear but previous studies indicate that the effects of obesity on  
54  
55 369 school completion both involve psychosocial effects and cognitive functions.<sup>16 17 32</sup> The  
56  
57 370 negative impact of childhood obesity on educational level may partly be reversed by successful  
58  
59  
60

1  
2  
3 371 obesity treatment in childhood. Results from this study underline effects of childhood obesity  
4  
5 372 on schooling. For the sake of an optimal educational environment, it is of great importance to  
6  
7 373 increase awareness both in schools and among decision makers to allocate resources for  
8  
9 374 potential extra support, e.g. reduce stigma and increase educational support.  
10  
11  
12

### 13 375 **Acknowledgements**

14  
15 376 The authors would like to thank all local health care professionals in Sweden working with  
16  
17 377 children and adolescents with obesity and their valuable work with BORIS, and the BORIS  
18  
19 378 steering committee for establishing and maintaining the register.  
20  
21  
22

### 23 379 **Author contributions**

24  
25 380 Conceptualization: Louise Lindberg, Pernilla Danielsson, Martina Persson, Claude Marcus,  
26  
27 381 Emilia Hagman.

28  
29 382 Data curation: Louise Lindberg.

30  
31 383 Formal analysis: Louise Lindberg, Emilia Hagman.

32  
33 384 Funding acquisition: Louise Lindberg, Claude Marcus, Emilia Hagman.

34  
35 385 Methodology: Louise Lindberg, Emilia Hagman.

36  
37 386 Project administration: Louise Lindberg, Emilia Hagman.

38  
39 387 Supervision: Martina Persson, Emilia Hagman, Pernilla Danielsson, Claude Marcus.

40  
41 388 Writing – original draft: Louise Lindberg.

42  
43 389 Writing – review & editing: Louise Lindberg, Pernilla Danielsson, Martina Persson, Claude  
44  
45 390 Marcus, Emilia Hagman.

46  
47 391

### 48 392 **Funding statement**

49  
50 393 This study was supported by funds to LL by Crown Princess Lovisa's Foundation (2017-  
51  
52 394 00348), Samariten Foundation (2017-0305), the Stockholm FreeMason Foundation for  
53  
54 395 Children's Welfare, Sällskapet Barnavård, Anna-Lisa och Arne Gustafssons Foundation,  
55  
56  
57  
58  
59  
60

1  
2  
3 396 Solstickan Foundation and Sven Jerring Foundation. EH was supported by the Swedish Society  
4  
5 397 for Medical Research, Fredrik and Ingrid Thuring's Foundation (2017-00309) and Magnus  
6  
7 398 Bergvall Foundation (2017-02113), and CM by the Swedish Heart and Lung Foundation  
8  
9  
10 399 (20150790).

## 13 400 **Data Sharing statement**

15 401 The data that support the findings of this study contains sensitive information. Restrictions  
16  
17 402 therefore apply to the availability of these data, which were used under license for the current  
18  
19 403 study, and so are not publicly available. According to Swedish law and the General Data  
20  
21 404 Protection Regulation, the authors are not permitted to share the datasets used in this study with  
22  
23 405 third parties. Given that an ethical approval is obtained, any individual may apply for data from  
24  
25 406 Statistics Sweden via [information@scb.se](mailto:information@scb.se), the Swedish National Board of Health and Welfare  
26  
27 407 via [registerservice@socialstyrelsen.se](mailto:registerservice@socialstyrelsen.se), and the Swedish Childhood Obesity Treatment Register  
28  
29 408 via <http://www.e-boris.se/kontaktuppgifter/>.

## 34 409 **Competing interests**

36 410 All authors have completed the ICMJE uniform disclosure form at  
37  
38 411 [www.icmje.org/coi\\_disclosure.pdf](http://www.icmje.org/coi_disclosure.pdf) and declare: no support from any organisation for the  
39  
40 412 submitted work; no financial relationships with any organisations that might have an interest in  
41  
42 413 the submitted work in the previous three years; no other relationships or activities that could  
43  
44 414 appear to have influenced the submitted.

48  
49 415

416 **References**

- 417 1. Abarca-Gómez L, Abdeen ZA, Hamid ZA, et al. Worldwide trends in body-mass index, underweight,  
418 overweight, and obesity from 1975 to 2016: a pooled analysis of 2416 population-based  
419 measurement studies in 128.9 million children, adolescents, and adults. *The Lancet* 2017 doi:  
420 10.1016/S0140-6736(17)32129-3
- 421 2. Hagman E, Danielsson P, Brandt L, et al. Association between impaired fasting glycaemia in  
422 pediatric obesity and type 2 diabetes in young adulthood. *Nutr Diabetes* 2016;6(8):e227. doi:  
423 10.1038/nutd.2016.34 [published Online First: 2016/08/23]
- 424 3. Hagman E, Danielsson P, Elimam A, et al. The effect of weight loss and weight gain on blood  
425 pressure in children and adolescents with obesity. *Int J Obes (Lond)* 2019;43(10):1988-94.  
426 doi: 10.1038/s41366-019-0384-2 [published Online First: 2019/06/04]
- 427 4. Lindberg L, Danielsson P, Persson M, et al. Association of childhood obesity with risk of early all-  
428 cause and cause-specific mortality: A Swedish prospective cohort study. *PLoS medicine*  
429 2020;17(3):e1003078. doi: 10.1371/journal.pmed.1003078 [published Online First:  
430 2020/03/19]
- 431 5. Reilly JJ, Kelly J. Long-term impact of overweight and obesity in childhood and adolescence on  
432 morbidity and premature mortality in adulthood: systematic review. *Int J Obes (Lond)*  
433 2011;35(7):891-8. doi: 10.1038/ijo.2010.222
- 434 6. Viner RM, Cole TJ. Adult socioeconomic, educational, social, and psychological outcomes of  
435 childhood obesity: a national birth cohort study. *BMJ* 2005;330(7504):1354. doi:  
436 10.1136/bmj.38453.422049.E0 [published Online First: 2005/05/20]
- 437 7. Lindberg L, Hagman E, Danielsson P, et al. Anxiety and depression in children and adolescents with  
438 obesity: a nationwide study in Sweden. *BMC medicine* 2020;18(1):30. doi: 10.1186/s12916-  
439 020-1498-z [published Online First: 2020/02/23]
- 440 8. Laitinen J, Power C, Ek E, et al. Unemployment and obesity among young adults in a northern  
441 Finland 1966 birth cohort. *International journal of obesity and related metabolic disorders :  
442 journal of the International Association for the Study of Obesity* 2002;26(10):1329-38. doi:  
443 10.1038/sj.ijo.0802134
- 444 9. Hagman E, Danielsson P, Brandt L, et al. Childhood Obesity, Obesity Treatment Outcome, and  
445 Achieved Education: A Prospective Cohort Study. *The Journal of adolescent health : official  
446 publication of the Society for Adolescent Medicine* 2017 doi:  
447 10.1016/j.jadohealth.2017.04.009 [published Online First: 2017/07/12]
- 448 10. Karnehed N, Rasmussen F, Hemmingsson T, et al. Obesity and attained education: cohort study of  
449 more than 700,000 Swedish men. *Obesity* 2006;14(8):1421-28.
- 450 11. French SA, Wall M, Corbeil T, et al. Obesity in Adolescence Predicts Lower Educational Attainment  
451 and Income in Adulthood: The Project EAT Longitudinal Study. *Obesity (Silver Spring)*  
452 2018;26(9):1467-73. doi: 10.1002/oby.22273 [published Online First: 2018/09/19]
- 453 12. Shrewsbury V, Wardle J. Socioeconomic status and adiposity in childhood: a systematic review of  
454 cross-sectional studies 1990-2005. *Obesity (Silver Spring)* 2008;16(2):275-84. doi:  
455 10.1038/oby.2007.35 [published Online First: 2008/02/02]
- 456 13. Koivusilta LK, West P, Saaristo VM, et al. From childhood socio-economic position to adult  
457 educational level - do health behaviours in adolescence matter? A longitudinal study. *BMC  
458 public health* 2013;13:711. doi: 10.1186/1471-2458-13-711
- 459 14. Kark M, Hjern A, Rasmussen F. Poor school performance is associated with a larger gain in body  
460 mass index during puberty. *Acta Paediatr* 2014;103(2):207-13. doi: 10.1111/apa.12471
- 461 15. DeGarmo DS, Forgatch MS, Martinez CR, Jr. Parenting of divorced mothers as a link between  
462 social status and boys' academic outcomes: unpacking the effects of socioeconomic status.  
463 *Child development* 1999;70(5):1231-45. [published Online First: 1999/11/05]



- 1  
2  
3 464 16. Freeman A, Tyrovolas S, Koyanagi A, et al. The role of socio-economic status in depression: results  
4 465 from the COURAGE (aging survey in Europe). *BMC public health* 2016;16(1):1098. doi:  
5 466 10.1186/s12889-016-3638-0 [published Online First: 2016/10/21]  
6 467 17. Scholtens S, Rydell AM, Yang-Wallentin F. ADHD symptoms, academic achievement, self-  
7 468 perception of academic competence and future orientation: a longitudinal study.  
8 469 *Scandinavian journal of psychology* 2013;54(3):205-12. doi: 10.1111/sjop.12042 [published  
9 470 Online First: 2013/03/21]  
11 471 18. Quek YH, Tam WWS, Zhang MWB, et al. Exploring the association between childhood and  
12 472 adolescent obesity and depression: a meta-analysis. *Obesity reviews : an official journal of*  
13 473 *the International Association for the Study of Obesity* 2017;18(7):742-54. doi:  
14 474 10.1111/obr.12535 [published Online First: 2017/04/13]  
15 475 19. Cole TJ, Lobstein T. Extended international (IOTF) body mass index cut-offs for thinness,  
16 476 overweight and obesity. *Pediatr Obes* 2012;7(4):284-94. doi: 10.1111/j.2047-  
17 477 6310.2012.00064.x  
19 478 20. Hagman E, Danielsson P, Lindberg L, et al. Paediatric obesity treatment during 14 years in  
20 479 Sweden: Lessons from the Swedish Childhood Obesity Treatment Register-BORIS. *Pediatr*  
21 480 *Obes* 2020;15(7):e12626. doi: 10.1111/ijpo.12626 [published Online First: 2020/02/20]  
22 481 21. Ludvigsson JF, Otterblad-Olausson P, Pettersson BU, et al. The Swedish personal identity number:  
23 482 possibilities and pitfalls in healthcare and medical research. *European journal of*  
24 483 *epidemiology* 2009;24(11):659-67. doi: 10.1007/s10654-009-9350-y  
25 484 22. Ludvigsson JF, Almqvist C, Bonamy AK, et al. Registers of the Swedish total population and their  
26 485 use in medical research. *European journal of epidemiology* 2016;31(2):125-36. doi:  
27 486 10.1007/s10654-016-0117-y [published Online First: 2016/01/16]  
28 487 23. Ludvigsson JF, Andersson E, Ekblom A, et al. External review and validation of the Swedish  
29 488 national inpatient register. *BMC public health* 2011;11:450. doi: 10.1186/1471-2458-11-450  
30 489 [published Online First: 2011/06/11]  
31 490 24. Wallerstedt SM, Wettermark B, Hoffmann M. The First Decade with the Swedish Prescribed Drug  
32 491 Register - A Systematic Review of the Output in the Scientific Literature. *Basic & clinical*  
33 492 *pharmacology & toxicology* 2016;119(5):464-69. doi: 10.1111/bcpt.12613 [published Online  
34 493 First: 2016/04/27]  
35 494 25. Brooke HL, Talback M, Hornblad J, et al. The Swedish cause of death register. *European journal of*  
36 495 *epidemiology* 2017;32(9):765-73. doi: 10.1007/s10654-017-0316-1 [published Online First:  
37 496 2017/10/07]  
38 497 26. UNESCO. International standard classification of education: Isced 1997. Re-edition. Paris: UNESCO  
39 498 Institute for Statistics. 2011  
40 499 27. Ford AL, Hunt LP, Cooper A, et al. What reduction in BMI SDS is required in obese adolescents to  
41 500 improve body composition and cardiometabolic health? *Archives of disease in childhood*  
42 501 2010;95(4):256-61. doi: 10.1136/adc.2009.165340 [published Online First: 2009/12/08]  
43 502 28. Nilsson I, Wadeskog A. Utanförskapets Ekonomiska Sociotoper: Socioekonomisk analys på  
44 503 stadsdelsnivå inom ramen för Healthy Cities 2012  
45 504 29. Finn KE, Seymour CM, Phillips AE. Weight bias and grading among middle and high school  
46 505 teachers. *Br J Educ Psychol* 2019 doi: 10.1111/bjep.12322 [published Online First:  
47 506 2019/10/28]  
48 507 30. Nguyen JC, Killcross AS, Jenkins TA. Obesity and cognitive decline: role of inflammation and  
49 508 vascular changes. *Frontiers in neuroscience* 2014;8:375. doi: 10.3389/fnins.2014.00375  
50 509 [published Online First: 2014/12/06]  
51 510 31. Tsai C-L, Chen F-C, Pan C-Y, et al. The neurocognitive performance of visuospatial attention in  
52 511 children with obesity. *Frontiers in psychology* 2016;7  
53 512 32. Laurent JS, Watts R, Adise S, et al. Associations Among Body Mass Index, Cortical Thickness, and  
54 513 Executive Function in Children. *JAMA Pediatr* 2019 doi: 10.1001/jamapediatrics.2019.4708  
55 514 [published Online First: 2019/12/10]  
56  
57  
58  
59  
60

- 1  
2  
3 515 33. Sweat V, Yates KF, Migliaccio R, et al. Obese adolescents show reduced cognitive processing  
4 516 speed compared with healthy weight peers. *Childhood Obesity* 2017  
5 517 34. Cheke LG, Bonnici HM, Clayton NS, et al. Obesity and insulin resistance are associated with  
6 518 reduced activity in core memory regions of the brain. *Neuropsychologia* 2017;96:137-49.  
7 519 35. Bruehl H, Sweat V, Tirsi A, et al. Obese Adolescents with Type 2 Diabetes Mellitus Have  
8 520 Hippocampal and Frontal Lobe Volume Reductions. *Neuroscience and medicine* 2011;2(1):34-  
9 521 42. doi: 10.4236/nm.2011.21005  
10 522 36. Spyridaki EC, Simos P, Avgoustinaki PD, et al. The association between obesity and fluid  
11 523 intelligence impairment is mediated by chronic low-grade inflammation. *British Journal of*  
12 524 *Nutrition* 2014;112(10):1724-34.  
13 525 37. Mangone A, Yates KF, Sweat V, et al. Cognitive functions among predominantly minority urban  
14 526 adolescents with metabolic syndrome. *Applied Neuropsychology: Child* 2017:1-7.  
15 527 38. Alosco ML, Spitznagel MB, Strain G, et al. Improved memory function two years after bariatric  
16 528 surgery. *Obesity* 2014;22(1):32-38.  
17 529 39. Olbers T, Beamish AJ, Gronowitz E, et al. Laparoscopic Roux-en-Y gastric bypass in adolescents  
20 530 with severe obesity (AMOS): a prospective, 5-year, Swedish nationwide study. *Lancet*  
21 531 *Diabetes Endocrinol* 2017;5(3):174-83. doi: 10.1016/S2213-8587(16)30424-7  
22 532 40. Biessels GJ, Reagan LP. Hippocampal insulin resistance and cognitive dysfunction. *Nature Reviews*  
23 533 *Neuroscience* 2015;16(11):660.  
24 534 41. Latner JD, Stunkard AJ. Getting worse: the stigmatization of obese children. *Obesity research*  
25 535 2003;11(3):452-6. doi: 10.1038/oby.2003.61  
26 536 42. Pierce JW, Wardle J. Cause and effect beliefs and self-esteem of overweight children. *Journal of*  
27 537 *child psychology and psychiatry, and allied disciplines* 1997;38(6):645-50. [published Online  
28 538 First: 1997/10/08]  
29 539 43. Lindberg L, Ek A, Nyman J, et al. Low grandparental social support combined with low parental  
30 540 socioeconomic status is closely associated with obesity in preschool-aged children: a pilot  
31 541 study. *Pediatr Obes* 2015 doi: 10.1111/ijpo.12049  
32 542 44. Brumpton B, Sanderson E, Heilbron K, et al. Avoiding dynastic, assortative mating, and population  
33 543 stratification biases in Mendelian randomization through within-family analyses. *Nature*  
34 544 *communications* 2020;11(1):3519. doi: 10.1038/s41467-020-17117-4 [published Online First:  
35 545 2020/07/16]  
36 546 45. Plomin R, von Stumm S. The new genetics of intelligence. *Nature reviews Genetics*  
37 547 2018;19(3):148-59. doi: 10.1038/nrg.2017.104 [published Online First: 2018/01/18]  
38  
39  
40  
41 548  
42  
43  
44  
45  
46  
47  
48  
49  
50  
51  
52  
53  
54  
55  
56  
57  
58  
59  
60

## 549 **Supporting information**

550 **S1 Table. International Classification of Diseases (ICD 10<sup>th</sup> revision) codes and**  
551 **Anatomical Therapeutic Chemical (ATC) classification system codes used.**

552 **S2 Table. Proportion of children completing  $\geq 12$  years of schooling.**

553 **S3 Table. Proportion of individuals who have undergone obesity treatment in childhood**  
554 **who completed  $\geq 12$  years of schooling by calendar year and by age at start of obesity**  
555 **treatment (n=3,942).**

556

557

## 558 **Figure Legends**

559 **Fig 1. Participant flowchart.**

560

561 **Fig 2. Percentage of individuals completing  $\geq 12$  years of schooling by SES level in the**  
562 **childhood obesity cohort (n=3,921, ) and the comparison group (n=18,528).**

563

564 **Fig 3. Crude percentage of individuals with obesity in childhood (n=3,921) completing  $\geq 12$**   
565 **school years by parental SES and treatment response. p=p for trend; n=refers to number**  
566 **of individuals in each category.**

567

1  
2  
3  
4  
5  
6  
7  
8  
9  
10  
11  
12  
13  
14  
15  
16  
17  
18  
19  
20  
21  
22  
23  
24  
25  
26  
27  
28  
29  
30  
31  
32  
33  
34  
35  
36  
37  
38  
39  
40  
41  
42  
43  
44  
45  
46  
47  
48  
49  
50  
51  
52  
53  
54  
55  
56  
57  
58  
59  
60



Figure 1

169x73mm (300 x 300 DPI)

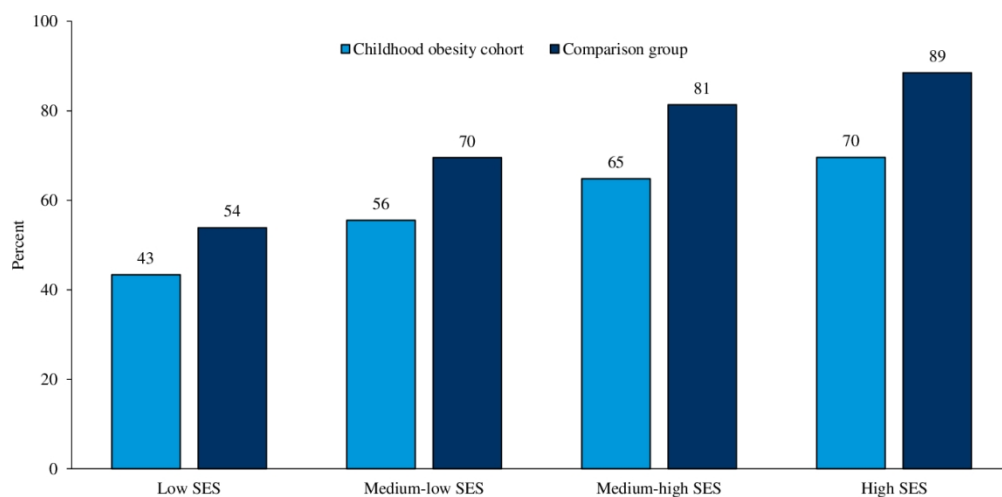

Fig 2. Percentage of individuals completing  $\geq 12$  years of schooling by SES level in the childhood obesity cohort (n=3,921) and the comparison group (n=18,528).

118x57mm (300 x 300 DPI)

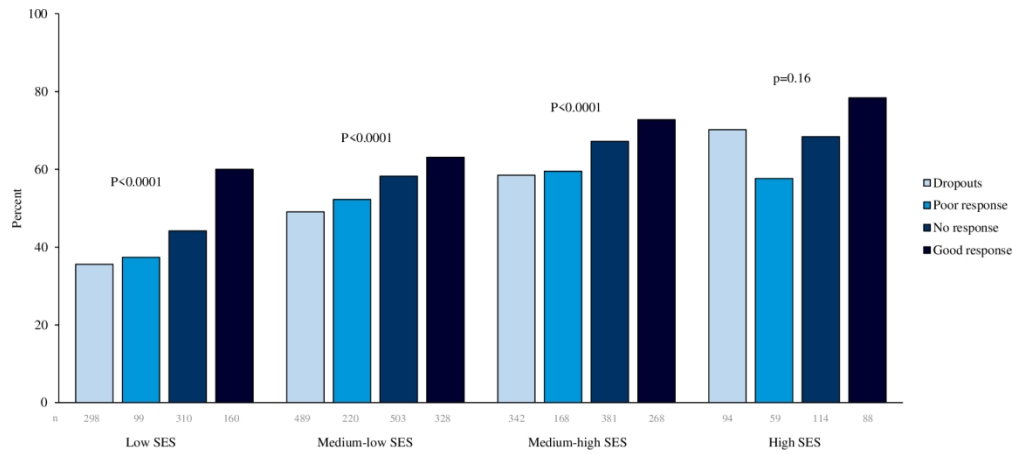

Fig 3. Crude percentage of individuals with obesity in childhood (n=3,921) completing  $\geq 12$  school years by parental SES and treatment response. p=p for trend; n=refers to number of individuals in each category.

150x66mm (300 x 300 DPI)

**S1 Table. International Classification of Diseases (ICD 10<sup>th</sup> revision) codes and Anatomical Therapeutic Chemical (ATC) classification system codes used.**

| Condition                  | ICD-10                                         | ATC Code |
|----------------------------|------------------------------------------------|----------|
| Anxiety/sedatives          | F40.0-F40.1, F41-F42, F51.4-F51.9, F93.0-F93.2 | N05B     |
| Depression/antidepressants | F32-F39, F92                                   | N06A     |
| ADHD/ADD                   | F90                                            | N06B     |
| Mental retardation         | F70-F79                                        |          |
| Genetic syndromes          |                                                |          |
| Fragile X                  | Q99.2                                          |          |
| Klinefelter                | Q98                                            |          |
| Laurence-Moon-Bardet-Biedl | Q87.8B                                         |          |
| Mb Down                    | Q90                                            |          |
| Noonan                     | Q87.1E                                         |          |
| Prader-Willi               | Q87.1F                                         |          |
| Silver Russell             | Q87.1G                                         |          |
| Turner                     | Q96                                            |          |

**S2 Table. Proportion of children completing  $\geq 12$  years of schooling**

|                              | Childhood obesity cohort |      | Comparison group |      | p-value <sup>¶</sup> |
|------------------------------|--------------------------|------|------------------|------|----------------------|
|                              | n                        | %    | n                | %    |                      |
| Total                        | 2,236                    | 56.7 | 13,939           | 74.4 | <0.0001              |
| Sex                          |                          |      |                  |      |                      |
| Girl                         | 1,090                    | 59.7 | 6,843            | 78.7 | <0.0001              |
| Boy                          | 1,146                    | 54.1 | 7,096            | 70.8 | <0.0001              |
| Migration background         |                          |      |                  |      |                      |
| Nordic                       | 1,695                    | 58.4 | 10,974           | 78.1 | <0.0001              |
| Non-Nordic                   | 541                      | 52.2 | 2,965            | 63.4 | <0.0001              |
| ADHD/ADD                     |                          |      |                  |      |                      |
| Non-ADHD/ADD                 | 2,032                    | 61.1 | 13,528           | 76.5 | <0.0001              |
| ADHD/ADD                     | 204                      | 33.1 | 411              | 39.4 | 0.01                 |
| Anxiety/depression           |                          |      |                  |      |                      |
| No anxiety/depression        | 1,902                    | 61.1 | 12,754           | 77.0 | <0.0001              |
| Anxiety/depression           | 334                      | 40.2 | 1,185            | 54.9 | <0.0001              |
| Parental SES                 |                          |      |                  |      |                      |
| Low                          | 376                      | 43.4 | 1,455            | 53.9 | <0.0001              |
| Medium-low                   | 855                      | 55.5 | 4,187            | 69.5 | <0.0001              |
| Medium-high                  | 751                      | 64.8 | 5,358            | 81.3 | <0.0001              |
| High                         | 247                      | 69.6 | 2,848            | 88.5 | <0.0001              |
| Maternal education           |                          |      |                  |      |                      |
| Compulsory school            | 755                      | 47.7 | 3,474            | 61.9 | <0.0001              |
| Upper secondary school       | 945                      | 61.3 | 5,582            | 77.9 | <0.0001              |
| University degree            | 506                      | 69.3 | 4,589            | 85.3 | <0.0001              |
| Paternal education           |                          |      |                  |      |                      |
| Compulsory school            | 639                      | 50.2 | 2,775            | 63.0 | <0.0001              |
| Upper secondary school       | 1,132                    | 59.9 | 7,085            | 77.9 | <0.0001              |
| University degree            | 318                      | 66.0 | 3,333            | 85.2 | <0.0001              |
| Maternal income              |                          |      |                  |      |                      |
| Q1                           | 614                      | 52.3 | 3,327            | 68.1 | <0.0001              |
| Q2                           | 750                      | 58.6 | 4,391            | 75.2 | <0.0001              |
| Q3                           | 542                      | 58.2 | 3,534            | 77.1 | <0.0001              |
| Q4                           | 304                      | 62.6 | 2,429            | 81.3 | <0.0001              |
| Paternal income              |                          |      |                  |      |                      |
| Q1                           | 556                      | 49.3 | 2,453            | 62.6 | <0.0001              |
| Q2                           | 410                      | 54.0 | 2,260            | 72.3 | <0.0001              |
| Q3                           | 549                      | 61.8 | 3,404            | 77.6 | <0.0001              |
| Q4                           | 572                      | 66.2 | 5,056            | 84.5 | <0.0001              |
| Maternal occupational status |                          |      |                  |      |                      |
| No occupation                | 438                      | 47.8 | 1,722            | 58.3 | <0.0001              |
| Occupation                   | 1,777                    | 60.0 | 12,005           | 77.9 | <0.0001              |
| Paternal occupational status |                          |      |                  |      |                      |
| No occupation                | 363                      | 45.4 | 1,543            | 58.7 | <0.0001              |
| Occupation                   | 1,736                    | 60.5 | 11,703           | 78.5 | <0.0001              |

Abbreviations: SES, socioeconomic status; Q, quartile. <sup>¶</sup>Performed with chi-square.

1 EUR  $\approx$  9.83 SEK December 31<sup>st</sup> 2017. Q1: <18,652 EUR; Q2: 18,652 to 25,025 EUR; Q3: 25,026 to 32,309 EUR; Q4: >32,309 EUR.



**S3 Table. Proportion of individuals who have undergone obesity treatment in childhood who completed  $\geq 12$  years of schooling by calendar year and by age at start of obesity treatment (n=3,942).**

| <b>Individuals completing <math>\geq 12</math> years of schooling</b> |          |          |
|-----------------------------------------------------------------------|----------|----------|
|                                                                       | <b>n</b> | <b>%</b> |
| Calendar year at start of obesity treatment                           |          |          |
| 1995-2001                                                             | 229      | 62.6     |
| 2002-2008                                                             | 1,262    | 58.1     |
| 2009-2014                                                             | 745      | 53.1     |
| Age at start of obesity treatment                                     |          |          |
| 10 - 12.99                                                            | 960      | 59.0     |
| 13 - 16.99                                                            | 1,276    | 55.1     |

STROBE Statement—Checklist of items that should be included in reports of *cohort studies*

|                              | Item No | Recommendation                                                                                                                                                                                                                                                                                                         | Page No     |
|------------------------------|---------|------------------------------------------------------------------------------------------------------------------------------------------------------------------------------------------------------------------------------------------------------------------------------------------------------------------------|-------------|
| <b>Title and abstract</b>    | 1       | (a) Indicate the study's design with a commonly used term in the title or the abstract<br>(b) Provide in the abstract an informative and balanced summary of what was done and what was found                                                                                                                          | 1-2<br>2-3  |
| <b>Introduction</b>          |         |                                                                                                                                                                                                                                                                                                                        |             |
| Background/rationale         | 2       | Explain the scientific background and rationale for the investigation being reported                                                                                                                                                                                                                                   | 4           |
| Objectives                   | 3       | State specific objectives, including any prespecified hypotheses                                                                                                                                                                                                                                                       | 4.5         |
| <b>Methods</b>               |         |                                                                                                                                                                                                                                                                                                                        |             |
| Study design                 | 4       | Present key elements of study design early in the paper                                                                                                                                                                                                                                                                | 5           |
| Setting                      | 5       | Describe the setting, locations, and relevant dates, including periods of recruitment, exposure, follow-up, and data collection                                                                                                                                                                                        | 5-9         |
| Participants                 | 6       | (a) Give the eligibility criteria, and the sources and methods of selection of participants. Describe methods of follow-up<br>(b) For matched studies, give matching criteria and number of exposed and unexposed                                                                                                      | 5<br>5      |
| Variables                    | 7       | Clearly define all outcomes, exposures, predictors, potential confounders, and effect modifiers. Give diagnostic criteria, if applicable                                                                                                                                                                               | 7-9         |
| Data sources/<br>measurement | 8*      | For each variable of interest, give sources of data and details of methods of assessment (measurement). Describe comparability of assessment methods if there is more than one group                                                                                                                                   | 7-9         |
| Bias                         | 9       | Describe any efforts to address potential sources of bias                                                                                                                                                                                                                                                              | 7-9         |
| Study size                   | 10      | Explain how the study size was arrived at                                                                                                                                                                                                                                                                              | 5           |
| Quantitative variables       | 11      | Explain how quantitative variables were handled in the analyses. If applicable, describe which groupings were chosen and why                                                                                                                                                                                           | 9-10        |
| Statistical methods          | 12      | (a) Describe all statistical methods, including those used to control for confounding<br>(b) Describe any methods used to examine subgroups and interactions<br>(c) Explain how missing data were addressed<br>(d) If applicable, explain how loss to follow-up was addressed<br>(e) Describe any sensitivity analyses | 9-10        |
| <b>Results</b>               |         |                                                                                                                                                                                                                                                                                                                        |             |
| Participants                 | 13*     | (a) Report numbers of individuals at each stage of study—eg numbers potentially eligible, examined for eligibility, confirmed eligible, included in the study, completing follow-up, and analysed<br>(b) Give reasons for non-participation at each stage<br>(c) Consider use of a flow diagram                        | 12 +<br>fig |
| Descriptive data             | 14*     | (a) Give characteristics of study participants (eg demographic, clinical, social) and information on exposures and potential confounders<br>(b) Indicate number of participants with missing data for each variable of interest<br>(c) Summarise follow-up time (eg, average and total amount)                         | 11          |
| Outcome data                 | 15*     | Report numbers of outcome events or summary measures over time                                                                                                                                                                                                                                                         | 12          |

|    |                          |    |                                                                                                                                                                                                              |       |
|----|--------------------------|----|--------------------------------------------------------------------------------------------------------------------------------------------------------------------------------------------------------------|-------|
| 1  | Main results             | 16 | (a) Give unadjusted estimates and, if applicable, confounder-adjusted estimates and their precision (eg, 95% confidence interval). Make clear which confounders were adjusted for and why they were included | 12-17 |
| 2  |                          |    | (b) Report category boundaries when continuous variables were categorized                                                                                                                                    |       |
| 3  |                          |    | (c) If relevant, consider translating estimates of relative risk into absolute risk for a meaningful time period                                                                                             |       |
| 4  |                          |    |                                                                                                                                                                                                              |       |
| 5  |                          |    |                                                                                                                                                                                                              |       |
| 6  |                          |    |                                                                                                                                                                                                              |       |
| 7  |                          |    |                                                                                                                                                                                                              |       |
| 8  |                          |    |                                                                                                                                                                                                              |       |
| 9  | Other analyses           | 17 | Report other analyses done—eg analyses of subgroups and interactions, and sensitivity analyses                                                                                                               | 12-17 |
| 10 |                          |    |                                                                                                                                                                                                              |       |
| 11 | <b>Discussion</b>        |    |                                                                                                                                                                                                              |       |
| 12 |                          |    |                                                                                                                                                                                                              |       |
| 13 | Key results              | 18 | Summarise key results with reference to study objectives                                                                                                                                                     | 18    |
| 14 | Limitations              | 19 | Discuss limitations of the study, taking into account sources of potential bias or imprecision. Discuss both direction and magnitude of any potential bias                                                   | 20-21 |
| 15 |                          |    |                                                                                                                                                                                                              |       |
| 16 | Interpretation           | 20 | Give a cautious overall interpretation of results considering objectives, limitations, multiplicity of analyses, results from similar studies, and other relevant evidence                                   | 18-21 |
| 17 |                          |    |                                                                                                                                                                                                              |       |
| 18 |                          |    |                                                                                                                                                                                                              |       |
| 19 | Generalisability         | 21 | Discuss the generalisability (external validity) of the study results                                                                                                                                        | 21    |
| 20 |                          |    |                                                                                                                                                                                                              |       |
| 21 | <b>Other information</b> |    |                                                                                                                                                                                                              |       |
| 22 | Funding                  | 22 | Give the source of funding and the role of the funders for the present study and, if applicable, for the original study on which the present article is based                                                | 22-23 |
| 23 |                          |    |                                                                                                                                                                                                              |       |
| 24 |                          |    |                                                                                                                                                                                                              |       |

\*Give information separately for exposed and unexposed groups.

**Note:** An Explanation and Elaboration article discusses each checklist item and gives methodological background and published examples of transparent reporting. The STROBE checklist is best used in conjunction with this article (freely available on the Web sites of PLoS Medicine at <http://www.plosmedicine.org/>, Annals of Internal Medicine at <http://www.annals.org/>, and Epidemiology at <http://www.epidem.com/>). Information on the STROBE Initiative is available at <http://www.strobe-statement.org>.

# BMJ Open

## Obesity in childhood, socioeconomic status, and completion of 12 or more school years: a prospective cohort study

|                                 |                                                                                                                                                                                                                                                                                                                                                                                                                                                                                                               |
|---------------------------------|---------------------------------------------------------------------------------------------------------------------------------------------------------------------------------------------------------------------------------------------------------------------------------------------------------------------------------------------------------------------------------------------------------------------------------------------------------------------------------------------------------------|
| Journal:                        | <i>BMJ Open</i>                                                                                                                                                                                                                                                                                                                                                                                                                                                                                               |
| Manuscript ID                   | bmjopen-2020-040432.R2                                                                                                                                                                                                                                                                                                                                                                                                                                                                                        |
| Article Type:                   | Original research                                                                                                                                                                                                                                                                                                                                                                                                                                                                                             |
| Date Submitted by the Author:   | 02-Dec-2020                                                                                                                                                                                                                                                                                                                                                                                                                                                                                                   |
| Complete List of Authors:       | Lindberg, Louise; Karolinska Institutet, Dept. Clinical Science, Intervention and Technology<br>Persson, Martina; Karolinska Institute, Department of Medicine, Clinical Epidemiology, Karolinska Institutet;<br>Danielsson, Pernilla; Karolinska Institutet, Dept. Clinical Science, Intervention and Technology<br>Hagman, Emilia; Karolinska Institutet, Dept. Clinical Science, Intervention and Technology<br>Marcus, Claude; Karolinska Institutet, Dept. Clinical Science, Intervention and Technology |
| <b>Primary Subject Heading</b>: | Paediatrics                                                                                                                                                                                                                                                                                                                                                                                                                                                                                                   |
| Secondary Subject Heading:      | Epidemiology, Nutrition and metabolism, Public health                                                                                                                                                                                                                                                                                                                                                                                                                                                         |
| Keywords:                       | Paediatric endocrinology < DIABETES & ENDOCRINOLOGY, EPIDEMIOLOGY, Paediatric endocrinology < PAEDIATRICS, PUBLIC HEALTH                                                                                                                                                                                                                                                                                                                                                                                      |
|                                 |                                                                                                                                                                                                                                                                                                                                                                                                                                                                                                               |

SCHOLARONE™  
Manuscripts

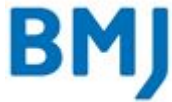

I, the Submitting Author has the right to grant and does grant on behalf of all authors of the Work (as defined in the below author licence), an exclusive licence and/or a non-exclusive licence for contributions from authors who are: i) UK Crown employees; ii) where BMJ has agreed a CC-BY licence shall apply, and/or iii) in accordance with the terms applicable for US Federal Government officers or employees acting as part of their official duties; on a worldwide, perpetual, irrevocable, royalty-free basis to BMJ Publishing Group Ltd ("BMJ") its licensees and where the relevant Journal is co-owned by BMJ to the co-owners of the Journal, to publish the Work in this journal and any other BMJ products and to exploit all rights, as set out in our [licence](#).

The Submitting Author accepts and understands that any supply made under these terms is made by BMJ to the Submitting Author unless you are acting as an employee on behalf of your employer or a postgraduate student of an affiliated institution which is paying any applicable article publishing charge ("APC") for Open Access articles. Where the Submitting Author wishes to make the Work available on an Open Access basis (and intends to pay the relevant APC), the terms of reuse of such Open Access shall be governed by a Creative Commons licence – details of these licences and which [Creative Commons](#) licence will apply to this Work are set out in our licence referred to above.

Other than as permitted in any relevant BMJ Author's Self Archiving Policies, I confirm this Work has not been accepted for publication elsewhere, is not being considered for publication elsewhere and does not duplicate material already published. I confirm all authors consent to publication of this Work and authorise the granting of this licence.

1  
2  
3  
4 1 Obesity in childhood, socioeconomic status, and completion of 12 or  
5  
6  
7 2 more school years: a prospective cohort study  
8  
9  
10 3

11 4 Louise Lindberg<sup>1</sup>, Martina Persson<sup>2,3,4</sup>, Pernilla Danielsson<sup>1</sup>, Emilia Hagman<sup>1\*</sup>, Claude  
12  
13  
14 5 Marcus<sup>1</sup>  
15  
16  
17 6

18  
19  
20 7 <sup>1</sup>Department of Clinical Science, Intervention and Technology, Division of Pediatrics,  
21 8 Karolinska Institutet, Stockholm, Sweden

22  
23 9 <sup>2</sup>Department of Medicine Solna, Clinical Epidemiology Unit, Karolinska Institutet,  
24 10 Stockholm, Sweden

25  
26 11 <sup>3</sup>Department of Diabetes and Endocrinology, Sachska Children's Hospital Södersjukhuset,  
27 12 Stockholm, Sweden

28  
29  
30 13 <sup>4</sup>Department of Clinical Science and Education, Södersjukhuset, Karolinska Institutet,  
31 14 Stockholm, Sweden

32  
33 15 \*Corresponding author e-mail: [emilia.hagman@ki.se](mailto:emilia.hagman@ki.se) (EH)  
34

35 16 Other contributing authors e-mail: [louise.lindberg@ki.se](mailto:louise.lindberg@ki.se); [martina.persson@ki.se](mailto:martina.persson@ki.se);  
36 17 [pernilla.danielsson.liljeqvist@ki.se](mailto:pernilla.danielsson.liljeqvist@ki.se); [claudio.marcus@ki.se](mailto:claudio.marcus@ki.se)  
37

38 18 Keywords: Pediatric obesity, schools, epidemiology, social class, cohort study  
39

40 19 Word count: 3963  
41  
42  
43  
44  
45  
46  
47  
48  
49  
50  
51  
52  
53  
54  
55  
56  
57  
58  
59  
60

## 20 Abstract

21 **Objectives:** Children with obesity achieve lower educational level compared with normal-  
22 weight peers. Parental socioeconomic status (SES) impacts both a child's academic  
23 achievement and risk of obesity. The degree to which the association between obesity and  
24 education depend on parental SES is unclear. Therefore, the primary aim is to investigate if  
25 individuals with obesity in childhood are less likely to complete  $\geq 12$  years of schooling,  
26 independently of parental SES. The secondary aim is to study how weight loss, level of  
27 education, and parental SES are associated.

28 **Design:** Nationwide prospective cohort study.

29 **Setting:** Swedish national register data.

30 **Participants:** Children aged 10-17 years, recorded in the Swedish Childhood Obesity  
31 Treatment Register (BORIS), and aged 20 years or older at follow-up were included  
32 (n=3,942). A comparison group was matched by sex, year of birth, and living area  
33 (n=18,728). Parental SES was based on maternal and paternal level of education, income,  
34 and occupational status.

35 **Primary outcome measure:** Completion of  $\geq 12$  years of schooling was analysed with  
36 conditional logistic regression, and adjusted for group, migration background, ADHD/ADD,  
37 anxiety/depression, and parental SES.

38 **Results:** Among those with obesity in childhood, 56.7% completed  $\geq 12$  school years  
39 compared with 74.4% in the comparison group (p<0.0001). High parental SES compared  
40 with low SES was strongly associated with attained level of education in both children with  
41 and without obesity, adjusted odds ratio (aOR) [99% confidence interval (CI)]=5.40 [4.45 to  
42 6.55]. However, obesity in childhood remains a strong risk factor of not completing  $\geq 12$

1  
2  
3 43 school years, independently of parental SES, <sup>a</sup>OR=0.57 [0.51 to 0.63]. Successful obesity  
4  
5 44 treatment increased the odds of completing  $\geq 12$  years in school even when taking parental  
6  
7  
8 45 SES into account, <sup>a</sup>OR=1.34 [1.04 to 1.72].  
9

10 46 **Conclusions:** Individuals with obesity in childhood have lower odds of completing  $\geq 12$   
11  
12 47 school years, independently of parental SES. Optimized obesity treatment may improve  
13  
14  
15 48 school results in this group.  
16

## 17 49

### 20 50 **Strengths and limitation of this study**

- 23 51 • In this prospective cohort study, we have been able to investigate the level of  
24  
25 52 education among a large number of individuals who have obesity in childhood (n=  
26  
27  
28 53 3,942) in comparison with a matched group (n=18,728).  
29
- 30 54 • The study design of using longitudinal data from several national registers provided  
31  
32 55 the opportunity to control for important confounding factors, such as neuropsychiatric  
33  
34  
35 56 disorders, anxiety, depression, and family socioeconomic status.  
36
- 37 57 • Factors such as free education, school lunches, and students' health care may have an  
38  
39 58 impact on the generalizability of our data to other populations.  
40  
41

42 59  
43  
44  
45  
46  
47  
48  
49  
50  
51  
52  
53  
54  
55  
56  
57  
58  
59  
60



## 60 Introduction

61 During the last 40 years, the prevalence of childhood obesity has increased exponentially in  
62 many parts of the world.<sup>1</sup> Childhood obesity is associated with increased risks of somatic  
63 morbidity and risk of premature death in adulthood.<sup>2-5</sup> Psychosocial maladjustment, anxiety  
64 and depression are also prevalent<sup>6 7</sup> and may contribute to the obesity-related long-term  
65 morbidity and mortality.<sup>5</sup> Most studies report that children with obesity more often have  
66 lower school grades and reach a lower level of education compared with normal-weight  
67 peers,<sup>8-10</sup> but in a recent study, only girls with obesity were affected.<sup>11</sup> We have previously  
68 confirmed the association between obesity and lower attained level of education among both  
69 girls and boys.<sup>9</sup> We also found that successful obesity treatment was positively correlated  
70 with completing  $\geq 12$  school years, although without taking socioeconomic status (SES) into  
71 account.<sup>9</sup>

72 Low parental SES is a well-established risk factor for both childhood obesity and poorer  
73 academic achievement.<sup>12</sup> In particular, parental education has been demonstrated to influence  
74 the child's performance at school.<sup>13-15</sup> In addition, depression<sup>16</sup> and neuropsychiatric  
75 disorders, including Attention Deficit Disorder with or without Hyperactivity  
76 (ADHD/ADD),<sup>17</sup> may adversely affect school results. Depression and neuropsychiatric  
77 disorders are more common in children with obesity compared to the general population.<sup>9 18</sup>  
78 Investigating the impact of obesity alone on attained level of education requires that these  
79 and other confounders are considered. The primary aim of this study was to disentangle the  
80 association of childhood obesity and parental SES on completed level of education. The

1  
2  
3 81 secondary aim was to study if positive effects of weight loss on attained level of education is  
4  
5 82 affected by parental SES.  
6  
7

## 8 83 **Methods**

### 9 84 **Study population**

10  
11  
12  
13  
14  
15  
16 85 This prospective cohort study included children with obesity,<sup>19</sup> aged 10-17 years at the start  
17  
18 86 of obesity treatment (December 1994 to December 2015), and aged 20 years or older and  
19  
20  
21 87 living in Sweden at follow-up (December 31<sup>st</sup> 2017; n=3,942). Data on subjects receiving  
22  
23 88 treatment for childhood obesity was collected from the Swedish Childhood Obesity  
24  
25 89 Treatment Register (BORIS). BORIS has been thoroughly described elsewhere,<sup>20</sup> but in  
26  
27  
28 90 short: The main purpose of the register is quality assessment and long-term evaluation of  
29  
30 91 childhood obesity treatment. Treatment is individualized and consists primarily of lifestyle  
31  
32 92 modification (i.e. diet and physical activity).  
33  
34

35 93 A comparison group from the general population was randomly identified using the Swedish  
36  
37 94 Total Population Register and matched by sex, year of birth, and living area at the year  
38  
39 95 obesity treatment was initiated (n=18,728). Using density matching without replacement,  
40  
41 96 five individuals were matched to each individual from the childhood obesity cohort. Siblings  
42  
43 97 of children registered in the childhood obesity cohort were excluded from the comparison  
44  
45 98 group. Children with a diagnosis of mental retardation or genetic syndromes were excluded  
46  
47  
48 99 from both the childhood obesity cohort and the comparison group (Fig 1 and S1 Table).  
49  
50

51  
52 100  
53  
54  
55  
56  
57  
58  
59  
60

1  
2  
3 101 Families were informed in written or verbal about data collection in the Swedish Childhood  
4  
5 102 Obesity Treatment Register. Post an opt-out approval by parents/guardians, data of the  
6  
7 103 children's weight and height were recorded by the local health care provider during treatment  
8  
9 104 visits. There was no data of weight and height of individuals in the comparison group.  
10  
11 105 However, less than 1% of the individuals in the comparison group were found in the National  
12  
13 106 Patient Register with a diagnosis of obesity in childhood. In Sweden, health care is free of  
14  
15 107 charge for children and adolescents until 18 years of age. The study was approved by the  
16  
17 108 regional Ethics Committee in Stockholm, Sweden (No. 2016/922-31/1).

## 109 **Data sources**

110 Using the Swedish identity number, which is unique to each resident in Sweden, data from  
111 several national registers were linked.<sup>21</sup> Data on education, income, and occupational status  
112 were obtained from the Longitudinal Integration Database for Health Insurance and Labour  
113 Market Studies. Information on migration background for children and their parents was  
114 obtained from the Swedish Total Population Register.<sup>22</sup> Both these registers are held by  
115 Statistics Sweden, a governmental agency that collects and provide official statistics  
116 ([www.scb.se/en](http://www.scb.se/en)).

117 Data on diagnoses of mental retardation, genetic syndromes, ADHD/ADD, anxiety, and  
118 depression were identified based on codes according the International Classification of  
119 Diseases (10<sup>th</sup> revision; S1 Table) and retrieved from the National Patient Register.<sup>23</sup>  
120 Information on prescriptions of psychostimulant drugs for ADHD/ADD as well as  
121 antidepressants and tranquilizers for anxiety and depression were identified using the  
122 Anatomical Therapeutic Chemical classification system (S1 Table) retrieved from the

1  
2  
3 123 Swedish Prescribed Drug Register.<sup>24</sup> Data on deaths were retrieved from the Cause of Death  
4  
5 124 Register.<sup>25</sup> These registers are held and were linked by the governmental agency the National  
6  
7  
8 125 Board of Health and Welfare ([www.socialstyrelsen.se/english](http://www.socialstyrelsen.se/english)).

## 11 126 **Definition of outcome**

12  
13  
14 127 The main outcome was defined as completion of  $\geq 12$  years of schooling, and based on the  
15  
16 128 International Standard Classification of Education.<sup>26</sup> In Sweden, children start school at the  
17  
18  
19 129 age of 6 or 7 years and attend compulsory school for 9 years. Upper secondary school  
20  
21 130 includes three additional years of schooling and provides the requirements to attend higher  
22  
23 131 education. Usually students graduate from upper secondary school at 18 or 19 years of age.  
24  
25  
26 132 All education in Sweden is free of charge. Students in compulsory and upper secondary  
27  
28 133 school are provided school lunches and health care at schools, also free of charge.

## 31 134 **Definition of exposure variables**

32  
33  
34  
35 135 Degree of obesity in children from BORIS was assessed with Body Mass Index Standard  
36  
37 136 Deviation Score (BMI SDS), which is standardized by sex and age and used to measure  
38  
39 137 degree of obesity in growing children.<sup>19</sup> Baseline measures (continuous) were used for the  
40  
41  
42 138 variable BMI SDS at start of treatment. Response to obesity treatment was based on the  
43  
44 139 change of BMI SDS from the first to the last clinical visit and categorized into four groups:<sup>3</sup>  
45  
46 140 <sup>27</sup> good response, a reduction of BMI SDS by 0.25 units or more; no response, a change of  
47  
48 141 BMI SDS by +/- 0.24 units; poor response, an increase of BMI SDS by 0.25 units or more;  
49  
50  
51 142 and dropouts, children with less than one year between their first and last measure or without  
52  
53 143 clinical follow-up after their first registered visit.

1  
2  
3 144 Parental SES was based on maternal and paternal level of education, income, and  
4  
5 145 occupational status at the year the child turned 15 years, which is about the same time as the  
6  
7 146 child starts upper secondary school. In case of the child was adopted, the SES of adoptive  
8  
9  
10 147 parents was used (childhood obesity cohort n=24 and comparison group n=164). The  
11  
12 148 rationale of treating SES as a composite variable was to capture more of the social context  
13  
14  
15 149 and a potential inequality embedded there. Thus, by taking three variables into account  
16  
17 150 instead of one, we get a more wide and robust measure of SES. Maternal and paternal  
18  
19 151 educational level was categorized into compulsory school, upper secondary school, or  
20  
21 152 university degree. Annual disposable income was used to reflect maternal and paternal  
22  
23 153 economic capacity. The annual disposable income includes all taxable (direct labour income,  
24  
25 154 capital gains from shares etc.) and tax-free income (housing and child benefits, student aid  
26  
27 155 etc.), minus final tax and other negative transfers such as capital loss from shares and  
28  
29  
30 156 properties. Disposable income from different years was converted to 2017 prices using the  
31  
32  
33 157 Consumer Price Index for Sweden provided by Statistics Sweden ([www.scb.se/en](http://www.scb.se/en)). Income  
34  
35 158 was categorized into quartiles based on data from the parents in the comparison group. No  
36  
37 159 occupation was defined as either unemployment 6 months or more, or income from long-  
38  
39 160 term sick leave exceeding any income from the individual's gross salary. Individuals  
40  
41  
42 161 considered to have an occupation included those registered as employed or having an income  
43  
44 162 from student grants/loan equivalent to full-time studies for at least one semester. Parental  
45  
46  
47 163 SES was weighted according to maternal and paternal education (0, 1, 2), income (0, 1, 2, 3),  
48  
49 164 and occupational status (0, 1). The mean parental SES score (i.e. the sum of the mother's and  
50  
51 165 father's all SES indicators divided by two) was applied to their child. The SES-variable was  
52  
53  
54  
55  
56  
57  
58  
59  
60

1  
2  
3 166 categorized into four levels; low SES (0 to 1.5 points), medium-low SES (2 to 3 points),  
4  
5 167 medium-high SES (3.5 to 4.5 points), and high SES (5 to 6 points).  
6  
7

8 168 The prevalence of both ADHD/ADD<sup>9</sup> and depression<sup>18</sup> is higher in children with obesity and  
9  
10 169 may negatively influence attained level of education.<sup>9 16 17</sup> ADHD/ADD and  
11  
12 170 anxiety/depression in children were identified based on diagnosis or dispensed prescribed  
13  
14 171 medication (S1 Table).  
15  
16  
17

## 18 172 **Definition of covariates**

19  
20  
21  
22 173 The migration background of children in Sweden may impact school achievements and is  
23  
24 174 therefore an important factor to control for in the analyses.<sup>9 14</sup> Migration background was  
25  
26 175 categorized as Nordic or non-Nordic. Nordic was defined as born in a Nordic country  
27  
28 176 (Sweden, Norway, Denmark, Finland, or Iceland) with one or two parents born in the Nordic.  
29  
30 177 Children were classified as non-Nordic if born outside the Nordic or born in the Nordic with  
31  
32 178 two parents born outside the Nordic. Other covariates included sex and age (continuous) at  
33  
34 179 start of obesity treatment.  
35  
36  
37  
38

## 39 180 **Patient and public involvement**

40  
41  
42 181 No patient involved.  
43  
44  
45  
46 182

## 49 183 **Statistical analysis**

50  
51  
52  
53 184 Descriptive statistics are presented as means and confidence intervals (CI), medians and  
54  
55 185 interquartile ranges (IQR), or frequencies and percentages. Conditional logistic regression  
56  
57

1  
2  
3 186 was used to calculate odds ratios (OR's) with 99% CI for the main outcome, i.e. completing  
4  
5 187  $\geq 12$  school years. Conditional logistic regression was used above ordinary logistic regression  
6  
7 188 as the childhood obesity cohort and the comparison group were matched by several variables.  
8  
9  
10 189 Independent variables included in the adjusted analyses were migration background,  
11  
12 190 ADHD/ADD, anxiety/depression, parental SES, and group (childhood obesity cohort or  
13  
14 191 comparison group) in analyses including both groups, otherwise stratified by group.  
15  
16  
17 192 Interaction between childhood obesity and parental SES was tested. The association of each  
18  
19 193 SES indicator on the odds of completing  $\geq 12$  school years was also analysed separately for  
20  
21 194 mothers and fathers. Sensitivity analyses excluding individuals with a non-Swedish  
22  
23 195 background (defined as child born in Sweden with at least one parent also born in Sweden),  
24  
25  
26 196 or ADHD/ADD, or anxiety/depression were performed.  
27  
28

29 197 Secondary analyses were performed within the childhood obesity cohort to examine  
30  
31 198 associations between patient characteristics and completed educational level. In ordinary  
32  
33 199 logistic regressions, odds were adjusted for sex, migration background, parental SES, age  
34  
35 200 and BMI SDS at start of treatment, treatment response, ADHD/ADD, and  
36  
37 201 anxiety/depression. We tested for possible interaction between parental SES and treatment  
38  
39 202 response for the odds of completing  $\geq 12$  years of schooling.  
40  
41  
42  
43

44 203 As missing data on parental SES was rare in both groups (Table 1), records with missing data  
45  
46 204 were excluded from the analyses, i.e. data were not imputed. P-values  $< 0.01$  were considered  
47  
48 205 statistically significant. All analyses were performed using SAS statistical software (version  
49  
50 206 9.4, Cary, NC, USA).  
51  
52

53 207  
54  
55  
56  
57  
58  
59  
60

208

**Table 1. Characteristics of the participants (n=22,670)**

|                                 | Childhood obesity cohort<br>(n=3,942) |            | Comparison group<br>(n=18,728) |            |
|---------------------------------|---------------------------------------|------------|--------------------------------|------------|
|                                 | n                                     | %          | n                              | %          |
| Female sex                      | 1,825                                 | 46.3       | 8,701                          | 46.5       |
| Nordic                          | 2,905                                 | 73.7       | 14,048                         | 75.0       |
| Age at end of follow-up (years) | 23.4*                                 | 21.4-26.3* | 23.4*                          | 21.5-26.3* |
| ADHD/ADD                        | 617                                   | 15.7       | 1,044                          | 5.6        |
| Anxiety/Depression              | 831                                   | 21.1       | 2,158                          | 11.5       |
| Parental SES                    |                                       |            |                                |            |
| Low                             | 867                                   | 22.0       | 2,700                          | 14.4       |
| Medium-low                      | 1,540                                 | 39.1       | 6,023                          | 32.1       |
| Medium-high                     | 1,159                                 | 29.4       | 6,587                          | 35.2       |
| High                            | 355                                   | 9.0        | 3,218                          | 17.2       |
| Missing                         | 21                                    | 0.5        | 200                            | 1.1        |
| Maternal education              |                                       |            |                                |            |
| Compulsory school               | 1,582                                 | 40.1       | 5,615                          | 30.0       |
| Upper secondary school          | 1,541                                 | 39.1       | 7,167                          | 38.3       |
| University degree               | 730                                   | 18.5       | 5,383                          | 28.7       |
| Missing                         | 89                                    | 2.3        | 563                            | 3.0        |
| Paternal education              |                                       |            |                                |            |
| Compulsory school               | 1,273                                 | 32.3       | 4,402                          | 23.5       |
| Upper secondary school          | 1,890                                 | 48.0       | 9,095                          | 48.6       |
| University degree               | 482                                   | 12.2       | 3,912                          | 20.9       |
| Missing                         | 297                                   | 7.5        | 1,319                          | 7.0        |
| Maternal income                 |                                       |            |                                |            |
| Q1                              | 1,173                                 | 29.8       | 4,887                          | 26.1       |
| Q2                              | 1,281                                 | 32.5       | 5,843                          | 31.2       |
| Q3                              | 931                                   | 23.6       | 4,585                          | 24.5       |
| Q4                              | 486                                   | 12.3       | 2,988                          | 15.9       |
| Missing                         | 71                                    | 1.8        | 425                            | 2.3        |
| Paternal income                 |                                       |            |                                |            |
| Q1                              | 1,127                                 | 28.6       | 3,917                          | 20.9       |
| Q2                              | 760                                   | 19.3       | 3,128                          | 16.7       |
| Q3                              | 889                                   | 22.5       | 4,389                          | 23.4       |
| Q4                              | 864                                   | 21.9       | 5,986                          | 32.0       |
| Missing                         | 302                                   | 7.7        | 1,308                          | 7.0        |
| Maternal occupational status    |                                       |            |                                |            |
| Occupation                      | 2,963                                 | 75.2       | 15,405                         | 82.2       |
| No occupation                   | 916                                   | 23.2       | 2,956                          | 15.8       |
| Missing                         | 63                                    | 1.6        | 367                            | 2.0        |
| Paternal occupational status    |                                       |            |                                |            |
| Occupation                      | 2,868                                 | 72.8       | 14,906                         | 79.6       |
| No occupation                   | 800                                   | 20.3       | 2,627                          | 14.0       |
| Missing                         | 274                                   | 6.9        | 1,195                          | 6.4        |

Data are n % if not else stated. Abbreviation: SES, socioeconomic status; Q, quartile.

\*Median with interquartile ranges

209

210



## 211 **Results**

212 In total, 3,942 individuals in the childhood obesity cohort and 18,728 individuals in the  
213 comparison group were included in the study (Table 1). In both groups, 46% of the  
214 participants were girls and the median age at follow-up was 23.4 years. The proportions of  
215 individuals of Nordic origin were similar in both groups (73.7% vs. 75.0%;  $p=0.02$ ). Despite  
216 the groups being matched for living area, a greater proportion of children with obesity grew  
217 up in households with low SES compared with the comparison group (22.0% vs. 14.4%;  
218  $p<0.0001$ ).

## 219 **Parental SES, childhood obesity and the child's attained level of** 220 **education**

221 In the childhood obesity cohort, 56.7% completed  $\geq 12$  years in school, compared with 74.4%  
222 in the comparison group. Girls more frequently completed  $\geq 12$  years of schooling than boys  
223 in both groups (S2 Table).

224 Higher parental SES was positively associated with completion of  $\geq 12$  years of schooling in  
225 both the childhood obesity cohort and in the comparison group (Fig 2). The odds were more  
226 than five times higher among children growing up in high SES households compared with  
227 those growing up in low SES households (Table 2). However, even when taking parental  
228 SES and other risk factors into account, individuals in the childhood obesity cohort were  
229 almost half as likely to complete  $\geq 12$  school years compared with those in the comparison  
230 group (Table 2). The adjusted odds ratio (<sup>a</sup>OR) [99% CI] to complete  $\geq 12$  years of schooling  
231 stratified by parental SES, when comparing the childhood obesity cohort with the comparison

1  
2  
3 232 group, showed a trend towards lower OR in the higher level of SES: low parental SES = 0.69  
4  
5 233 [0.50 to 0.95],  $p=0.0026$ ; medium-low parental SES = 0.59 [0.48 to 0.72],  $p<0.0001$ ;  
6  
7 234 medium-high parental SES = 0.46 [0.35 to 0.60],  $p<0.0001$ ; high parental SES = 0.27 [0.14  
8  
9  
10 235 to 0.54],  $p<0.0001$ . P-value for interaction test for childhood obesity and parental SES  
11  
12 236 reaches a  $p$  of 0.0015.

13  
14  
15 237 The association of parental SES on school performance was more pronounced in the  
16  
17 238 comparison group than in the childhood obesity cohort (S3 Table). For example, stratified  
18  
19 239 analyses show that adjusted OR of completing  $\geq 12$  years in school in low SES compared  
20  
21 240 with high SES in the comparison group was 0.17 (99% CI 0.14 to 0.21,  $p<0.0001$ ) and in the  
22  
23 241 childhood obesity cohort 0.31 (99% CI 0.22 to 0.45,  $p<0.0001$ ). Regardless of how we divide  
24  
25 242 the childhood obesity population (into age- or calendar year at start of obesity treatment, SES  
26  
27 243 sub-scores), large differences between the two groups remain (Table 2 and S4 Table).

28  
29  
30  
31  
32 244  
33  
34  
35  
36  
37  
38  
39  
40  
41  
42  
43  
44  
45  
46  
47  
48  
49  
50  
51  
52  
53  
54  
55  
56  
57  
58  
59  
60

**Table 2. Crude and adjusted odds ratio (99% CI); p-value of subjects completing ≥12 years of schooling**

|                                               | Crude estimates              | Model 1, n=22 449            | Model 2, n=20 610            | Model 3, n=20 691            | Model 4, n=20 885            | Model 5, n=20 420            |
|-----------------------------------------------|------------------------------|------------------------------|------------------------------|------------------------------|------------------------------|------------------------------|
| Childhood obesity cohort vs. comparison group | 0.44 (0.40 to 0.48); <0.0001 | 0.57 (0.51 to 0.63); <0.0001 | 0.55 (0.50 to 0.62); <0.0001 | 0.54 (0.48 to 0.61); <0.0001 | 0.53 (0.48 to 0.59); <0.0001 | 0.59 (0.52 to 0.66); <0.0001 |
| Non-Nordic vs. Nordic                         | 0.70 (0.63 to 0.78); <0.0001 | 0.85 (0.75 to 0.97); 0.001   | 0.77 (0.67 to 0.88); <0.0001 | 0.87 (0.76 to 0.99); 0.0068  | 0.81 (0.71 to 0.92); <0.0001 | 0.97 (0.84 to 1.12); 0.5687  |
| ADHD/ADD vs. non-ADHD/ADD                     | 0.19 (0.17 to 0.23); <0.0001 | 0.28 (0.24 to 0.33); <0.0001 | 0.27 (0.22 to 0.33); <0.0001 | 0.27 (0.22 to 0.32); <0.0001 | 0.26 (0.22 to 0.31); <0.0001 | 0.28 (0.23 to 0.34); <0.0001 |
| Anxiety/depression vs. no anxiety/depression  | 0.31 (0.27 to 0.35); <0.0001 | 0.39 (0.34 to 0.45); <0.0001 | 0.36 (0.31 to 0.41); <0.0001 | 0.38 (0.33 to 0.44); <0.0001 | 0.39 (0.33 to 0.44); <0.0001 | 0.36 (0.31 to 0.42); <0.0001 |
| Parental SES                                  |                              |                              |                              |                              |                              |                              |
| Medium-low vs. low parental SES               | 1.74 (1.54 to 1.97); <0.0001 | 1.69 (1.48 to 1.93); <0.0001 |                              |                              |                              |                              |
| Medium-high vs. low parental SES              | 3.33 (2.92 to 3.81); <0.0001 | 2.99 (2.59 to 3.45); <0.0001 |                              |                              |                              |                              |
| High vs. low parental SES                     | 6.21 (5.19 to 7.44); <0.0001 | 5.40 (4.45 to 6.55); <0.0001 |                              |                              |                              |                              |
| Maternal education                            |                              |                              |                              |                              |                              |                              |
| Upper secondary school vs. compulsory school  | 1.88 (1.69 to 2.08); <0.0001 |                              | 1.63 (1.45 to 1.83); <0.0001 |                              |                              | 1.51 (1.34 to 1.71); <0.0001 |
| University degree vs. compulsory school       | 3.23 (2.86 to 3.66); <0.0001 |                              | 2.45 (2.12 to 2.83); <0.0001 |                              |                              | 2.17 (1.87 to 2.53); <0.0001 |
| Paternal education                            |                              |                              |                              |                              |                              |                              |
| Upper secondary school vs. compulsory school  | 1.88 (1.69 to 2.09); <0.0001 |                              | 1.58 (1.40 to 1.77); <0.0001 |                              |                              | 1.42 (1.26 to 1.60); <0.0001 |
| University degree vs. compulsory school       | 3.07 (2.66 to 3.55); <0.0001 |                              | 2.09 (1.77 to 2.45); <0.0001 |                              |                              | 1.81 (1.53 to 2.15); <0.0001 |
| Maternal income                               |                              |                              |                              |                              |                              |                              |
| Q2 vs. Q1                                     | 1.28 (1.15 to 1.43); <0.0001 |                              |                              | 1.25 (1.10 to 1.41); <0.0001 |                              | 1.07 (0.93 to 1.23); 0.2065  |
| Q3 vs. Q1                                     | 1.45 (1.28 to 1.63); <0.0001 |                              |                              | 1.35 (1.17 to 1.55); <0.0001 |                              | 1.05 (0.90 to 1.23); 0.4224  |
| Q4 vs. Q1                                     | 1.86 (1.60 to 2.15); <0.0001 |                              |                              | 1.52 (1.28 to 1.81); <0.0001 |                              | 1.07 (0.88 to 1.28); 0.3831  |
| Paternal income                               |                              |                              |                              |                              |                              |                              |
| Q2 vs. Q1                                     | 1.36 (1.19 to 1.55); <0.0001 |                              |                              | 1.31 (1.13 to 1.51); <0.0001 |                              | 1.07 (0.91 to 1.26); 0.2740  |
| Q3 vs. Q1                                     | 1.90 (1.67 to 2.17); <0.0001 |                              |                              | 1.70 (1.48 to 1.96); <0.0001 |                              | 1.24 (1.05 to 1.46); 0.0009  |
| Q4 vs. Q1                                     | 2.95 (2.58 to 3.36); <0.0001 |                              |                              | 2.47 (2.13 to 2.86); <0.0001 |                              | 1.58 (1.33 to 1.88); <0.0001 |
| Maternal occupational status                  |                              |                              |                              |                              |                              |                              |
| Occupation vs. no occupation                  | 2.15 (1.92 to 2.40); <0.0001 |                              |                              |                              | 1.72 (1.51 to 1.96); <0.0001 | 1.38 (1.19 to 1.61); <0.0001 |
| Paternal occupational status                  |                              |                              |                              |                              |                              |                              |
| Occupation vs. no occupation                  | 2.24 (1.99 to 2.52); <0.0001 |                              |                              |                              | 1.79 (1.57 to 2.04); <0.0001 | 1.41 (1.20 to 1.65); <0.0001 |

Abbreviations: CI, confidence interval; SES, socioeconomic status.

Model 1: Variables included were group (childhood obesity cohort vs. comparison group), migration background, ADHD/ADD, anxiety/depression, and parental SES

Model 2: Variables included were group, migration background, ADHD/ADD, anxiety/depression, maternal-, and paternal education

Model 3: Variables included were group, migration background, ADHD/ADD, anxiety/depression, maternal-, and paternal income

Model 4: Variables included were group, migration background, ADHD/ADD, anxiety/depression, maternal-, and paternal occupational status.

Model 5: Variables included were group, migration background, ADHD/ADD, anxiety/depression, maternal-, and paternal education, income, and occupational status.

1  
2  
3 246 Of note, having a non-Nordic-, compared to a Nordic background, was associated with  
4  
5 247 reduced odds to complete 12 or more years of schooling (Table 2). This was however not  
6  
7 248 observed in boys in the childhood obesity cohort ( $p=0.68$ ). Further, excluding individuals  
8  
9 249 with a non-Swedish background, or ADHD/ADD, or anxiety/depression in sensitivity  
10  
11 250 analyses, did not alter the association between childhood obesity and attained level of  
12  
13 251 education. For example, when excluding individuals with a non-Swedish background, the  
14  
15 252 <sup>a</sup>OR to complete  $\geq 12$  years in school for the obesity cohort vs. the comparison group was  
16  
17 253 0.55 [0.48 to 0.63],  $p < 0.0001$ .

## 22 254 **Degree of obesity and treatment response on completed**

### 23 255 **educational level in children with obesity**

24  
25  
26  
27  
28  
29 256 In the childhood obesity cohort, the mean age at start of treatment was 13.5 years (99% CI:  
30  
31 257 13.45 to 13.62) and the mean BMI SDS was +2.91 (99% CI: 2.89 to 2.92). The median  
32  
33 258 treatment duration was 2.83 years (IQR: 1.86 to 4.42) and the mean treatment response,  
34  
35 259 calculated using BMI SDS from the first to the last clinical visit, was -0.13 (99% CI: -0.15  
36  
37 260 to -0.10,  $n=2,709$ , 68.7%, dropouts excluded). At baseline, 50.7% had obesity and 49.3% had  
38  
39 261 morbid obesity. At last measured weight and height, 33.4% had obesity and 47.2% had  
40  
41 262 morbid obesity, while 19.4% of the children no longer had obesity (dropouts excluded).

42  
43  
44  
45  
46 263 A greater degree of obesity at start of treatment lowered the odds of completing  $\geq 12$  years of  
47  
48 264 schooling, <sup>a</sup>OR [99% CI] = 0.51 [0.40 to 0.64],  $p < 0.0001$ , per one unit increase in BMI SDS,  
49  
50 265 while age at start of obesity treatment did not influence the outcome (Table 3). Treatment  
51  
52 266 response was categorized as good response ( $n=847$ ), no response ( $n=1\ 315$ ), poor response  
53  
54 267 ( $n=547$ ), and dropouts ( $n=1,233$ ). Of those with good treatment response, 67% completed

1  
2  
3 268  $\geq 12$  years in school compared with 58%, 52%, and 50% in the groups with no or poor  
4  
5 269 response, and dropouts, respectively ( $p < 0.0001$ ). Within all SES groups, except for high SES,  
6  
7 270 greater treatment response resulted in higher odds of completing  $\geq 12$  years in school (Fig 3).  
8  
9 271 Dropouts were less likely to complete  $\geq 12$  years in school compared with non-responders  
10  
11 272 (Table 3) but this was not observed in the high SES group (Fig 3). Duration of treatment  
12  
13 273 differed between children with good and poor treatment response (3.5 vs. 4.0 years;  
14  
15 274  $p < 0.0001$ ). In the childhood obesity cohort, the association between parental SES and odds  
16  
17 275 of completing  $\geq 12$  years of schooling was not modified by treatment response ( $p = 0.603$ ).  
18  
19  
20  
21  
22  
23  
24  
25  
26  
27  
28  
29  
30  
31  
32  
33  
34  
35  
36  
37  
38  
39  
40  
41  
42  
43  
44  
45  
46  
47  
48  
49  
50  
51  
52  
53  
54  
55  
56  
57  
58  
59  
60

**Table 3. Crude and adjusted odds ratios of completing  $\geq 12$  years of schooling in the childhood obesity cohort**

|                                              | Odds ratio (99% CI) performed with ordinary logistic regression; p value |                              |                              |
|----------------------------------------------|--------------------------------------------------------------------------|------------------------------|------------------------------|
|                                              | Crude estimates                                                          | Model 1, n=3 921             | Model 2, n=3 575             |
| Sex (girls vs. boys)                         | 1.26 (1.06 to 1.48); 0.0004                                              | 1.30 (1.08 to 1.56); 0.0002  | 1.29 (1.06 to 1.56); 0.0008  |
| Migration background (non-Nordic vs. Nordic) | 0.78 (0.65 to 0.94); 0.0006                                              | 0.74 (0.60 to 0.91); 0.0002  | 0.69 (0.55 to 0.87); <0.0001 |
| ADHD/ADD (yes vs. no)                        | 0.31 (0.25 to 0.40); <0.0001                                             | 0.35 (0.27 to 0.45); <0.0001 | 0.33 (0.26 to 0.44); <0.0001 |
| Anxiety/depression (yes vs. no)              | 0.43 (0.35 to 0.53); <0.0001                                             | 0.45 (0.36 to 0.57); <0.0001 | 0.43 (0.34 to 0.55); <0.0001 |
| BMI SDS at start of treatment                | 0.47 (0.38 to 0.58); <0.0001                                             | 0.51 (0.40 to 0.64); <0.0001 | 0.48 (0.38 to 0.62); <0.0001 |
| Age at start of treatment                    | 0.96 (0.93 to 1.01); 0.0234                                              | 1.01 (0.96 to 1.06); 0.60    | 1.01 (0.96 to 1.06); 0.805   |
| Treatment response*                          |                                                                          |                              |                              |
| Good response vs. no response                | 1.46 (1.15 to 1.85); <0.0001                                             | 1.34 (1.04 to 1.72); 0.0031  | 1.28 (0.98 to 1.67); 0.0182  |
| Poor response vs. no response                | 0.78 (0.60 to 1.02); 0.0167                                              | 0.72 (0.54 to 0.96); 0.0028  | 0.71 (0.53 to 0.96); 0.003   |
| Dropouts vs. no response                     | 0.71 (0.58 to 0.87); <0.0001                                             | 0.69 (0.55 to 0.86); <0.0001 | 0.68 (0.54 to 0.87); <0.0001 |
| Parental SES                                 |                                                                          |                              |                              |
| Medium-low vs. low parental SES              | 1.63 (1.31 to 2.03); <0.0001                                             | 1.56 (1.24 to 1.98); <0.0001 |                              |
| Medium-high vs. low parental SES             | 2.40 (1.90 to 3.05); <0.0001                                             | 2.19 (1.69 to 2.83); <0.0001 |                              |
| High vs. low parental SES                    | 2.99 (2.11 to 4.22); <0.0001                                             | 2.83 (1.95 to 4.12); <0.0001 |                              |
| Maternal education                           |                                                                          |                              |                              |
| Upper secondary school vs. compulsory school | 1.74 (1.44 to 2.09); <0.0001                                             |                              | 1.57 (1.27 to 1.94); <0.0001 |
| University degree vs. compulsory school      | 2.47 (1.94 to 3.16); <0.0001                                             |                              | 2.23 (1.67 to 2.98); <0.0001 |
| Paternal education                           |                                                                          |                              |                              |
| Upper secondary school vs. compulsory school | 1.48 (1.23 to 1.79); <0.0001                                             |                              | 1.26 (1.03 to 1.55); 0.004   |
| University degree vs. compulsory school      | 1.92 (1.44 to 2.56); <0.0001                                             |                              | 1.41 (1.01 to 1.95); 0.0076  |

Abbreviations: CI, confidence interval; BMI SDS, BMI standard deviation score; SES, socioeconomic status.

\* Good response=decrease of BMI SDS  $\geq 0.25$  units; No response=BMI SDS +/- 0.24 units; Poor response=increase of BMI SDS  $\geq 0.25$  units; Dropouts=no follow-up measure or less than one year between their first and last measure.

Model 1: Variables included were sex, migration background, ADHD/ADD, anxiety/depression, BMI SDS- and age at start of treatment, treatment response, and parental SES.

Model 2: Variables included were sex, migration background, ADHD/ADD, anxiety/depression, BMI SDS- and age at start of treatment, treatment response, maternal-, and paternal education.

276

277

## 278 **Discussion**

279 In this prospective cohort study, we have compared level of education among individuals  
280 recorded in the Swedish Childhood Obesity Treatment Register, and a comparison group  
281 matched by sex, year of birth, and living area. Individuals in the childhood obesity cohort were  
282 half as likely to complete 12 or more years of schooling, independently of parental  
283 socioeconomic status (SES).

284 Among individuals from high SES families, those in the childhood obesity cohort were  
285 approximately one third as likely to complete  $\geq 12$  years of schooling as individuals from high  
286 SES families in the comparison group. Furthermore, our results indicate that parental SES was  
287 more important to complete  $\geq 12$  school years in the comparison group than in the childhood  
288 obesity cohort. An association between obesity and impaired academic achievements has been  
289 demonstrated before.<sup>8 9</sup> To which extent other psychosocial factors contribute to this finding  
290 has not been evaluated. It is well established that low parental SES,<sup>13-15</sup> immigrant background,<sup>9</sup>  
291 <sup>14</sup> ADHD/ADD,<sup>9 17</sup> and depression,<sup>9 14 16</sup> may negatively affect performance in school. These  
292 factors are also overrepresented in the paediatric population with obesity. In this study, we can  
293 confirm that low parental SES, neuropsychiatric disorders, and anxiety/depression are more  
294 common in children with obesity and contribute to the decreased odds of completing  $\geq 12$  school  
295 years. However, we found that obesity in childhood is a considerable risk factor for not  
296 completing  $\geq 12$  years of schooling even after taking these and other important risk factors into  
297 account.

## 298 **Obesity treatment outcome and educational level**

1  
2  
3 299 We identified a positive association between weight-loss during obesity treatment and  
4  
5 300 completed educational level, which confirms our previously reported data unadjusted for SES.<sup>9</sup>  
6  
7 301 Children with good treatment response, compared with those with no response, were more  
8  
9 302 likely to complete  $\geq 12$  school years in all SES groups. A decrease of 0.25 BMI SDS, that has  
10  
11 303 previously been shown to improve metabolic health,<sup>27</sup> we can now also show may have a  
12  
13 304 positive association on completing  $\geq 12$  years of schooling. However, the positive effects of  
14  
15 305 successful obesity treatment did not compensate for the observed SES differences on attained  
16  
17 306 level of education.

18  
19  
20  
21  
22 307 In Sweden, 12 years of schooling is not mandatory, but the long-term social effects are  
23  
24 308 considerable for those who fail. It has been estimated that 50% of those who fail to complete  
25  
26 309  $\geq 12$  school years face a situation of being left outside the society with poor psychosocial health  
27  
28 310 and large costs for the society.<sup>28</sup> Thus, it is possible that school failure will further worsen the  
29  
30 311 health perspective of adolescents with obesity.

## 312 **Potential mechanisms between obesity, weight loss, and school** 313 **performance**

314 Several parameters may interplay when measuring school completion, e.g. resourcefulness,  
315 intelligence, or ability to conform. Nevertheless, the mechanisms by which obesity influences  
316 school performance are unclear but are likely multifactorial and complex. Possible mechanisms  
317 may include psychosocial aspects such as stigma<sup>29</sup> and increased risk for anxiety and  
318 depression.<sup>7</sup> Physiological mechanisms may be mediated by anatomical changes such as  
319 atrophy of the frontal lobe and reduced hippocampal volume have been demonstrated in  
320 individuals with obesity.<sup>30</sup> Some of the reported cognitive dysfunctions in children and  
321 adolescents with obesity include slower response times when performing visuospatial attention  
322 tasks,<sup>31</sup> diminished executive functions, such as working memory,<sup>32</sup> and slower cognitive



1  
2  
3 323 performance speed.<sup>33</sup> In addition, obesity-related comorbidities such as insulin resistance,<sup>34</sup>  
4  
5 324 type 2 diabetes mellitus,<sup>35</sup> chronic low-grade inflammation,<sup>36</sup> and the metabolic syndrome<sup>37</sup>  
6  
7 325 have also been associated with impaired executive function, memory performance, attention,  
8  
9 326 and cognitive flexibility. A high fat diet in rodents demonstrated detrimental effects on memory  
10  
11 327 and executive functions.<sup>30</sup>  
12  
13  
14

15 328 At least some of these effects seem to be reversible, which may add to the positive associations  
16  
17 329 we observed of weight loss on school outcome. Weight loss may have a direct positive effect  
18  
19 330 on cognitive functions.<sup>38</sup> Extensive weight loss via bariatric surgery improves insulin sensitivity  
20  
21 331 and decreases systematic inflammation,<sup>39</sup> and it has been suggested that these factors affect  
22  
23 332 cognitive functions.<sup>40</sup>  
24  
25  
26

27 333 However, children with obesity are often stigmatized,<sup>41</sup> have a low self-esteem, and are exposed  
28  
29 334 to bullying and social exclusion.<sup>42</sup> All these factors have most likely a negative impact on school  
30  
31 335 performance. In contrast, a strong social network is most probably an important factor both for  
32  
33 336 good treatment response and achievement in school. An inverse association has been observed  
34  
35 337 between familial social support and child weight status.<sup>43</sup> The relationship between BMI and  
36  
37 338 school completion may also be biased from e.g. assortative mating and dynastic effects which  
38  
39 339 have shown to reduce causal effects.<sup>44</sup> There is also a suggested interplay between genetic  
40  
41 340 variants and environmental factors that may affect intelligence.<sup>45</sup> Thus, it is likely that both  
42  
43 341 negative social effects of obesity and obesity-related morbidity, as well as genetic factors,  
44  
45 342 contribute to the adverse association of childhood obesity on completed educational level.<sup>7 29 41</sup>  
46  
47  
48  
49

50 343 <sup>45</sup>  
51  
52

## 53 344 **Limitations**

54  
55  
56  
57 345 Using longitudinal data from several national registers provided an opportunity to assess the  
58  
59 346 impact of obesity on completed educational level, adjusted for several important confounders.  
60

1  
2  
3 347 Data on both exposure and outcome were prospectively collected and defined according to  
4  
5 348 standardized international classifications.<sup>19 26</sup>  
6  
7  
8 349 However, some important limitations should be recognized. We did not have anthropometric  
9  
10 350 data on children in the comparison group. There is no representative national data on children  
11  
12 351 with obesity in Sweden. As our comparison group includes children with obesity, although  
13  
14 352 likely less than 1% according to obesity diagnoses found in the National Patient Register, odds  
15  
16 353 of lower level of education associated with obesity might be underestimated. It is also important  
17  
18 354 to consider that children receiving obesity treatment may not be representative of all children  
19  
20 355 with obesity. It should further be noted that parental SES was based on data from one specific  
21  
22 356 year in the child's life and not over the child's entire adolescent lifetime, and that the SES  
23  
24 357 indicators used may not reflect the whole SES spectrum. After providing specific ORs for each  
25  
26 358 SES indicator (Table 2) we can hypothesize that additive, or perhaps synergistic effects, of  
27  
28 359 different SES indicators may affect the outcome. Nevertheless, the OR for the childhood obesity  
29  
30 360 cohort vs. comparison group remained within a narrow interval. This may indicate that there is  
31  
32 361 an overlap between the measured SES domains and/or that the effect of obesity is a robust  
33  
34 362 variable, independently of SES. In addition, the impact of anxiety and depression on educational  
35  
36 363 level may be underestimated since these conditions often are under-diagnosed. It is furthermore  
37  
38 364 plausible that controlling for anxiety and depression may lead to an underestimation of the  
39  
40 365 association found between obesity in childhood and completion of 12 or more school years,  
41  
42 366 since the variable may act as a modifier/mediator.<sup>7</sup> We urge the reader to bear in mind that  
43  
44 367 despite several possible mechanisms have been proposed, causal relationships of obesity and  
45  
46 368 the effect of treatment on the outcome remains to be established. Lastly, factors such as free  
47  
48 369 education, school lunches, and students' health care may have an impact on the generalizability  
49  
50 370 of our data to other populations.  
51  
52  
53  
54  
55  
56  
57  
58  
59

## 371 **Conclusion**

1  
2  
3 372 In this longitudinal, population-based study, individuals with obesity in childhood were less  
4  
5 373 likely to complete 12 or more years of schooling, compared with a group from the general  
6  
7 374 population. The odds associated with obesity remained significantly increased even after taking  
8  
9 375 parental SES and other important risk factors, such as ADHD, into consideration. The  
10  
11 376 underlying mechanisms are unclear but previous studies indicate that the effects of obesity on  
12  
13 377 school completion both involve psychosocial effects and cognitive functions.<sup>16 17 32</sup> The  
14  
15 378 negative impact of childhood obesity on educational level may partly be reversed by successful  
16  
17 379 obesity treatment in childhood. Results from this study underline effects of childhood obesity  
18  
19 380 on schooling. For the sake of an optimal educational environment, it is of great importance to  
20  
21 381 increase awareness both in schools and among decision makers to allocate resources for  
22  
23 382 potential extra support, e.g. reduce stigma and increase educational support.  
24  
25  
26  
27  
28

## 29 383 **Acknowledgements**

30  
31 384 The authors would like to thank all local health care professionals in Sweden working with  
32  
33 385 children and adolescents with obesity and their valuable work with BORIS, and the BORIS  
34  
35 386 steering committee for establishing and maintaining the register.  
36  
37  
38

## 39 387 **Author contributions**

40  
41 388 Conceptualization: Louise Lindberg, Pernilla Danielsson, Martina Persson, Claude Marcus,  
42  
43 389 Emilia Hagman.

44  
45 390 Data curation: Louise Lindberg.

46  
47 391 Formal analysis: Louise Lindberg, Emilia Hagman.

48  
49 392 Funding acquisition: Louise Lindberg, Claude Marcus, Emilia Hagman.

50  
51 393 Methodology: Louise Lindberg, Emilia Hagman.

52  
53 394 Project administration: Louise Lindberg, Emilia Hagman.

54  
55 395 Supervision: Martina Persson, Emilia Hagman, Pernilla Danielsson, Claude Marcus.

56  
57 396 Writing – original draft: Louise Lindberg.  
58  
59  
60

1  
2  
3 397 Writing – review & editing: Louise Lindberg, Pernilla Danielsson, Martina Persson, Claude  
4  
5 398 Marcus, Emilia Hagman.  
6  
7  
8 399

## 10 400 **Funding statement**

11 401 This study was supported by funds to LL by Crown Princess Lovisa's Foundation (2017-  
12  
13 402 00348), Samariten Foundation (2017-0305), the Stockholm FreeMason Foundation for  
14  
15 403 Children's Welfare, Sällskapet Barnavård, Anna-Lisa och Arne Gustafssons Foundation,  
16  
17 404 Solstickan Foundation and Sven Jerring Foundation. EH was supported by the Swedish Society  
18  
19 405 for Medical Research, Fredrik and Ingrid Thuring's Foundation (2017-00309) and Magnus  
20  
21 406 Bergvall Foundation (2017-02113), and CM by the Swedish Heart and Lung Foundation  
22  
23 407 (20150790).  
24  
25  
26  
27  
28

## 29 408 **Data Sharing statement**

30 409 The data that support the findings of this study contains sensitive information. Restrictions  
31  
32 410 therefore apply to the availability of these data, which were used under license for the current  
33  
34 411 study, and so are not publicly available. According to Swedish law and the General Data  
35  
36 412 Protection Regulation, the authors are not permitted to share the datasets used in this study with  
37  
38 413 third parties. Given that an ethical approval is obtained, any individual may apply for data from  
39  
40 414 Statistics Sweden via [information@scb.se](mailto:information@scb.se), the Swedish National Board of Health and Welfare  
41  
42 415 via [registerservice@socialstyrelsen.se](mailto:registerservice@socialstyrelsen.se), and the Swedish Childhood Obesity Treatment Register  
43  
44 416 via <http://www.e-boris.se/kontaktuppgifter/>.  
45  
46  
47  
48  
49

## 50 417 **Competing interests**

51 418 All authors have completed the ICMJE uniform disclosure form at  
52  
53 419 [www.icmje.org/coi\\_disclosure.pdf](http://www.icmje.org/coi_disclosure.pdf) and declare: no support from any organisation for the  
54  
55 420 submitted work; no financial relationships with any organisations that might have an interest in  
56  
57  
58  
59  
60

1  
2  
3  
4  
5  
6  
7  
8  
9  
10  
11  
12  
13  
14  
15  
16  
17  
18  
19  
20  
21  
22  
23  
24  
25  
26  
27  
28  
29  
30  
31  
32  
33  
34  
35  
36  
37  
38  
39  
40  
41  
42  
43  
44  
45  
46  
47  
48  
49  
50  
51  
52  
53  
54  
55  
56  
57  
58  
59  
60

421 the submitted work in the previous three years; no other relationships or activities that could  
422 appear to have influenced the submitted.

423

For peer review only

424 **References**

- 425 1. Abarca-Gómez L, Abdeen ZA, Hamid ZA, et al. Worldwide trends in body-mass index, underweight,  
426 overweight, and obesity from 1975 to 2016: a pooled analysis of 2416 population-based  
427 measurement studies in 128.9 million children, adolescents, and adults. *The Lancet* 2017 doi:  
428 10.1016/S0140-6736(17)32129-3
- 429 2. Hagman E, Danielsson P, Brandt L, et al. Association between impaired fasting glycaemia in  
430 pediatric obesity and type 2 diabetes in young adulthood. *Nutr Diabetes* 2016;6(8):e227. doi:  
431 10.1038/nutd.2016.34 [published Online First: 2016/08/23]
- 432 3. Hagman E, Danielsson P, Elimam A, et al. The effect of weight loss and weight gain on blood  
433 pressure in children and adolescents with obesity. *Int J Obes (Lond)* 2019;43(10):1988-94.  
434 doi: 10.1038/s41366-019-0384-2 [published Online First: 2019/06/04]
- 435 4. Lindberg L, Danielsson P, Persson M, et al. Association of childhood obesity with risk of early all-  
436 cause and cause-specific mortality: A Swedish prospective cohort study. *PLoS medicine*  
437 2020;17(3):e1003078. doi: 10.1371/journal.pmed.1003078 [published Online First:  
438 2020/03/19]
- 439 5. Reilly JJ, Kelly J. Long-term impact of overweight and obesity in childhood and adolescence on  
440 morbidity and premature mortality in adulthood: systematic review. *Int J Obes (Lond)*  
441 2011;35(7):891-8. doi: 10.1038/ijo.2010.222
- 442 6. Viner RM, Cole TJ. Adult socioeconomic, educational, social, and psychological outcomes of  
443 childhood obesity: a national birth cohort study. *BMJ* 2005;330(7504):1354. doi:  
444 10.1136/bmj.38453.422049.E0 [published Online First: 2005/05/20]
- 445 7. Lindberg L, Hagman E, Danielsson P, et al. Anxiety and depression in children and adolescents with  
446 obesity: a nationwide study in Sweden. *BMC medicine* 2020;18(1):30. doi: 10.1186/s12916-  
447 020-1498-z [published Online First: 2020/02/23]
- 448 8. Laitinen J, Power C, Ek E, et al. Unemployment and obesity among young adults in a northern  
449 Finland 1966 birth cohort. *International journal of obesity and related metabolic disorders :  
450 journal of the International Association for the Study of Obesity* 2002;26(10):1329-38. doi:  
451 10.1038/sj.ijo.0802134
- 452 9. Hagman E, Danielsson P, Brandt L, et al. Childhood Obesity, Obesity Treatment Outcome, and  
453 Achieved Education: A Prospective Cohort Study. *The Journal of adolescent health : official  
454 publication of the Society for Adolescent Medicine* 2017 doi:  
455 10.1016/j.jadohealth.2017.04.009 [published Online First: 2017/07/12]
- 456 10. Karnehed N, Rasmussen F, Hemmingsson T, et al. Obesity and attained education: cohort study of  
457 more than 700,000 Swedish men. *Obesity* 2006;14(8):1421-28.
- 458 11. French SA, Wall M, Corbeil T, et al. Obesity in Adolescence Predicts Lower Educational Attainment  
459 and Income in Adulthood: The Project EAT Longitudinal Study. *Obesity (Silver Spring)*  
460 2018;26(9):1467-73. doi: 10.1002/oby.22273 [published Online First: 2018/09/19]
- 461 12. Shrewsbury V, Wardle J. Socioeconomic status and adiposity in childhood: a systematic review of  
462 cross-sectional studies 1990-2005. *Obesity (Silver Spring)* 2008;16(2):275-84. doi:  
463 10.1038/oby.2007.35 [published Online First: 2008/02/02]
- 464 13. Koivusilta LK, West P, Saaristo VM, et al. From childhood socio-economic position to adult  
465 educational level - do health behaviours in adolescence matter? A longitudinal study. *BMC  
466 public health* 2013;13:711. doi: 10.1186/1471-2458-13-711
- 467 14. Kark M, Hjern A, Rasmussen F. Poor school performance is associated with a larger gain in body  
468 mass index during puberty. *Acta Paediatr* 2014;103(2):207-13. doi: 10.1111/apa.12471
- 469 15. DeGarmo DS, Forgatch MS, Martinez CR, Jr. Parenting of divorced mothers as a link between  
470 social status and boys' academic outcomes: unpacking the effects of socioeconomic status.  
471 *Child development* 1999;70(5):1231-45. [published Online First: 1999/11/05]

1  
2  
3  
4  
5  
6  
7  
8  
9  
10  
11  
12  
13  
14  
15  
16  
17  
18  
19  
20  
21  
22  
23  
24  
25  
26  
27  
28  
29  
30  
31  
32  
33  
34  
35  
36  
37  
38  
39  
40  
41  
42  
43  
44  
45  
46  
47  
48  
49  
50  
51  
52  
53  
54  
55  
56  
57  
58  
59  
60

- 472 16. Freeman A, Tyrovolas S, Koyanagi A, et al. The role of socio-economic status in depression: results  
473 from the COURAGE (aging survey in Europe). *BMC public health* 2016;16(1):1098. doi:  
474 10.1186/s12889-016-3638-0 [published Online First: 2016/10/21]
- 475 17. Scholtens S, Rydell AM, Yang-Wallentin F. ADHD symptoms, academic achievement, self-  
476 perception of academic competence and future orientation: a longitudinal study.  
477 *Scandinavian journal of psychology* 2013;54(3):205-12. doi: 10.1111/sjop.12042 [published  
478 Online First: 2013/03/21]
- 479 18. Quek YH, Tam WWS, Zhang MWB, et al. Exploring the association between childhood and  
480 adolescent obesity and depression: a meta-analysis. *Obesity reviews : an official journal of*  
481 *the International Association for the Study of Obesity* 2017;18(7):742-54. doi:  
482 10.1111/obr.12535 [published Online First: 2017/04/13]
- 483 19. Cole TJ, Lobstein T. Extended international (IOTF) body mass index cut-offs for thinness,  
484 overweight and obesity. *Pediatr Obes* 2012;7(4):284-94. doi: 10.1111/j.2047-  
485 6310.2012.00064.x
- 486 20. Hagman E, Danielsson P, Lindberg L, et al. Paediatric obesity treatment during 14 years in  
487 Sweden: Lessons from the Swedish Childhood Obesity Treatment Register-BORIS. *Pediatr*  
488 *Obes* 2020;15(7):e12626. doi: 10.1111/ijpo.12626 [published Online First: 2020/02/20]
- 489 21. Ludvigsson JF, Otterblad-Olausson P, Pettersson BU, et al. The Swedish personal identity number:  
490 possibilities and pitfalls in healthcare and medical research. *European journal of*  
491 *epidemiology* 2009;24(11):659-67. doi: 10.1007/s10654-009-9350-y
- 492 22. Ludvigsson JF, Almqvist C, Bonamy AK, et al. Registers of the Swedish total population and their  
493 use in medical research. *European journal of epidemiology* 2016;31(2):125-36. doi:  
494 10.1007/s10654-016-0117-y [published Online First: 2016/01/16]
- 495 23. Ludvigsson JF, Andersson E, Ekblom A, et al. External review and validation of the Swedish  
496 national inpatient register. *BMC public health* 2011;11:450. doi: 10.1186/1471-2458-11-450  
497 [published Online First: 2011/06/11]
- 498 24. Wallerstedt SM, Wettermark B, Hoffmann M. The First Decade with the Swedish Prescribed Drug  
499 Register - A Systematic Review of the Output in the Scientific Literature. *Basic & clinical*  
500 *pharmacology & toxicology* 2016;119(5):464-69. doi: 10.1111/bcpt.12613 [published Online  
501 First: 2016/04/27]
- 502 25. Brooke HL, Talback M, Hornblad J, et al. The Swedish cause of death register. *European journal of*  
503 *epidemiology* 2017;32(9):765-73. doi: 10.1007/s10654-017-0316-1 [published Online First:  
504 2017/10/07]
- 505 26. UNESCO. International standard classification of education: Isced 1997. Re-edition. Paris: UNESCO  
506 Institute for Statistics. 2011
- 507 27. Ford AL, Hunt LP, Cooper A, et al. What reduction in BMI SDS is required in obese adolescents to  
508 improve body composition and cardiometabolic health? *Archives of disease in childhood*  
509 2010;95(4):256-61. doi: 10.1136/adc.2009.165340 [published Online First: 2009/12/08]
- 510 28. Nilsson I, Wadeskog A. Utanförskapets Ekonomiska Sociotoper: Socioekonomisk analys på  
511 stadsdelsnivå inom ramen för Healthy Cities 2012
- 512 29. Finn KE, Seymour CM, Phillips AE. Weight bias and grading among middle and high school  
513 teachers. *Br J Educ Psychol* 2019 doi: 10.1111/bjep.12322 [published Online First:  
514 2019/10/28]
- 515 30. Nguyen JC, Killcross AS, Jenkins TA. Obesity and cognitive decline: role of inflammation and  
516 vascular changes. *Frontiers in neuroscience* 2014;8:375. doi: 10.3389/fnins.2014.00375  
517 [published Online First: 2014/12/06]
- 518 31. Tsai C-L, Chen F-C, Pan C-Y, et al. The neurocognitive performance of visuospatial attention in  
519 children with obesity. *Frontiers in psychology* 2016;7
- 520 32. Laurent JS, Watts R, Adise S, et al. Associations Among Body Mass Index, Cortical Thickness, and  
521 Executive Function in Children. *JAMA Pediatr* 2019 doi: 10.1001/jamapediatrics.2019.4708  
522 [published Online First: 2019/12/10]

- 1  
2  
3 523 33. Sweat V, Yates KF, Migliaccio R, et al. Obese adolescents show reduced cognitive processing  
4 524 speed compared with healthy weight peers. *Childhood Obesity* 2017  
5 525 34. Cheke LG, Bonnici HM, Clayton NS, et al. Obesity and insulin resistance are associated with  
6 526 reduced activity in core memory regions of the brain. *Neuropsychologia* 2017;96:137-49.  
7 527 35. Bruehl H, Sweat V, Tirsi A, et al. Obese Adolescents with Type 2 Diabetes Mellitus Have  
8 528 Hippocampal and Frontal Lobe Volume Reductions. *Neuroscience and medicine* 2011;2(1):34-  
9 529 42. doi: 10.4236/nm.2011.21005  
10 530 36. Spyridaki EC, Simos P, Avgoustinaki PD, et al. The association between obesity and fluid  
11 531 intelligence impairment is mediated by chronic low-grade inflammation. *British Journal of*  
12 532 *Nutrition* 2014;112(10):1724-34.  
13 533 37. Mangone A, Yates KF, Sweat V, et al. Cognitive functions among predominantly minority urban  
14 534 adolescents with metabolic syndrome. *Applied Neuropsychology: Child* 2017:1-7.  
15 535 38. Alosco ML, Spitznagel MB, Strain G, et al. Improved memory function two years after bariatric  
16 536 surgery. *Obesity* 2014;22(1):32-38.  
17 537 39. Olbers T, Beamish AJ, Gronowitz E, et al. Laparoscopic Roux-en-Y gastric bypass in adolescents  
18 538 with severe obesity (AMOS): a prospective, 5-year, Swedish nationwide study. *Lancet*  
19 539 *Diabetes Endocrinol* 2017;5(3):174-83. doi: 10.1016/S2213-8587(16)30424-7  
20 540 40. Biessels GJ, Reagan LP. Hippocampal insulin resistance and cognitive dysfunction. *Nature Reviews*  
21 541 *Neuroscience* 2015;16(11):660.  
22 542 41. Latner JD, Stunkard AJ. Getting worse: the stigmatization of obese children. *Obesity research*  
23 543 2003;11(3):452-6. doi: 10.1038/oby.2003.61  
24 544 42. Pierce JW, Wardle J. Cause and effect beliefs and self-esteem of overweight children. *Journal of*  
25 545 *child psychology and psychiatry, and allied disciplines* 1997;38(6):645-50. [published Online  
26 546 First: 1997/10/08]  
27 547 43. Lindberg L, Ek A, Nyman J, et al. Low grandparental social support combined with low parental  
28 548 socioeconomic status is closely associated with obesity in preschool-aged children: a pilot  
29 549 study. *Pediatr Obes* 2015 doi: 10.1111/ijpo.12049  
30 550 44. Brumpton B, Sanderson E, Heilbron K, et al. Avoiding dynastic, assortative mating, and population  
31 551 stratification biases in Mendelian randomization through within-family analyses. *Nature*  
32 552 *communications* 2020;11(1):3519. doi: 10.1038/s41467-020-17117-4 [published Online First:  
33 553 2020/07/16]  
34 554 45. Plomin R, von Stumm S. The new genetics of intelligence. *Nature reviews Genetics*  
35 555 2018;19(3):148-59. doi: 10.1038/nrg.2017.104 [published Online First: 2018/01/18]  
36  
37  
38  
39  
40  
41 556  
42  
43  
44  
45  
46  
47  
48  
49  
50  
51  
52  
53  
54  
55  
56  
57  
58  
59  
60



## 557 **Supporting information**

558 **S1 Table. International Classification of Diseases (ICD 10<sup>th</sup> revision) codes and**  
559 **Anatomical Therapeutic Chemical (ATC) classification system codes used.**

560 **S2 Table. Proportion of children completing  $\geq 12$  years of schooling.**

561 **S3 Table. Adjusted odds ratio (99% CI); p-value of subjects completing  $\geq 12$  years of**  
562 **schooling stratified by group.**

563 **S4 Table. Proportion of individuals who have undergone obesity treatment in childhood**  
564 **who completed  $\geq 12$  years of schooling by calendar year and by age at start of obesity**  
565 **treatment (n=3,942).**

## 567 **Figure Legends**

568 **Fig 1. Participant flowchart.**

570 **Fig 2. Percentage of individuals completing  $\geq 12$  years of schooling by SES level in the**  
571 **childhood obesity cohort (n=3,921, ) and the comparison group (n=18,528).**

573 **Fig 3. Crude percentage of individuals with obesity in childhood (n=3,921) completing  $\geq 12$**   
574 **school years by parental SES and treatment response. p=p for trend; n=refers to number**  
575 **of individuals in each category.**

576

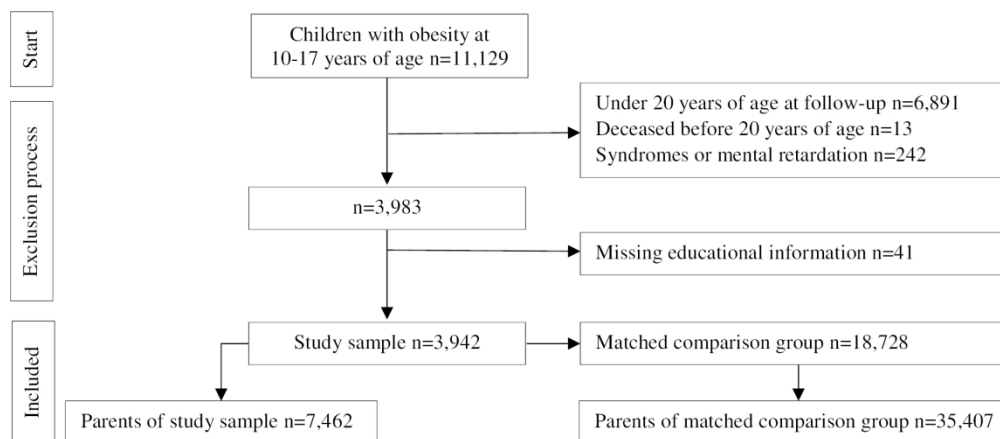

Figure 1

169x73mm (300 x 300 DPI)

1  
2  
3  
4  
5  
6  
7  
8  
9  
10  
11  
12  
13  
14  
15  
16  
17  
18  
19  
20  
21  
22  
23  
24  
25  
26  
27  
28  
29  
30  
31  
32  
33  
34  
35  
36  
37  
38  
39  
40  
41  
42  
43  
44  
45  
46  
47  
48  
49  
50  
51  
52  
53  
54  
55  
56  
57  
58  
59  
60

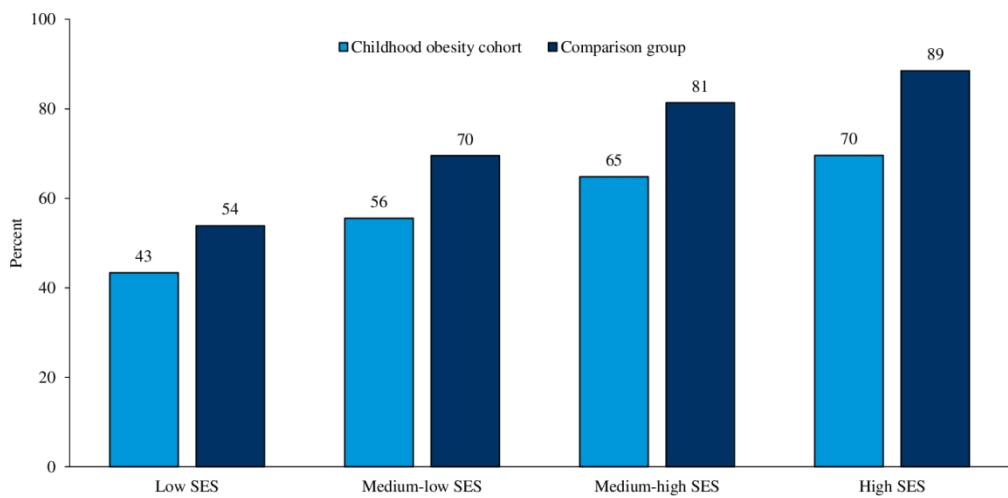

Fig 2. Percentage of individuals completing  $\geq 12$  years of schooling by SES level in the childhood obesity cohort (n=3,921) and the comparison group (n=18,528).

118x57mm (300 x 300 DPI)

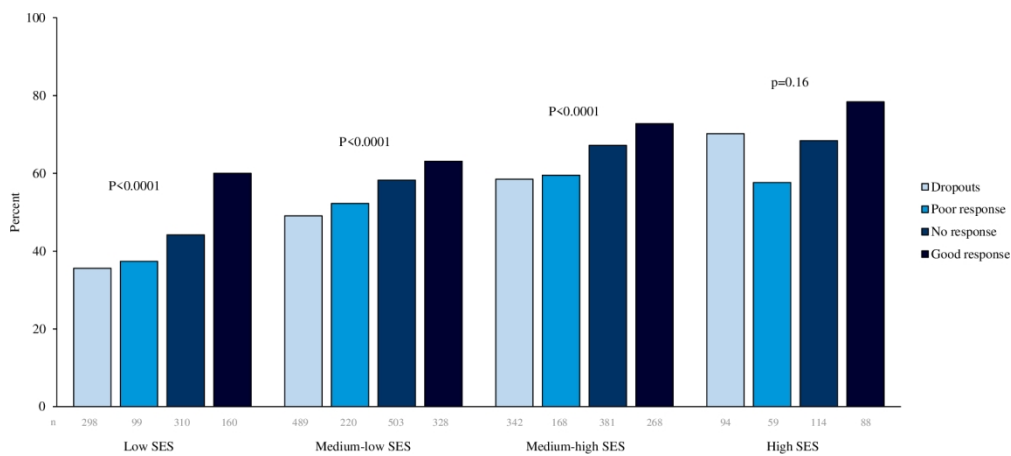

Fig 3. Crude percentage of individuals with obesity in childhood (n=3,921) completing ≥12 school years by parental SES and treatment response. p=p for trend; n=refers to number of individuals in each category.

150x66mm (300 x 300 DPI)

**S1 Table. International Classification of Diseases (ICD 10<sup>th</sup> revision) codes and Anatomical Therapeutic Chemical (ATC) classification system codes used.**

| Condition                  | ICD-10                                         | ATC Code |
|----------------------------|------------------------------------------------|----------|
| Anxiety/sedatives          | F40.0-F40.1, F41-F42, F51.4-F51.9, F93.0-F93.2 | N05B     |
| Depression/antidepressants | F32-F39, F92                                   | N06A     |
| ADHD/ADD                   | F90                                            | N06B     |
| Mental retardation         | F70-F79                                        |          |
| Genetic syndromes          |                                                |          |
| Fragile X                  | Q99.2                                          |          |
| Klinefelter                | Q98                                            |          |
| Laurence-Moon-Bardet-Biedl | Q87.8B                                         |          |
| Mb Down                    | Q90                                            |          |
| Noonan                     | Q87.1E                                         |          |
| Prader-Willi               | Q87.1F                                         |          |
| Silver Russell             | Q87.1G                                         |          |
| Turner                     | Q96                                            |          |

**S2 Table. Proportion of children completing  $\geq 12$  years of schooling**

|                              | Childhood obesity cohort |      | Comparison group |      | p-value <sup>¶</sup> |
|------------------------------|--------------------------|------|------------------|------|----------------------|
|                              | n                        | %    | n                | %    |                      |
| Total                        | 2,236                    | 56.7 | 13,939           | 74.4 | <0.0001              |
| Sex                          |                          |      |                  |      |                      |
| Girl                         | 1,090                    | 59.7 | 6,843            | 78.7 | <0.0001              |
| Boy                          | 1,146                    | 54.1 | 7,096            | 70.8 | <0.0001              |
| Migration background         |                          |      |                  |      |                      |
| Nordic                       | 1,695                    | 58.4 | 10,974           | 78.1 | <0.0001              |
| Non-Nordic                   | 541                      | 52.2 | 2,965            | 63.4 | <0.0001              |
| ADHD/ADD                     |                          |      |                  |      |                      |
| Non-ADHD/ADD                 | 2,032                    | 61.1 | 13,528           | 76.5 | <0.0001              |
| ADHD/ADD                     | 204                      | 33.1 | 411              | 39.4 | 0.01                 |
| Anxiety/depression           |                          |      |                  |      |                      |
| No anxiety/depression        | 1,902                    | 61.1 | 12,754           | 77.0 | <0.0001              |
| Anxiety/depression           | 334                      | 40.2 | 1,185            | 54.9 | <0.0001              |
| Parental SES                 |                          |      |                  |      |                      |
| Low                          | 376                      | 43.4 | 1,455            | 53.9 | <0.0001              |
| Medium-low                   | 855                      | 55.5 | 4,187            | 69.5 | <0.0001              |
| Medium-high                  | 751                      | 64.8 | 5,358            | 81.3 | <0.0001              |
| High                         | 247                      | 69.6 | 2,848            | 88.5 | <0.0001              |
| Maternal education           |                          |      |                  |      |                      |
| Compulsory school            | 755                      | 47.7 | 3,474            | 61.9 | <0.0001              |
| Upper secondary school       | 945                      | 61.3 | 5,582            | 77.9 | <0.0001              |
| University degree            | 506                      | 69.3 | 4,589            | 85.3 | <0.0001              |
| Paternal education           |                          |      |                  |      |                      |
| Compulsory school            | 639                      | 50.2 | 2,775            | 63.0 | <0.0001              |
| Upper secondary school       | 1,132                    | 59.9 | 7,085            | 77.9 | <0.0001              |
| University degree            | 318                      | 66.0 | 3,333            | 85.2 | <0.0001              |
| Maternal income              |                          |      |                  |      |                      |
| Q1                           | 614                      | 52.3 | 3,327            | 68.1 | <0.0001              |
| Q2                           | 750                      | 58.6 | 4,391            | 75.2 | <0.0001              |
| Q3                           | 542                      | 58.2 | 3,534            | 77.1 | <0.0001              |
| Q4                           | 304                      | 62.6 | 2,429            | 81.3 | <0.0001              |
| Paternal income              |                          |      |                  |      |                      |
| Q1                           | 556                      | 49.3 | 2,453            | 62.6 | <0.0001              |
| Q2                           | 410                      | 54.0 | 2,260            | 72.3 | <0.0001              |
| Q3                           | 549                      | 61.8 | 3,404            | 77.6 | <0.0001              |
| Q4                           | 572                      | 66.2 | 5,056            | 84.5 | <0.0001              |
| Maternal occupational status |                          |      |                  |      |                      |
| No occupation                | 438                      | 47.8 | 1,722            | 58.3 | <0.0001              |
| Occupation                   | 1,777                    | 60.0 | 12,005           | 77.9 | <0.0001              |
| Paternal occupational status |                          |      |                  |      |                      |
| No occupation                | 363                      | 45.4 | 1,543            | 58.7 | <0.0001              |
| Occupation                   | 1,736                    | 60.5 | 11,703           | 78.5 | <0.0001              |

Abbreviations: SES, socioeconomic status; Q, quartile. <sup>¶</sup>Performed with chi-square.

1 EUR  $\approx$  9.83 SEK December 31<sup>st</sup> 2017. Q1: <18,652 EUR; Q2: 18,652 to 25,025 EUR; Q3: 25,026 to 32,309 EUR; Q4: >32,309 EUR.

**S3 Table. Adjusted odds ratio (99% CI); p-value of subjects completing ≥12 years of schooling stratified by group**

|                                                               | Childhood obesity cohort     | Comparison group             |
|---------------------------------------------------------------|------------------------------|------------------------------|
| Parental SES (ref=low) <sup>a</sup>                           |                              |                              |
| Medium-low                                                    | 1.64 (1.30 to 2.07); <0.0001 | 1.81 (1.59 to 2.07); <0.0001 |
| Medium-high                                                   | 2.43 (1.88 to 3.12); <0.0001 | 3.25 (2.82 to 3.75); <0.0001 |
| High                                                          | 3.22 (2.24 to 4.64); <0.0001 | 5.80 (4.81 to 6.99); <0.0001 |
| Maternal education (ref=compulsory school) <sup>b</sup>       |                              |                              |
| Upper secondary school                                        | 1.64 (1.33 to 2.01); <0.0001 | 1.75 (1.56 to 1.96); <0.0001 |
| University degree                                             | 2.33 (1.76 to 3.09); <0.0001 | 2.54 (2.20 to 2.93); <0.0001 |
| Paternal education (ref=compulsory school) <sup>b</sup>       |                              |                              |
| Upper secondary school                                        | 1.29 (1.05 to 1.58); 0.0012  | 1.59 (1.42 to 1.79); <0.0001 |
| University degree                                             | 1.46 (1.06 to 2.01); 0.0025  | 2.28 (1.94 to 2.67); <0.0001 |
| Maternal income (ref=Q1) <sup>c</sup>                         |                              |                              |
| Q2                                                            | 1.28 (1.01 to 1.61); 0.0064  | 1.26 (1.11 to 1.42); <0.0001 |
| Q3                                                            | 1.26 (0.98 to 1.62); 0.019   | 1.30 (1.13 to 1.49); <0.0001 |
| Q4                                                            | 1.42 (1.04 to 1.95); 0.004   | 1.47 (1.25 to 1.73); <0.0001 |
| Paternal income (ref=Q1) <sup>c</sup>                         |                              |                              |
| Q2                                                            | 1.19 (0.92 to 1.54); 0.075   | 1.44 (1.25 to 1.66); <0.0001 |
| Q3                                                            | 1.57 (1.22 to 2.02); <0.0001 | 1.79 (1.56 to 2.05); <0.0001 |
| Q4                                                            | 1.96 (1.51 to 2.55); <0.0001 | 2.63 (2.29 to 3.03); <0.0001 |
| Maternal occupational status (ref=no occupation) <sup>d</sup> |                              |                              |
| Occupation                                                    | 1.42 (1.14 to 1.77); <0.0001 | 1.83 (1.61 to 2.08); <0.0001 |
| Paternal occupational status (ref=no occupation) <sup>d</sup> |                              |                              |
| Occupation                                                    | 1.63 (1.30 to 2.04); <0.0001 | 1.90 (1.67 to 2.16); <0.0001 |

<sup>a</sup>Adjusted for migration background, ADHD/ADD, anxiety/depression, parental SES

<sup>b</sup>Adjusted for migration background, ADHD/ADD, anxiety/depression, maternal-, and paternal education

<sup>c</sup>Adjusted for migration background, ADHD/ADD, anxiety/depression, maternal-, and paternal income

<sup>d</sup>Adjusted for migration background, ADHD/ADD, anxiety/depression, maternal-, and paternal occupational status

Abbreviations: SES, socioeconomic status; Q, quartile.

Q1: <18,652 EUR; Q2: 18,652 to 25,025 EUR; Q3: 25,026 to 32,309 EUR; Q4: >32,309 EUR. 1 EUR ≈ 9.83 SEK December 31<sup>st</sup> 2017.

**S4 Table. Proportion of individuals who have undergone obesity treatment in childhood who completed  $\geq 12$  years of schooling by calendar year and by age at start of obesity treatment (n=3,942).**

| <b>Individuals completing <math>\geq 12</math> years of schooling</b> |          |          |
|-----------------------------------------------------------------------|----------|----------|
|                                                                       | <b>n</b> | <b>%</b> |
| Calendar year at start of obesity treatment                           |          |          |
| 1995-2001                                                             | 229      | 62.6     |
| 2002-2008                                                             | 1,262    | 58.1     |
| 2009-2014                                                             | 745      | 53.1     |
| Age at start of obesity treatment                                     |          |          |
| 10 - 12.99                                                            | 960      | 59.0     |
| 13 - 16.99                                                            | 1,276    | 55.1     |



STROBE Statement—Checklist of items that should be included in reports of *cohort studies*

|                              | Item No | Recommendation                                                                                                                                                                                                                                                                                                         | Page No     |
|------------------------------|---------|------------------------------------------------------------------------------------------------------------------------------------------------------------------------------------------------------------------------------------------------------------------------------------------------------------------------|-------------|
| <b>Title and abstract</b>    | 1       | (a) Indicate the study's design with a commonly used term in the title or the abstract<br>(b) Provide in the abstract an informative and balanced summary of what was done and what was found                                                                                                                          | 1-2<br>2-3  |
| <b>Introduction</b>          |         |                                                                                                                                                                                                                                                                                                                        |             |
| Background/rationale         | 2       | Explain the scientific background and rationale for the investigation being reported                                                                                                                                                                                                                                   | 4           |
| Objectives                   | 3       | State specific objectives, including any prespecified hypotheses                                                                                                                                                                                                                                                       | 4.5         |
| <b>Methods</b>               |         |                                                                                                                                                                                                                                                                                                                        |             |
| Study design                 | 4       | Present key elements of study design early in the paper                                                                                                                                                                                                                                                                | 5           |
| Setting                      | 5       | Describe the setting, locations, and relevant dates, including periods of recruitment, exposure, follow-up, and data collection                                                                                                                                                                                        | 5-9         |
| Participants                 | 6       | (a) Give the eligibility criteria, and the sources and methods of selection of participants. Describe methods of follow-up<br>(b) For matched studies, give matching criteria and number of exposed and unexposed                                                                                                      | 5<br>5      |
| Variables                    | 7       | Clearly define all outcomes, exposures, predictors, potential confounders, and effect modifiers. Give diagnostic criteria, if applicable                                                                                                                                                                               | 7-9         |
| Data sources/<br>measurement | 8*      | For each variable of interest, give sources of data and details of methods of assessment (measurement). Describe comparability of assessment methods if there is more than one group                                                                                                                                   | 7-9         |
| Bias                         | 9       | Describe any efforts to address potential sources of bias                                                                                                                                                                                                                                                              | 7-9         |
| Study size                   | 10      | Explain how the study size was arrived at                                                                                                                                                                                                                                                                              | 5           |
| Quantitative variables       | 11      | Explain how quantitative variables were handled in the analyses. If applicable, describe which groupings were chosen and why                                                                                                                                                                                           | 9-10        |
| Statistical methods          | 12      | (a) Describe all statistical methods, including those used to control for confounding<br>(b) Describe any methods used to examine subgroups and interactions<br>(c) Explain how missing data were addressed<br>(d) If applicable, explain how loss to follow-up was addressed<br>(e) Describe any sensitivity analyses | 9-10        |
| <b>Results</b>               |         |                                                                                                                                                                                                                                                                                                                        |             |
| Participants                 | 13*     | (a) Report numbers of individuals at each stage of study—eg numbers potentially eligible, examined for eligibility, confirmed eligible, included in the study, completing follow-up, and analysed<br>(b) Give reasons for non-participation at each stage<br>(c) Consider use of a flow diagram                        | 12 +<br>fig |
| Descriptive data             | 14*     | (a) Give characteristics of study participants (eg demographic, clinical, social) and information on exposures and potential confounders<br>(b) Indicate number of participants with missing data for each variable of interest<br>(c) Summarise follow-up time (eg, average and total amount)                         | 11          |
| Outcome data                 | 15*     | Report numbers of outcome events or summary measures over time                                                                                                                                                                                                                                                         | 12          |

|    |                          |    |                                                                                                                                                                                                              |       |
|----|--------------------------|----|--------------------------------------------------------------------------------------------------------------------------------------------------------------------------------------------------------------|-------|
| 1  | Main results             | 16 | (a) Give unadjusted estimates and, if applicable, confounder-adjusted estimates and their precision (eg, 95% confidence interval). Make clear which confounders were adjusted for and why they were included | 12-17 |
| 2  |                          |    | (b) Report category boundaries when continuous variables were categorized                                                                                                                                    |       |
| 3  |                          |    | (c) If relevant, consider translating estimates of relative risk into absolute risk for a meaningful time period                                                                                             |       |
| 4  |                          |    |                                                                                                                                                                                                              |       |
| 5  |                          |    |                                                                                                                                                                                                              |       |
| 6  |                          |    |                                                                                                                                                                                                              |       |
| 7  |                          |    |                                                                                                                                                                                                              |       |
| 8  |                          |    |                                                                                                                                                                                                              |       |
| 9  | Other analyses           | 17 | Report other analyses done—eg analyses of subgroups and interactions, and sensitivity analyses                                                                                                               | 12-17 |
| 10 |                          |    |                                                                                                                                                                                                              |       |
| 11 | <b>Discussion</b>        |    |                                                                                                                                                                                                              |       |
| 12 |                          |    |                                                                                                                                                                                                              |       |
| 13 | Key results              | 18 | Summarise key results with reference to study objectives                                                                                                                                                     | 18    |
| 14 | Limitations              | 19 | Discuss limitations of the study, taking into account sources of potential bias or imprecision. Discuss both direction and magnitude of any potential bias                                                   | 20-21 |
| 15 |                          |    |                                                                                                                                                                                                              |       |
| 16 | Interpretation           | 20 | Give a cautious overall interpretation of results considering objectives, limitations, multiplicity of analyses, results from similar studies, and other relevant evidence                                   | 18-21 |
| 17 |                          |    |                                                                                                                                                                                                              |       |
| 18 |                          |    |                                                                                                                                                                                                              |       |
| 19 | Generalisability         | 21 | Discuss the generalisability (external validity) of the study results                                                                                                                                        | 21    |
| 20 |                          |    |                                                                                                                                                                                                              |       |
| 21 | <b>Other information</b> |    |                                                                                                                                                                                                              |       |
| 22 | Funding                  | 22 | Give the source of funding and the role of the funders for the present study and, if applicable, for the original study on which the present article is based                                                | 22-23 |
| 23 |                          |    |                                                                                                                                                                                                              |       |
| 24 |                          |    |                                                                                                                                                                                                              |       |

\*Give information separately for exposed and unexposed groups.

**Note:** An Explanation and Elaboration article discusses each checklist item and gives methodological background and published examples of transparent reporting. The STROBE checklist is best used in conjunction with this article (freely available on the Web sites of PLoS Medicine at <http://www.plosmedicine.org/>, Annals of Internal Medicine at <http://www.annals.org/>, and Epidemiology at <http://www.epidem.com/>). Information on the STROBE Initiative is available at <http://www.strobe-statement.org>.
