# Supplementary material for: Obesity in childhood, socioeconomic status, and completion of 12 or more school years: a prospective cohort study
Source: PubMed Central journal article supplement (PMC7957136; doi:10.1136/bmjopen-2020-040432), 2021-03-11
Supplement: bmjopen-2020-040432supp001.pdf [file bmjopen-2020-040432supp001.pdf]

**S1 Table. International Classification of Diseases (ICD 10<sup>th</sup> revision) codes and Anatomical Therapeutic Chemical (ATC) classification system codes used.**

| Condition                  | ICD-10                                            | ATC Code |
|----------------------------|---------------------------------------------------|----------|
| Anxiety/sedatives          | F40.0-F40.1, F41-F42,<br>F51.4-F51.9, F93.0-F93.2 | N05B     |
| Depression/antidepressants | F32-F39, F92                                      | N06A     |
| ADHD/ADD                   | F90                                               | N06B     |
| Mental retardation         | F70-F79                                           |          |
| Genetic syndromes          |                                                   |          |
| Fragile X                  | Q99.2                                             |          |
| Klinefelter                | Q98                                               |          |
| Laurence-Moon-Bardet-Biedl | Q87.8B                                            |          |
| Mb Down                    | Q90                                               |          |
| Noonan                     | Q87.1E                                            |          |
| Prader-Willi               | Q87.1F                                            |          |
| Silver Russell             | Q87.1G                                            |          |
| Turner                     | Q96                                               |          |
