# Supplementary material for: Obesity in childhood, socioeconomic status, and completion of 12 or more school years: a prospective cohort study
Source: PubMed Central journal article supplement (PMC7957136; doi:10.1136/bmjopen-2020-040432), 2021-03-11
Supplement: bmjopen-2020-040432supp002.pdf [file bmjopen-2020-040432supp002.pdf]

**S2 Table. Proportion of children completing  $\geq 12$  years of schooling**

|                              | Childhood obesity cohort |      | Comparison group |      | p-value <sup>¶</sup> |
|------------------------------|--------------------------|------|------------------|------|----------------------|
|                              | n                        | %    | n                | %    |                      |
| Total                        | 2,236                    | 56.7 | 13,939           | 74.4 | <0.0001              |
| Sex                          |                          |      |                  |      |                      |
| Girl                         | 1,090                    | 59.7 | 6,843            | 78.7 | <0.0001              |
| Boy                          | 1,146                    | 54.1 | 7,096            | 70.8 | <0.0001              |
| Migration background         |                          |      |                  |      |                      |
| Nordic                       | 1,695                    | 58.4 | 10,974           | 78.1 | <0.0001              |
| Non-Nordic                   | 541                      | 52.2 | 2,965            | 63.4 | <0.0001              |
| ADHD/ADD                     |                          |      |                  |      |                      |
| Non-ADHD/ADD                 | 2,032                    | 61.1 | 13,528           | 76.5 | <0.0001              |
| ADHD/ADD                     | 204                      | 33.1 | 411              | 39.4 | 0.01                 |
| Anxiety/depression           |                          |      |                  |      |                      |
| No anxiety/depression        | 1,902                    | 61.1 | 12,754           | 77.0 | <0.0001              |
| Anxiety/depression           | 334                      | 40.2 | 1,185            | 54.9 | <0.0001              |
| Parental SES                 |                          |      |                  |      |                      |
| Low                          | 376                      | 43.4 | 1,455            | 53.9 | <0.0001              |
| Medium-low                   | 855                      | 55.5 | 4,187            | 69.5 | <0.0001              |
| Medium-high                  | 751                      | 64.8 | 5,358            | 81.3 | <0.0001              |
| High                         | 247                      | 69.6 | 2,848            | 88.5 | <0.0001              |
| Maternal education           |                          |      |                  |      |                      |
| Compulsory school            | 755                      | 47.7 | 3,474            | 61.9 | <0.0001              |
| Upper secondary school       | 945                      | 61.3 | 5,582            | 77.9 | <0.0001              |
| University degree            | 506                      | 69.3 | 4,589            | 85.3 | <0.0001              |
| Paternal education           |                          |      |                  |      |                      |
| Compulsory school            | 639                      | 50.2 | 2,775            | 63.0 | <0.0001              |
| Upper secondary school       | 1,132                    | 59.9 | 7,085            | 77.9 | <0.0001              |
| University degree            | 318                      | 66.0 | 3,333            | 85.2 | <0.0001              |
| Maternal income              |                          |      |                  |      |                      |
| Q1                           | 614                      | 52.3 | 3,327            | 68.1 | <0.0001              |
| Q2                           | 750                      | 58.6 | 4,391            | 75.2 | <0.0001              |
| Q3                           | 542                      | 58.2 | 3,534            | 77.1 | <0.0001              |
| Q4                           | 304                      | 62.6 | 2,429            | 81.3 | <0.0001              |
| Paternal income              |                          |      |                  |      |                      |
| Q1                           | 556                      | 49.3 | 2,453            | 62.6 | <0.0001              |
| Q2                           | 410                      | 54.0 | 2,260            | 72.3 | <0.0001              |
| Q3                           | 549                      | 61.8 | 3,404            | 77.6 | <0.0001              |
| Q4                           | 572                      | 66.2 | 5,056            | 84.5 | <0.0001              |
| Maternal occupational status |                          |      |                  |      |                      |
| No occupation                | 438                      | 47.8 | 1,722            | 58.3 | <0.0001              |
| Occupation                   | 1,777                    | 60.0 | 12,005           | 77.9 | <0.0001              |
| Paternal occupational status |                          |      |                  |      |                      |
| No occupation                | 363                      | 45.4 | 1,543            | 58.7 | <0.0001              |
| Occupation                   | 1,736                    | 60.5 | 11,703           | 78.5 | <0.0001              |

Abbreviations: SES, socioeconomic status; Q, quartile. <sup>¶</sup>Performed with chi-square.

1 EUR  $\approx$  9.83 SEK December 31<sup>st</sup> 2017. Q1: <18,652 EUR; Q2: 18,652 to 25,025 EUR; Q3: 25,026 to 32,309 EUR; Q4: >32,309 EUR.
