# Supplementary material for: Obesity in childhood, socioeconomic status, and completion of 12 or more school years: a prospective cohort study
Source: PubMed Central journal article supplement (PMC7957136; doi:10.1136/bmjopen-2020-040432), 2021-03-11
Supplement: bmjopen-2020-040432supp003.pdf [file bmjopen-2020-040432supp003.pdf]

**S3 Table. Adjusted odds ratio (99% CI); p-value of subjects completing ≥12 years of schooling stratified by group**

|                                                               | Childhood obesity cohort     | Comparison group             |
|---------------------------------------------------------------|------------------------------|------------------------------|
| Parental SES (ref=low) <sup>a</sup>                           |                              |                              |
| Medium-low                                                    | 1.64 (1.30 to 2.07); <0.0001 | 1.81 (1.59 to 2.07); <0.0001 |
| Medium-high                                                   | 2.43 (1.88 to 3.12); <0.0001 | 3.25 (2.82 to 3.75); <0.0001 |
| High                                                          | 3.22 (2.24 to 4.64); <0.0001 | 5.80 (4.81 to 6.99); <0.0001 |
| Maternal education (ref=compulsory school) <sup>b</sup>       |                              |                              |
| Upper secondary school                                        | 1.64 (1.33 to 2.01); <0.0001 | 1.75 (1.56 to 1.96); <0.0001 |
| University degree                                             | 2.33 (1.76 to 3.09); <0.0001 | 2.54 (2.20 to 2.93); <0.0001 |
| Paternal education (ref=compulsory school) <sup>b</sup>       |                              |                              |
| Upper secondary school                                        | 1.29 (1.05 to 1.58); 0.0012  | 1.59 (1.42 to 1.79); <0.0001 |
| University degree                                             | 1.46 (1.06 to 2.01); 0.0025  | 2.28 (1.94 to 2.67); <0.0001 |
| Maternal income (ref=Q1) <sup>c</sup>                         |                              |                              |
| Q2                                                            | 1.28 (1.01 to 1.61); 0.0064  | 1.26 (1.11 to 1.42); <0.0001 |
| Q3                                                            | 1.26 (0.98 to 1.62); 0.019   | 1.30 (1.13 to 1.49); <0.0001 |
| Q4                                                            | 1.42 (1.04 to 1.95); 0.004   | 1.47 (1.25 to 1.73); <0.0001 |
| Paternal income (ref=Q1) <sup>c</sup>                         |                              |                              |
| Q2                                                            | 1.19 (0.92 to 1.54); 0.075   | 1.44 (1.25 to 1.66); <0.0001 |
| Q3                                                            | 1.57 (1.22 to 2.02); <0.0001 | 1.79 (1.56 to 2.05); <0.0001 |
| Q4                                                            | 1.96 (1.51 to 2.55); <0.0001 | 2.63 (2.29 to 3.03); <0.0001 |
| Maternal occupational status (ref=no occupation) <sup>d</sup> |                              |                              |
| Occupation                                                    | 1.42 (1.14 to 1.77); <0.0001 | 1.83 (1.61 to 2.08); <0.0001 |
| Paternal occupational status (ref=no occupation) <sup>d</sup> |                              |                              |
| Occupation                                                    | 1.63 (1.30 to 2.04); <0.0001 | 1.90 (1.67 to 2.16); <0.0001 |

<sup>a</sup>Adjusted for migration background, ADHD/ADD, anxiety/depression, parental SES

<sup>b</sup>Adjusted for migration background, ADHD/ADD, anxiety/depression, maternal-, and paternal education

<sup>c</sup>Adjusted for migration background, ADHD/ADD, anxiety/depression, maternal-, and paternal income

<sup>d</sup>Adjusted for migration background, ADHD/ADD, anxiety/depression, maternal-, and paternal occupational status

Abbreviations: SES, socioeconomic status; Q, quartile.

Q1: <18,652 EUR; Q2: 18,652 to 25,025 EUR; Q3: 25,026 to 32,309 EUR; Q4: >32,309 EUR. 1 EUR ≈ 9.83 SEK December 31<sup>st</sup> 2017.
