# Supplementary material for: Obesity in childhood, socioeconomic status, and completion of 12 or more school years: a prospective cohort study
Source: PubMed Central journal article supplement (PMC7957136; doi:10.1136/bmjopen-2020-040432), 2021-03-11
Supplement: bmjopen-2020-040432supp004.pdf [file bmjopen-2020-040432supp004.pdf]

**S4 Table. Proportion of individuals who have undergone obesity treatment in childhood who completed  $\geq 12$  years of schooling by calendar year and by age at start of obesity treatment (n=3,942).**

| <b>Individuals completing <math>\geq 12</math> years of schooling</b> |       |      |
|-----------------------------------------------------------------------|-------|------|
|                                                                       | n     | %    |
| Calendar year at start of obesity treatment                           |       |      |
| 1995-2001                                                             | 229   | 62.6 |
| 2002-2008                                                             | 1,262 | 58.1 |
| 2009-2014                                                             | 745   | 53.1 |
| Age at start of obesity treatment                                     |       |      |
| 10 - 12.99                                                            | 960   | 59.0 |
| 13 - 16.99                                                            | 1,276 | 55.1 |
